# Supplementary material for: Genomic analysis of 21 patients with corneal neuralgia after refractive surgery
Source: PubMed Central journal article supplement — Pain Rep. 2020 Jul 27;5(4):e826. doi: 10.1097/PR9.0000000000000826 (PMC7390595; doi:10.1097/pr9.0000000000000826), 2020-07-27
Supplement: painreports-5-e826-s003.pdf [file painreports-5-e826-s003.pdf]

| SYMBOL  | Case_AC | gnomAD_AC   | OR       | CI_from  | CI_to    | P value  | Bonferroni corrected_p value |
|---------|---------|-------------|----------|----------|----------|----------|------------------------------|
| A1BG    | 3       | 1686.477916 | 12.01013 | 3.699465 | 38.99032 | 0.002481 | 1                            |
| A2M     | 1       | 5917.042011 | 1.064197 | 0.14618  | 7.747396 | 0.614194 | 1                            |
| AADACL2 | 1       | 685.2581327 | 9.38485  | 1.287512 | 68.40742 | 0.103491 | 1                            |
| AAED1   | 1       | 460.085877  | 13.99047 | 1.918035 | 102.0489 | 0.070755 | 1                            |
| AAK1    | 2       | 2443.713434 | 5.363974 | 1.293321 | 22.24677 | 0.057813 | 1                            |
| AARS    | 1       | 8354.566458 | 0.746226 | 0.102508 | 5.432299 | 1        | 1                            |
| AARS2   | 2       | 10286.27976 | 1.234192 | 0.297705 | 5.116585 | 0.679016 | 1                            |
| ABCA10  | 1       | 2908.3814   | 2.191611 | 0.300993 | 15.95772 | 0.372072 | 1                            |
| ABCA13  | 4       | 17555.25921 | 1.480663 | 0.526958 | 4.160413 | 0.359847 | 1                            |
| ABCA3   | 1       | 2524.468234 | 2.528804 | 0.347285 | 18.41384 | 0.332084 | 1                            |
| ABCA4   | 1       | 5958.798935 | 1.05656  | 0.145131 | 7.691789 | 0.616824 | 1                            |
| ABCA5   | 1       | 2481.745124 | 2.572779 | 0.353322 | 18.73418 | 0.327563 | 1                            |
| ABCA6   | 1       | 5679.289731 | 1.109821 | 0.152446 | 8.079596 | 0.598953 | 1                            |
| ABCA7   | 1       | 13011.92236 | 0.469952 | 0.064559 | 3.420964 | 0.722651 | 1                            |
| ABCB1   | 1       | 2549.220608 | 2.504001 | 0.34388  | 18.23317 | 0.334762 | 1                            |
| ABCB9   | 1       | 1280.940271 | 5.008642 | 0.687589 | 36.4847  | 0.184868 | 1                            |
| ABCC10  | 2       | 4484.811894 | 2.898804 | 0.699114 | 12.01959 | 0.159597 | 1                            |
| ABCC11  | 1       | 6634.123932 | 0.946396 | 0.130001 | 6.889682 | 1        | 1                            |
| ABCF3   | 1       | 2944.713518 | 2.164255 | 0.297237 | 15.75846 | 0.375799 | 1                            |
| ABHD10  | 1       | 688.9183829 | 9.334852 | 1.280663 | 68.04247 | 0.104063 | 1                            |
| ABHD16A | 1       | 574.5706337 | 11.19772 | 1.535804 | 81.64388 | 0.08763  | 1                            |
| ABHD2   | 1       | 54.10203329 | 119.1679 | 16.08287 | 882.9892 | 0.00871  | 1                            |
| ABHD8   | 1       | 440.8819468 | 14.60099 | 2.001551 | 106.5118 | 0.067938 | 1                            |
| ABI1    | 1       | 443.7496802 | 14.50646 | 1.988621 | 105.8207 | 0.068383 | 1                            |
| ABLIM3  | 1       | 1872.298097 | 3.418584 | 0.469417 | 24.89622 | 0.258432 | 1                            |
| ABTB1   | 1       | 1220.067234 | 5.259818 | 0.722044 | 38.3158  | 0.176881 | 1                            |
| ABTB2   | 1       | 577.8114816 | 11.13477 | 1.527185 | 81.18414 | 0.088066 | 1                            |
| ACAD10  | 1       | 12959.3972  | 0.47196  | 0.064835 | 3.435587 | 0.722573 | 1                            |
| ACAD8   | 2       | 4060.298315 | 3.207383 | 0.77351  | 13.29951 | 0.136251 | 1                            |
| ACAD9   | 1       | 5091.943795 | 1.240794 | 0.170433 | 9.033271 | 0.55881  | 1                            |
| ACD     | 1       | 559.7119381 | 11.49567 | 1.576598 | 83.82    | 0.085446 | 1                            |
| ACE     | 3       | 10552.25933 | 1.851355 | 0.570734 | 6.005452 | 0.235222 | 1                            |
| ACOT11  | 2       | 1287.989966 | 10.22434 | 2.463994 | 42.42586 | 0.01802  | 1                            |
| ACOT13  | 2       | 442.2006459 | 29.88091 | 7.186681 | 124.2394 | 0.002319 | 1                            |
| ACOXL   | 6       | 10727.57962 | 3.960683 | 1.66246  | 9.436023 | 0.006644 | 1                            |
| ACSM1   | 1       | 5943.642134 | 1.059319 | 0.14551  | 7.711883 | 0.615887 | 1                            |
| ACSM2A  | 1       | 1088.938419 | 5.896287 | 0.809338 | 42.95634 | 0.159472 | 1                            |
| ACTL7A  | 1       | 8066.464702 | 0.773794 | 0.106294 | 5.633008 | 1        | 1                            |
| ACTL7B  | 1       | 1160.94825  | 5.52897  | 0.758961 | 40.2781  | 0.169085 | 1                            |
| ACTR3C  | 2       | 9136.322992 | 1.39616  | 0.336768 | 5.78815  | 0.656793 | 1                            |
| ACVRL1  | 1       | 683.9832417 | 9.40239  | 1.289915 | 68.53546 | 0.103348 | 1                            |
| ADAD2   | 1       | 1622.186162 | 3.949621 | 0.542292 | 28.76586 | 0.228139 | 1                            |
| ADAM17  | 1       | 2436.383012 | 2.621158 | 0.359963 | 19.0866  | 0.322577 | 1                            |
| ADAM20  | 1       | 1412.790633 | 4.538811 | 0.623135 | 33.05996 | 0.201891 | 1                            |
| ADAM7   | 1       | 1878.599065 | 3.407031 | 0.467832 | 24.81205 | 0.259263 | 1                            |
| ADAM8   | 1       | 9776.876373 | 0.633937 | 0.087084 | 4.614792 | 1        | 1                            |
| ADAMTS1 | 1       | 5654.022655 | 1.114895 | 0.153143 | 8.116543 | 0.597318 | 1                            |
| ADAMTS1 | 1       | 9785.313171 | 0.633369 | 0.087006 | 4.610652 | 1        | 1                            |
| ADAMTS1 | 1       | 5363.689707 | 1.176631 | 0.161622 | 8.566069 | 0.577876 | 1                            |
| ADAMTS1 | 1       | 633.1599567 | 10.15917 | 1.39358  | 74.06015 | 0.096027 | 1                            |
| ADAMTS2 | 1       | 11055.23145 | 0.557668 | 0.076608 | 4.059538 | 1        | 1                            |
| ADAMTS5 | 2       | 9027.739483 | 1.413586 | 0.340971 | 5.860404 | 0.654905 | 1                            |
| ADAMTS7 | 1       | 2578.623526 | 2.475157 | 0.33992  | 18.02306 | 0.33796  | 1                            |
| ADAMTS9 | 1       | 2736.315326 | 2.331037 | 0.320135 | 16.97328 | 0.354458 | 1                            |
| ADAMTSL | 1       | 3613.407918 | 1.758994 | 0.241594 | 12.80689 | 0.439498 | 1                            |
| ADAMTSL | 1       | 12459.25364 | 0.491935 | 0.067579 | 3.581003 | 0.722331 | 1                            |
| ADAP1   | 1       | 343.7310061 | 18.735   | 2.566665 | 136.7535 | 0.053425 | 1                            |
| ADAT1   | 2       | 1074.850493 | 12.26223 | 2.954497 | 50.89265 | 0.012828 | 1                            |
| ADC     | 1       | 7115.748497 | 0.880605 | 0.120965 | 6.410661 | 1        | 1                            |
| ADCK2   | 1       | 1266.364071 | 5.066588 | 0.695538 | 36.90712 | 0.182911 | 1                            |
| ADCK4   | 2       | 7907.094928 | 1.621388 | 0.391086 | 6.722045 | 0.359589 | 1                            |
| ADCY6   | 2       | 6791.866868 | 1.896263 | 0.457374 | 7.861857 | 0.294176 | 1                            |
| ADGB    | 1       | 1924.27393  | 3.325553 | 0.456649 | 24.21838 | 0.264585 | 1                            |
| ADPRHL1 | 1       | 11130.90895 | 0.553702 | 0.076063 | 4.030666 | 1        | 1                            |
| ADRA1A  | 1       | 7179.701998 | 0.872532 | 0.119856 | 6.351888 | 1        | 1                            |
| AFAP1   | 1       | 1661.615939 | 3.855289 | 0.529348 | 28.07842 | 0.233066 | 1                            |
| AFF1    | 1       | 2022.505109 | 3.162789 | 0.43431  | 23.03248 | 0.276163 | 1                            |
| AGAP3   | 2       | 1303.48062  | 10.1022  | 2.434591 | 41.91855 | 0.018414 | 1                            |
| AGAP6   | 2       | 5148.998339 | 2.518088 | 0.607319 | 10.44059 | 0.197398 | 1                            |
| AGBL1   | 1       | 5243.505654 | 1.204188 | 0.165406 | 8.766723 | 0.569566 | 1                            |
| AGMAT   | 1       | 638.5822934 | 10.07269 | 1.381735 | 73.42875 | 0.096891 | 1                            |
| AGR3    | 2       | 355.7999999 | 37.14982 | 8.928322 | 154.5765 | 0.00152  | 1                            |

|         |   |             |          |          |          |          |   |
|---------|---|-------------|----------|----------|----------|----------|---|
| AGRN    | 2 | 18546.77429 | 0.661058 | 0.159466 | 2.740383 | 0.76718  | 1 |
| AGT     | 1 | 1053.650849 | 6.094617 | 0.836536 | 44.40256 | 0.15476  | 1 |
| AHCY    | 1 | 4122.555358 | 1.538587 | 0.211328 | 11.20177 | 0.483819 | 1 |
| AHDC1   | 1 | 3506.791709 | 1.813252 | 0.249044 | 13.20204 | 0.429831 | 1 |
| AH11    | 5 | 9278.278212 | 3.729413 | 1.460768 | 9.521377 | 0.015367 | 1 |
| AHNAK   | 5 | 24836.97708 | 1.303696 | 0.510713 | 3.327941 | 0.591114 | 1 |
| AHNAK2  | 3 | 60736.16452 | 0.254659 | 0.078516 | 0.825963 | 0.014583 | 1 |
| AHSG    | 1 | 5399.142133 | 1.168737 | 0.160537 | 8.508586 | 0.58027  | 1 |
| AIFM2   | 1 | 1880.645968 | 3.403295 | 0.467319 | 24.78483 | 0.2595   | 1 |
| AIM1    | 1 | 14372.90696 | 0.423024 | 0.058113 | 3.079334 | 0.727738 | 1 |
| AIM1L   | 1 | 4298.947195 | 1.474404 | 0.202514 | 10.73439 | 0.498306 | 1 |
| AK8     | 2 | 10087.55023 | 1.259543 | 0.303819 | 5.221696 | 0.674958 | 1 |
| AKAP12  | 3 | 8104.038881 | 2.435142 | 0.750668 | 7.899516 | 0.137679 | 1 |
| AKAP13  | 3 | 16360.21599 | 1.165331 | 0.359267 | 3.77991  | 0.743811 | 1 |
| AKAP5   | 1 | 945.9158126 | 6.791684 | 0.932117 | 49.48624 | 0.140058 | 1 |
| AKAP9   | 1 | 4839.027441 | 1.306985 | 0.179523 | 9.515254 | 0.540324 | 1 |
| AKR1C3  | 1 | 12784.5516  | 0.478766 | 0.06577  | 3.48513  | 0.722387 | 1 |
| AKT1S1  | 1 | 145.4637045 | 44.3058  | 6.046631 | 324.6442 | 0.022958 | 1 |
| ALDH1A3 | 1 | 201.8516654 | 31.92166 | 4.364587 | 233.4682 | 0.031781 | 1 |
| ALDH1B1 | 1 | 2250.509132 | 2.839762 | 0.389971 | 20.67909 | 0.302157 | 1 |
| ALDH3B2 | 1 | 6560.0037   | 0.957379 | 0.131509 | 6.969648 | 1        | 1 |
| ALDH4A1 | 1 | 6394.372833 | 0.982842 | 0.135007 | 7.155043 | 1        | 1 |
| ALDH7A1 | 1 | 648.4725673 | 9.918674 | 1.360639 | 72.30432 | 0.098186 | 1 |
| ALDH9A1 | 1 | 7588.520069 | 0.824145 | 0.11321  | 5.999591 | 1        | 1 |
| ALG1    | 1 | 584.6977665 | 11.00333 | 1.509186 | 80.22421 | 0.089083 | 1 |
| ALKBH8  | 1 | 7835.379247 | 0.797372 | 0.109533 | 5.804666 | 1        | 1 |
| ALOX15  | 1 | 8720.661716 | 0.713823 | 0.098057 | 5.196388 | 1        | 1 |
| ALOXE3  | 1 | 1316.725064 | 4.871824 | 0.668821 | 35.48735 | 0.189545 | 1 |
| ALPK1   | 2 | 14952.47567 | 0.832615 | 0.200847 | 3.451628 | 1        | 1 |
| ALPK2   | 3 | 25939.88128 | 0.705028 | 0.217365 | 2.28677  | 0.794539 | 1 |
| ALPK3   | 1 | 8412.987387 | 0.740866 | 0.101772 | 5.393275 | 1        | 1 |
| ALX1    | 2 | 1663.374628 | 7.905066 | 1.905516 | 32.79429 | 0.028928 | 1 |
| AMER2   | 2 | 3609.392015 | 3.614643 | 0.871691 | 14.98884 | 0.112471 | 1 |
| AMOTL1  | 1 | 1110.883532 | 5.779302 | 0.793294 | 42.10333 | 0.162421 | 1 |
| AMPD1   | 3 | 10682.65949 | 1.827766 | 0.563463 | 5.928924 | 0.240799 | 1 |
| AMY2B   | 4 | 11398.017   | 2.340543 | 0.832936 | 6.576908 | 0.106288 | 1 |
| ANAPC2  | 1 | 684.9259945 | 9.389413 | 1.288138 | 68.44073 | 0.103491 | 1 |
| ANGPTL4 | 1 | 4234.234626 | 1.49733  | 0.205663 | 10.90133 | 0.493002 | 1 |
| ANGPTL5 | 2 | 8087.652141 | 1.584015 | 0.382073 | 6.567078 | 0.370044 | 1 |
| ANK1    | 2 | 5593.006494 | 2.314008 | 0.55811  | 9.594227 | 0.223286 | 1 |
| ANK2    | 2 | 11518.78668 | 1.096503 | 0.264496 | 4.545701 | 0.705662 | 1 |
| ANKLE2  | 1 | 4907.932491 | 1.288276 | 0.176954 | 9.379018 | 0.545439 | 1 |
| ANKMY1  | 1 | 6430.736657 | 0.977139 | 0.134223 | 7.113521 | 1        | 1 |
| ANKRD24 | 6 | 15103.26976 | 2.762075 | 1.159424 | 6.580039 | 0.031041 | 1 |
| ANKRD45 | 1 | 1475.737587 | 4.344116 | 0.596422 | 31.64091 | 0.209894 | 1 |
| ANKRD50 | 1 | 728.4361858 | 8.827043 | 1.211088 | 64.33611 | 0.109618 | 1 |
| ANKS1B  | 2 | 8465.616036 | 1.510944 | 0.364451 | 6.26409  | 0.391674 | 1 |
| ANKS6   | 1 | 2095.232204 | 3.052116 | 0.419119 | 22.22616 | 0.284472 | 1 |
| ANKUB1  | 1 | 3136.529791 | 2.03033  | 0.27885  | 14.78303 | 0.394797 | 1 |
| ANLN    | 1 | 1539.479822 | 4.163186 | 0.571597 | 30.32226 | 0.217818 | 1 |
| ANO10   | 1 | 17770.97569 | 0.337232 | 0.046328 | 2.454799 | 0.364999 | 1 |
| ANO6    | 1 | 3680.253588 | 1.726579 | 0.237143 | 12.57082 | 0.445526 | 1 |
| ANO7    | 4 | 6664.424638 | 4.081899 | 1.452469 | 11.47143 | 0.021124 | 1 |
| ANPEP   | 1 | 2246.984493 | 2.844257 | 0.390588 | 20.71184 | 0.301708 | 1 |
| ANTXR2  | 1 | 934.4617668 | 6.875246 | 0.943574 | 50.09573 | 0.138409 | 1 |
| ANXA10  | 1 | 2055.465777 | 3.11166  | 0.427292 | 22.65998 | 0.279868 | 1 |
| ANXA11  | 1 | 4633.472409 | 1.366105 | 0.187642 | 9.94575  | 0.524716 | 1 |
| ANXA5   | 1 | 863.7955078 | 7.439801 | 1.020968 | 54.21389 | 0.128729 | 1 |
| ANXA6   | 1 | 1142.75221  | 5.617416 | 0.771092 | 40.92296 | 0.166692 | 1 |
| AP1S3   | 1 | 4249.700383 | 1.491787 | 0.204902 | 10.86097 | 0.494313 | 1 |
| AP2A2   | 1 | 320.1245856 | 20.11844 | 2.755622 | 146.8821 | 0.0498   | 1 |
| AP4E1   | 1 | 617.8021598 | 10.41235 | 1.428256 | 75.90872 | 0.093862 | 1 |
| AP5Z1   | 1 | 2650.934989 | 2.40694  | 0.330555 | 17.52616 | 0.345577 | 1 |
| APAF1   | 2 | 1123.768467 | 11.72616 | 2.82549  | 48.66511 | 0.013954 | 1 |
| APBA3   | 2 | 6453.849371 | 1.998335 | 0.481989 | 8.285133 | 0.274153 | 1 |
| APC2    | 2 | 6491.926783 | 1.986306 | 0.479088 | 8.235248 | 0.276405 | 1 |
| APLF    | 2 | 8319.937282 | 1.538322 | 0.371053 | 6.37761  | 0.383354 | 1 |
| APLP1   | 2 | 1755.29371  | 7.488347 | 1.805143 | 31.06421 | 0.031922 | 1 |
| APMAP   | 1 | 7612.028672 | 0.82152  | 0.11285  | 5.980484 | 1        | 1 |
| APOB    | 1 | 23212.73447 | 0.252164 | 0.034642 | 1.835542 | 0.176551 | 1 |
| AQP7    | 1 | 1294.46888  | 4.956028 | 0.680372 | 36.10116 | 0.18656  | 1 |
| AQP8    | 1 | 3906.884126 | 1.624937 | 0.223186 | 11.8306  | 0.465482 | 1 |
| ARAP1   | 1 | 2039.268924 | 3.136578 | 0.430712 | 22.84152 | 0.278018 | 1 |

|          |   |             |          |          |          |          |   |
|----------|---|-------------|----------|----------|----------|----------|---|
| ARAP2    | 1 | 2806.930966 | 2.271749 | 0.311995 | 16.54142 | 0.361787 | 1 |
| ARAP3    | 2 | 6583.954607 | 1.957806 | 0.472216 | 8.117066 | 0.281857 | 1 |
| ARFGEF2  | 1 | 891.1131366 | 7.210943 | 0.989596 | 52.54439 | 0.132476 | 1 |
| ARHGAP1  | 1 | 3709.318754 | 1.712849 | 0.235257 | 12.47083 | 0.448115 | 1 |
| ARHGAP2  | 2 | 3212.186438 | 4.068123 | 0.981005 | 16.87007 | 0.092602 | 1 |
| ARHGAP2. | 1 | 1880.544158 | 3.403481 | 0.467344 | 24.78618 | 0.2595   | 1 |
| ARHGAP2. | 1 | 1409.826461 | 4.548408 | 0.624451 | 33.12991 | 0.201508 | 1 |
| ARHGAP3  | 3 | 6740.569966 | 2.944118 | 0.907531 | 9.551007 | 0.091573 | 1 |
| ARHGAP3. | 1 | 1815.525878 | 3.526286 | 0.484198 | 25.68099 | 0.251748 | 1 |
| ARHGAP3. | 2 | 3357.122239 | 3.890219 | 0.938122 | 16.13203 | 0.09973  | 1 |
| ARHGAP3. | 1 | 162.2335609 | 39.72332 | 5.424955 | 290.8673 | 0.025598 | 1 |
| ARHGAP8  | 1 | 5984.89783  | 1.05184  | 0.144483 | 7.657427 | 0.618444 | 1 |
| ARHGEF2  | 2 | 6437.243626 | 2.003626 | 0.483265 | 8.307073 | 0.273145 | 1 |
| ARHGEF2  | 1 | 4856.091646 | 1.302302 | 0.17888  | 9.481155 | 0.541589 | 1 |
| ARID1A   | 1 | 795.6426495 | 8.079273 | 1.108617 | 58.87937 | 0.119224 | 1 |
| ARL13B   | 1 | 2738.444808 | 2.329205 | 0.319883 | 16.95993 | 0.354666 | 1 |
| ARMC3    | 1 | 4324.121218 | 1.465671 | 0.201315 | 10.67079 | 0.500331 | 1 |
| ARPC1B   | 1 | 892.974705  | 7.195857 | 0.987528 | 52.43435 | 0.132752 | 1 |
| ARR3     | 1 | 2418.204147 | 2.641055 | 0.362694 | 19.23154 | 0.320616 | 1 |
| ARRDC1   | 1 | 5272.936923 | 1.197324 | 0.164463 | 8.71674  | 0.571588 | 1 |
| ARSK     | 1 | 1008.518129 | 6.368508 | 0.874094 | 46.39991 | 0.148665 | 1 |
| ARVCF    | 1 | 4550.555073 | 1.391464 | 0.191125 | 10.13042 | 0.518361 | 1 |
| ASB11    | 1 | 2582.584815 | 2.471321 | 0.339394 | 17.99512 | 0.338386 | 1 |
| ASB16    | 1 | 7508.753269 | 0.833172 | 0.11445  | 6.065317 | 1        | 1 |
| ASB18    | 1 | 2714.755165 | 2.349754 | 0.322704 | 17.10961 | 0.352275 | 1 |
| ASCC2    | 1 | 2597.974851 | 2.456529 | 0.337363 | 17.88737 | 0.339979 | 1 |
| ASCC3    | 2 | 1379.299751 | 9.544    | 2.300197 | 39.60006 | 0.020467 | 1 |
| ASH1L    | 1 | 2524.916362 | 2.528351 | 0.347223 | 18.41054 | 0.332192 | 1 |
| ASMTL    | 4 | 4632.034818 | 5.921659 | 2.106856 | 16.64377 | 0.00621  | 1 |
| ASPG     | 2 | 4497.949446 | 2.890183 | 0.697035 | 11.98384 | 0.160323 | 1 |
| ASPM     | 2 | 14740.87423 | 0.845323 | 0.203912 | 3.504311 | 1        | 1 |
| ASPSCR1  | 1 | 1319.510586 | 4.861486 | 0.667402 | 35.41199 | 0.189934 | 1 |
| ASXL1    | 1 | 3109.907901 | 2.04793  | 0.281266 | 14.91122 | 0.39216  | 1 |
| ASXL2    | 1 | 2279.457036 | 2.803373 | 0.384976 | 20.414   | 0.305285 | 1 |
| ASXL3    | 2 | 3310.533398 | 3.945706 | 0.951497 | 16.36222 | 0.097452 | 1 |
| ATAD2B   | 1 | 583.1754788 | 11.03212 | 1.513129 | 80.43446 | 0.088792 | 1 |
| ATAD3C   | 1 | 5149.208994 | 1.22671  | 0.168499 | 8.930715 | 0.562874 | 1 |
| ATF6B    | 2 | 1735.482359 | 7.57443  | 1.825878 | 31.42159 | 0.031261 | 1 |
| ATG4C    | 1 | 982.6993258 | 6.536504 | 0.89713  | 47.6251  | 0.145123 | 1 |
| ATG4D    | 1 | 1193.133421 | 5.379132 | 0.738409 | 39.18566 | 0.173322 | 1 |
| ATG9A    | 1 | 678.7725086 | 9.474766 | 1.299831 | 69.06377 | 0.102633 | 1 |
| ATM      | 4 | 13369.77488 | 1.978976 | 0.704281 | 5.560774 | 0.161757 | 1 |
| ATMIN    | 1 | 3409.615161 | 1.865662 | 0.25624  | 13.58373 | 0.420843 | 1 |
| ATP10B   | 2 | 11035.95791 | 1.146778 | 0.276621 | 4.754148 | 0.695    | 1 |
| ATP1A3   | 1 | 255.8593122 | 25.17811 | 3.446033 | 183.9615 | 0.040068 | 1 |
| ATP1A4   | 1 | 7360.674235 | 0.850449 | 0.116823 | 6.191108 | 1        | 1 |
| ATP2A1   | 1 | 838.9387422 | 7.660993 | 1.051287 | 55.82757 | 0.125247 | 1 |
| ATP2B4   | 1 | 2583.246792 | 2.470681 | 0.339306 | 17.99046 | 0.338386 | 1 |
| ATP4A    | 2 | 5318.7823   | 2.436027 | 0.587532 | 10.10026 | 0.207266 | 1 |
| ATP4B    | 1 | 1656.719812 | 3.866758 | 0.530922 | 28.162   | 0.232451 | 1 |
| ATP5J2-P | 1 | 4716.404101 | 1.341633 | 0.184281 | 9.767549 | 0.531066 | 1 |
| ATP6V0A2 | 1 | 10795.11372 | 0.571723 | 0.078539 | 4.161862 | 1        | 1 |
| ATP6V0E1 | 1 | 43.64049885 | 147.7411 | 19.85463 | 1099.363 | 0.007132 | 1 |
| ATP7A    | 1 | 2569.342298 | 2.48419  | 0.34116  | 18.08886 | 0.336896 | 1 |
| ATP8A1   | 1 | 1820.883947 | 3.515834 | 0.482764 | 25.60484 | 0.252347 | 1 |
| ATPIF1   | 1 | 90.1990228  | 71.46754 | 9.714028 | 525.7973 | 0.014371 | 1 |
| ATXN2    | 1 | 1430.26787  | 4.483036 | 0.615482 | 32.65343 | 0.204058 | 1 |
| ATXN2L   | 4 | 3799.811575 | 7.242938 | 2.576726 | 20.35923 | 0.003093 | 1 |
| AVEN     | 1 | 5453.467889 | 1.156839 | 0.158903 | 8.421952 | 0.583938 | 1 |
| AVL9     | 1 | 742.5655781 | 8.658596 | 1.188007 | 63.10679 | 0.111746 | 1 |
| AVPR1A   | 1 | 2559.610187 | 2.493733 | 0.34247  | 18.15837 | 0.335936 | 1 |
| AXL      | 1 | 2236.550349 | 2.857645 | 0.392426 | 20.80938 | 0.300587 | 1 |
| AZ11     | 1 | 4728.591956 | 1.338109 | 0.183798 | 9.741887 | 0.532053 | 1 |
| B3GALT6  | 1 | 505.9670166 | 12.71949 | 1.744121 | 92.76042 | 0.077541 | 1 |
| B3GNT8   | 1 | 939.7310406 | 6.836552 | 0.938269 | 49.8135  | 0.139234 | 1 |
| B9D2     | 1 | 205.4306144 | 31.36508 | 4.288844 | 229.3784 | 0.032243 | 1 |
| BAAT     | 1 | 925.3469708 | 6.943221 | 0.952893 | 50.59154 | 0.137171 | 1 |
| BACH1    | 1 | 819.9882269 | 7.838637 | 1.075636 | 57.12362 | 0.122591 | 1 |
| BACH2    | 1 | 5162.293416 | 1.223535 | 0.168063 | 8.907602 | 0.563795 | 1 |
| BAI2     | 1 | 4475.798179 | 1.415133 | 0.194375 | 10.30277 | 0.512475 | 1 |
| BAIAP3   | 3 | 6725.614839 | 2.950845 | 0.909604 | 9.572835 | 0.091109 | 1 |
| BANK1    | 2 | 4169.973314 | 3.121641 | 0.752839 | 12.94386 | 0.142215 | 1 |
| BAZ2A    | 1 | 1500.678639 | 4.271492 | 0.586458 | 31.1116  | 0.213047 | 1 |

|          |   |             |          |          |          |          |   |
|----------|---|-------------|----------|----------|----------|----------|---|
| BAZ2B    | 2 | 10123.46066 | 1.254889 | 0.302696 | 5.202397 | 0.675669 | 1 |
| BBS12    | 2 | 2772.179838 | 4.722178 | 1.138651 | 19.58367 | 0.072007 | 1 |
| BBS5     | 1 | 2871.239794 | 2.220293 | 0.304931 | 16.16663 | 0.368323 | 1 |
| BCAN     | 2 | 8061.191688 | 1.589388 | 0.383369 | 6.589354 | 0.368488 | 1 |
| BCCIP    | 1 | 110.7964094 | 58.17674 | 7.923223 | 427.1663 | 0.017658 | 1 |
| BCHE     | 3 | 3772.915569 | 5.323643 | 1.640712 | 17.27371 | 0.022104 | 1 |
| BCKDHA   | 1 | 2856.249991 | 2.23208  | 0.306549 | 16.25248 | 0.366797 | 1 |
| BCL2L14  | 1 | 13651.02399 | 0.44675  | 0.061372 | 3.252055 | 0.724329 | 1 |
| BCL9     | 1 | 999.7411701 | 6.424644 | 0.881792 | 46.8093  | 0.14744  | 1 |
| BCO2     | 1 | 3844.073835 | 1.651906 | 0.226889 | 12.02701 | 0.460014 | 1 |
| BCR      | 1 | 2156.511088 | 2.964659 | 0.407115 | 21.589   | 0.291552 | 1 |
| BDH2     | 1 | 3415.721293 | 1.862281 | 0.255776 | 13.55911 | 0.421403 | 1 |
| BEST2    | 1 | 2913.915041 | 2.187401 | 0.300415 | 15.92705 | 0.372678 | 1 |
| BICC1    | 1 | 2513.403758 | 2.540049 | 0.348829 | 18.49576 | 0.330903 | 1 |
| BIN2     | 1 | 3919.856956 | 1.619474 | 0.222435 | 11.79082 | 0.466603 | 1 |
| BLOC1S3  | 1 | 6827.862786 | 0.918815 | 0.126213 | 6.688865 | 1        | 1 |
| BLVRA    | 2 | 2314.626971 | 5.666057 | 1.366115 | 23.50036 | 0.052536 | 1 |
| BLZF1    | 1 | 2140.572265 | 2.986925 | 0.410171 | 21.75121 | 0.289732 | 1 |
| BMP1     | 2 | 2392.2683   | 5.480457 | 1.321391 | 22.73014 | 0.055664 | 1 |
| BMP10    | 1 | 1991.82066  | 3.211907 | 0.441051 | 23.39035 | 0.272557 | 1 |
| BMP2K    | 3 | 8969.997093 | 2.192227 | 0.675799 | 7.111371 | 0.170429 | 1 |
| BMP3     | 3 | 6606.845838 | 3.005349 | 0.926401 | 9.749694 | 0.087461 | 1 |
| BMPER    | 1 | 1948.567413 | 3.283773 | 0.450915 | 23.91396 | 0.267526 | 1 |
| BMPR2    | 1 | 678.400297  | 9.479979 | 1.300545 | 69.10182 | 0.10249  | 1 |
| BMS1     | 1 | 7983.884698 | 0.782063 | 0.10743  | 5.69321  | 1        | 1 |
| BOC      | 1 | 2139.404843 | 2.988569 | 0.410397 | 21.76319 | 0.289504 | 1 |
| BOD1L1   | 2 | 4657.394706 | 2.789436 | 0.672745 | 11.56598 | 0.169254 | 1 |
| BPIFB3   | 1 | 4475.305109 | 1.415292 | 0.194397 | 10.30393 | 0.512396 | 1 |
| BRAT1    | 1 | 3417.245633 | 1.861439 | 0.25566  | 13.55297 | 0.421496 | 1 |
| BRCA2    | 1 | 5408.303888 | 1.166713 | 0.160259 | 8.493854 | 0.580884 | 1 |
| BRD4     | 3 | 3863.721296 | 5.19662  | 1.601581 | 16.86138 | 0.023508 | 1 |
| BRD8     | 2 | 4926.378828 | 2.634257 | 0.635329 | 10.92238 | 0.184557 | 1 |
| BRD9     | 1 | 377.2077267 | 17.07002 | 2.339149 | 124.5691 | 0.058387 | 1 |
| BRIP1    | 1 | 1689.821973 | 3.79051  | 0.520459 | 27.60636 | 0.236496 | 1 |
| BRPF3    | 2 | 2874.301214 | 4.552533 | 1.097764 | 18.8798  | 0.076633 | 1 |
| BSG      | 1 | 1974.761126 | 3.239876 | 0.44489  | 23.59413 | 0.270572 | 1 |
| BSN      | 2 | 7633.990651 | 1.681276 | 0.405529 | 6.970373 | 0.343716 | 1 |
| BTD      | 4 | 9275.751884 | 2.901475 | 1.032518 | 8.153424 | 0.05909  | 1 |
| BTN3A1   | 1 | 1450.546518 | 4.420004 | 0.606834 | 32.19402 | 0.206727 | 1 |
| BTNL2    | 1 | 7140.665851 | 0.877442 | 0.12053  | 6.387637 | 1        | 1 |
| BTNL8    | 2 | 7555.340048 | 1.699326 | 0.409882 | 7.045219 | 0.339102 | 1 |
| BUD13    | 1 | 4324.81664  | 1.465432 | 0.201282 | 10.66905 | 0.500412 | 1 |
| C10ORF2  | 1 | 227.0715258 | 28.37341 | 3.881503 | 207.4069 | 0.035626 | 1 |
| C11ORF31 | 1 | 1297.614242 | 4.943953 | 0.678715 | 36.01314 | 0.18708  | 1 |
| C11ORF4C | 1 | 1321.118643 | 4.855537 | 0.666586 | 35.36862 | 0.190063 | 1 |
| C11ORF82 | 1 | 8723.898296 | 0.713549 | 0.09802  | 5.194391 | 1        | 1 |
| C14ORF37 | 1 | 1021.129884 | 6.289535 | 0.863265 | 45.82399 | 0.150294 | 1 |
| C16ORF11 | 1 | 3992.503565 | 1.58954  | 0.218325 | 11.57283 | 0.472857 | 1 |
| C16ORF62 | 3 | 4121.455689 | 4.86658  | 1.499903 | 15.79009 | 0.027733 | 1 |
| C16ORF71 | 1 | 559.3187116 | 11.50377 | 1.577707 | 83.87916 | 0.0853   | 1 |
| C16ORF7E | 1 | 5471.058287 | 1.153037 | 0.158381 | 8.394269 | 0.585154 | 1 |
| C16ORF9E | 2 | 7881.077911 | 1.626914 | 0.392419 | 6.74496  | 0.358082 | 1 |
| C17ORF1C | 1 | 4719.396958 | 1.340766 | 0.184162 | 9.761235 | 0.531294 | 1 |
| C17ORF64 | 1 | 611.4987999 | 10.51995 | 1.442992 | 76.69436 | 0.092851 | 1 |
| C17ORF8C | 1 | 566.096154  | 11.36574 | 1.558808 | 82.87098 | 0.08632  | 1 |
| C17ORF8E | 1 | 7397.927658 | 0.846038 | 0.116217 | 6.158988 | 1        | 1 |
| C19ORF6E | 1 | 193.5398534 | 33.29367 | 4.551245 | 243.5529 | 0.030548 | 1 |
| C19ORF77 | 2 | 2365.882215 | 5.542166 | 1.336261 | 22.98622 | 0.054601 | 1 |
| C1ORF10E | 2 | 4629.138333 | 2.806784 | 0.676927 | 11.63794 | 0.167675 | 1 |
| C1ORF12E | 1 | 1268.829821 | 5.056692 | 0.694181 | 36.83498 | 0.183302 | 1 |
| C1ORF127 | 1 | 337.6022574 | 19.07558 | 2.61319  | 139.2466 | 0.05252  | 1 |
| C1ORF167 | 1 | 6032.132043 | 1.043403 | 0.143324 | 7.595995 | 0.621354 | 1 |
| C1ORF16E | 1 | 17053.44289 | 0.352501 | 0.048425 | 2.565945 | 0.521904 | 1 |
| C1ORF204 | 1 | 5192.678342 | 1.216226 | 0.167059 | 8.854377 | 0.565986 | 1 |
| C1ORF35  | 1 | 2345.667014 | 2.72352  | 0.374015 | 19.83227 | 0.312716 | 1 |
| C1ORF50  | 4 | 3539.645434 | 7.783465 | 2.768922 | 21.87939 | 0.0024   | 1 |
| C1ORF63  | 2 | 10553.83676 | 1.201569 | 0.289836 | 4.981323 | 0.684628 | 1 |
| C1QTNF6  | 1 | 6543.346005 | 0.959882 | 0.131853 | 6.987869 | 1        | 1 |
| C20ORF1E | 2 | 1459.469586 | 9.016849 | 2.173265 | 37.41079 | 0.022727 | 1 |
| C20ORF1E | 1 | 594.6874366 | 10.81806 | 1.483817 | 78.87126 | 0.090534 | 1 |
| C20ORF2E | 2 | 3454.895308 | 3.778637 | 0.911224 | 15.66914 | 0.104634 | 1 |
| C21ORF3E | 2 | 3146.083081 | 4.154705 | 1.001875 | 17.22927 | 0.08941  | 1 |
| C2CD3    | 1 | 13887.46592 | 0.438707 | 0.060267 | 3.193505 | 0.725276 | 1 |

|          |   |             |          |          |          |          |   |
|----------|---|-------------|----------|----------|----------|----------|---|
| C2ORF16  | 1 | 1359.110977 | 4.71909  | 0.647868 | 34.37401 | 0.194969 | 1 |
| C2ORF57  | 1 | 6457.011236 | 0.973059 | 0.133663 | 7.083811 | 1        | 1 |
| C2ORF61  | 1 | 4972.004666 | 1.271344 | 0.174629 | 9.255725 | 0.550134 | 1 |
| C2ORF80  | 1 | 247.0420184 | 26.07767 | 3.568671 | 190.5597 | 0.038692 | 1 |
| C2ORF81  | 1 | 2812.59744  | 2.267121 | 0.31136  | 16.50771 | 0.362402 | 1 |
| C3ORF17  | 2 | 22355.56458 | 0.539464 | 0.130136 | 2.236295 | 0.578515 | 1 |
| C4ORF45  | 1 | 2456.491181 | 2.599492 | 0.356989 | 18.92877 | 0.324749 | 1 |
| C5ORF47  | 3 | 7218.520343 | 2.743815 | 0.8458   | 8.901061 | 0.106887 | 1 |
| C6ORF201 | 1 | 3345.715719 | 1.901784 | 0.2612   | 13.84681 | 0.414837 | 1 |
| C6ORF52  | 1 | 211.7616088 | 30.4266  | 4.161101 | 222.4839 | 0.033321 | 1 |
| C6ORF57  | 1 | 3796.873186 | 1.672761 | 0.229753 | 12.17888 | 0.4559   | 1 |
| C6ORF89  | 1 | 526.1744209 | 12.23002 | 1.677127 | 89.18428 | 0.080476 | 1 |
| C7ORF34  | 1 | 1493.51603  | 4.2921   | 0.589285 | 31.2618  | 0.212165 | 1 |
| C7ORF72  | 1 | 472.2528637 | 13.62936 | 1.86863  | 99.40949 | 0.07253  | 1 |
| C8A      | 1 | 8500.647638 | 0.732962 | 0.100686 | 5.335728 | 1        | 1 |
| C8ORF76  | 1 | 2651.907949 | 2.406048 | 0.330433 | 17.51966 | 0.345682 | 1 |
| C9ORF89  | 1 | 749.551717  | 8.577655 | 1.176915 | 62.5161  | 0.112737 | 1 |
| CABIN1   | 2 | 9582.366215 | 1.328722 | 0.320503 | 5.508527 | 0.664991 | 1 |
| CABP2    | 1 | 387.0944771 | 16.63338 | 2.279464 | 121.3747 | 0.059885 | 1 |
| CACNA1A  | 1 | 1149.383533 | 5.584858 | 0.766626 | 40.68558 | 0.16749  | 1 |
| CACNA1B  | 1 | 1358.219997 | 4.722202 | 0.648295 | 34.3967  | 0.194841 | 1 |
| CACNA1F  | 3 | 6820.318839 | 2.908745 | 0.896629 | 9.436227 | 0.094035 | 1 |
| CACNA1I  | 1 | 1462.365771 | 4.384073 | 0.601905 | 31.93214 | 0.208122 | 1 |
| CACNA1S  | 1 | 6900.087559 | 0.908929 | 0.124855 | 6.616888 | 1        | 1 |
| CACNA2D  | 2 | 9838.792037 | 1.29272  | 0.31182  | 5.359253 | 0.669975 | 1 |
| CALCOCO  | 1 | 2070.458656 | 3.088942 | 0.424174 | 22.49446 | 0.281598 | 1 |
| CAMSAP1  | 1 | 1856.570359 | 3.447761 | 0.473422 | 25.10882 | 0.256647 | 1 |
| CAMTA1   | 1 | 1141.209931 | 5.625042 | 0.772138 | 40.97857 | 0.166425 | 1 |
| CAND2    | 2 | 8904.268304 | 1.433917 | 0.345874 | 5.944705 | 0.65279  | 1 |
| CAPN1    | 2 | 2271.100241 | 5.775659 | 1.392525 | 23.95521 | 0.050779 | 1 |
| CAPN12   | 1 | 6848.450993 | 0.915976 | 0.125823 | 6.668193 | 1        | 1 |
| CAPN13   | 2 | 4645.387173 | 2.796782 | 0.674516 | 11.59645 | 0.168577 | 1 |
| CAPN14   | 1 | 8816.301897 | 0.705801 | 0.096955 | 5.137986 | 1        | 1 |
| CAPN15   | 1 | 1226.957437 | 5.230137 | 0.717972 | 38.09942 | 0.177802 | 1 |
| CAPN2    | 1 | 1836.172741 | 3.486346 | 0.478717 | 25.38997 | 0.254142 | 1 |
| CAPN9    | 2 | 6930.456523 | 1.85729  | 0.447976 | 7.700248 | 0.302338 | 1 |
| CAPRIN1  | 1 | 176.422598  | 36.52645 | 4.990751 | 267.3309 | 0.027766 | 1 |
| CAPRIN2  | 1 | 2850.480957 | 2.236649 | 0.307176 | 16.28576 | 0.366186 | 1 |
| CAPS     | 2 | 5304.463805 | 2.442744 | 0.589152 | 10.12812 | 0.206393 | 1 |
| CAPS2    | 1 | 1571.020921 | 4.079088 | 0.560058 | 29.70937 | 0.221813 | 1 |
| CAPZA3   | 1 | 5543.122252 | 1.137713 | 0.156277 | 8.282692 | 0.589982 | 1 |
| CARD14   | 2 | 4595.631723 | 2.827632 | 0.681954 | 11.7244  | 0.165817 | 1 |
| CASC3    | 1 | 1973.665215 | 3.241689 | 0.445139 | 23.60734 | 0.270455 | 1 |
| CASKIN1  | 2 | 4214.328112 | 3.088232 | 0.744784 | 12.80529 | 0.144617 | 1 |
| CASP6    | 1 | 321.404655  | 20.03821 | 2.744666 | 146.2946 | 0.049951 | 1 |
| CAST     | 1 | 3067.321208 | 2.07672  | 0.285219 | 15.1209  | 0.387937 | 1 |
| CASZ1    | 1 | 4804.488231 | 1.316565 | 0.180839 | 9.585015 | 0.537708 | 1 |
| CATSPER3 | 1 | 341.2605685 | 18.87082 | 2.585218 | 137.7476 | 0.052972 | 1 |
| CATSPERC | 1 | 2901.826099 | 2.19662  | 0.301681 | 15.9942  | 0.371466 | 1 |
| CAV2     | 1 | 226.3039475 | 28.46973 | 3.894624 | 208.114  | 0.035473 | 1 |
| CBR3     | 1 | 624.602247  | 10.29871 | 1.412692 | 75.07899 | 0.094873 | 1 |
| CC2D1B   | 1 | 1545.787326 | 4.146094 | 0.569252 | 30.1977  | 0.218693 | 1 |
| CC2D2A   | 1 | 4725.578116 | 1.338978 | 0.183917 | 9.74822  | 0.531825 | 1 |
| CCAR2    | 1 | 1420.291949 | 4.514704 | 0.619827 | 32.88425 | 0.202784 | 1 |
| CCBE1    | 1 | 1511.806655 | 4.239862 | 0.582118 | 30.88108 | 0.214431 | 1 |
| CCDC105  | 1 | 3672.639101 | 1.730212 | 0.237641 | 12.59728 | 0.444899 | 1 |
| CCDC116  | 1 | 28572.51733 | 0.200052 | 0.027483 | 1.456198 | 0.08192  | 1 |
| CCDC120  | 1 | 608.9444757 | 10.56418 | 1.44905  | 77.01736 | 0.092561 | 1 |
| CCDC125  | 1 | 1830.385008 | 3.497451 | 0.480241 | 25.47089 | 0.253425 | 1 |
| CCDC130  | 2 | 5398.827187 | 2.399129 | 0.578635 | 9.947237 | 0.21193  | 1 |
| CCDC136  | 1 | 11848.17749 | 0.51863  | 0.071246 | 3.775337 | 1        | 1 |
| CCDC141  | 3 | 11444.37199 | 1.700718 | 0.524302 | 5.516746 | 0.42881  | 1 |
| CCDC147  | 1 | 3186.58501  | 1.998035 | 0.274415 | 14.54782 | 0.399652 | 1 |
| CCDC150  | 1 | 1983.708544 | 3.225147 | 0.442869 | 23.48682 | 0.271624 | 1 |
| CCDC152  | 1 | 1167.200514 | 5.499216 | 0.75488  | 40.06116 | 0.169881 | 1 |
| CCDC158  | 1 | 1693.494792 | 3.782233 | 0.519323 | 27.54605 | 0.236863 | 1 |
| CCDC180  | 1 | 10228.87204 | 0.604792 | 0.083081 | 4.402606 | 1        | 1 |
| CCDC183  | 1 | 1263.49716  | 5.078142 | 0.697123 | 36.99135 | 0.182519 | 1 |
| CCDC28B  | 1 | 9717.507568 | 0.637967 | 0.087638 | 4.644129 | 1        | 1 |
| CCDC51   | 1 | 1654.088312 | 3.872951 | 0.531772 | 28.20713 | 0.232083 | 1 |
| CCDC60   | 1 | 6855.051239 | 0.915069 | 0.125698 | 6.661592 | 1        | 1 |
| CCDC62   | 3 | 10216.53471 | 1.914857 | 0.590307 | 6.211471 | 0.221081 | 1 |
| CCDC64B  | 1 | 7019.121913 | 0.89308  | 0.122678 | 6.501494 | 1        | 1 |

|          |   |             |          |          |          |          |   |
|----------|---|-------------|----------|----------|----------|----------|---|
| CCDC68   | 1 | 6819.172951 | 0.920018 | 0.126378 | 6.697628 | 1        | 1 |
| CCDC74A  | 1 | 4061.442582 | 1.562124 | 0.21456  | 11.37318 | 0.478619 | 1 |
| CCDC74B  | 2 | 1727.56904  | 7.609367 | 1.834294 | 31.56663 | 0.031031 | 1 |
| CCDC81   | 1 | 5905.663117 | 1.066297 | 0.146468 | 7.762686 | 0.613502 | 1 |
| CCDC88A  | 1 | 5306.418226 | 1.189607 | 0.163404 | 8.660553 | 0.573879 | 1 |
| CCDC89   | 1 | 1743.572233 | 3.672867 | 0.504314 | 26.74909 | 0.243069 | 1 |
| CCDC94   | 1 | 916.2346596 | 7.012529 | 0.962395 | 51.09708 | 0.13593  | 1 |
| CCNDBP1  | 1 | 1116.529052 | 5.74995  | 0.789269 | 41.88931 | 0.163223 | 1 |
| CPCG1    | 2 | 952.8133117 | 13.83952 | 3.334    | 57.44825 | 0.010208 | 1 |
| CCR5     | 1 | 4303.120553 | 1.472949 | 0.202315 | 10.72379 | 0.498631 | 1 |
| CCRN4L   | 1 | 4123.738797 | 1.538138 | 0.211266 | 11.1985  | 0.483903 | 1 |
| CCSER1   | 1 | 3552.597993 | 1.789542 | 0.245788 | 13.02936 | 0.434046 | 1 |
| CCSER2   | 2 | 597.8565301 | 22.08752 | 5.316505 | 91.76299 | 0.004172 | 1 |
| CD109    | 1 | 17736.13648 | 0.337945 | 0.046426 | 2.459988 | 0.527544 | 1 |
| CD163L1  | 2 | 5336.50135  | 2.427763 | 0.58554  | 10.06599 | 0.208315 | 1 |
| CD247    | 1 | 187.3828566 | 34.38848 | 4.700134 | 251.6029 | 0.029467 | 1 |
| CD33     | 1 | 386.3345468 | 16.66615 | 2.283943 | 121.6145 | 0.059735 | 1 |
| CD34     | 1 | 1457.227386 | 4.399623 | 0.604038 | 32.04547 | 0.207488 | 1 |
| CDAN1    | 1 | 2621.998015 | 2.433787 | 0.334241 | 17.72171 | 0.342519 | 1 |
| CDC25C   | 3 | 7010.60276  | 2.827594 | 0.87162  | 9.172907 | 0.100102 | 1 |
| CDC42BP1 | 1 | 784.7849963 | 8.191406 | 1.123984 | 59.69757 | 0.117677 | 1 |
| CDC42EP4 | 1 | 392.7542085 | 16.39332 | 2.246646 | 119.6187 | 0.060783 | 1 |
| CDC6     | 1 | 4127.375575 | 1.53676  | 0.211077 | 11.18847 | 0.484153 | 1 |
| CDC7     | 1 | 1084.361911 | 5.921281 | 0.812766 | 43.13859 | 0.158801 | 1 |
| CDH19    | 1 | 5556.765128 | 1.134857 | 0.155884 | 8.261895 | 0.590914 | 1 |
| CDH23    | 1 | 3100.529776 | 2.054202 | 0.282127 | 14.9569  | 0.391279 | 1 |
| CDHR2    | 4 | 21726.47131 | 1.175062 | 0.418205 | 3.301659 | 0.774924 | 1 |
| CDK5RAP2 | 5 | 10509.79093 | 3.275669 | 1.283075 | 8.362731 | 0.024862 | 1 |
| CDK7     | 1 | 4225.843621 | 1.500354 | 0.206078 | 10.92335 | 0.492346 | 1 |
| CDKL1    | 1 | 414.4192509 | 15.53497 | 2.129286 | 113.3409 | 0.06392  | 1 |
| CDKN1A   | 1 | 712.2834528 | 9.027799 | 1.238595 | 65.80131 | 0.107343 | 1 |
| CDRT1    | 1 | 2441.625456 | 2.615475 | 0.359183 | 19.0452  | 0.323229 | 1 |
| CDSN     | 2 | 8042.200561 | 1.593265 | 0.384304 | 6.605433 | 0.367392 | 1 |
| CELA1    | 1 | 1331.855433 | 4.816187 | 0.661188 | 35.08179 | 0.191486 | 1 |
| CELSR2   | 3 | 7132.149836 | 2.778024 | 0.856343 | 9.012063 | 0.104027 | 1 |
| CEP164   | 1 | 2443.209129 | 2.613763 | 0.358948 | 19.03273 | 0.323338 | 1 |
| CEP170   | 1 | 3577.793403 | 1.776759 | 0.244033 | 12.93626 | 0.436324 | 1 |
| CEP290   | 2 | 17967.19875 | 0.684079 | 0.165019 | 2.835825 | 1        | 1 |
| CEP350   | 1 | 26318.37132 | 0.219382 | 0.030139 | 1.596911 | 0.120684 | 1 |
| CEP57    | 2 | 1967.82681  | 6.673891 | 1.608944 | 27.68327 | 0.039297 | 1 |
| CEP63    | 2 | 1333.791937 | 9.871429 | 2.379031 | 40.96    | 0.01924  | 1 |
| CEP68    | 1 | 3389.263028 | 1.877019 | 0.257799 | 13.66644 | 0.418879 | 1 |
| CERKL    | 1 | 1446.643944 | 4.431997 | 0.60848  | 32.28143 | 0.20622  | 1 |
| CES1     | 1 | 13511.87181 | 0.451614 | 0.06204  | 3.287471 | 0.723851 | 1 |
| CES2     | 1 | 831.0347284 | 7.734101 | 1.061308 | 56.36094 | 0.124129 | 1 |
| CES3     | 1 | 6183.03751  | 1.017312 | 0.139741 | 7.406019 | 1        | 1 |
| CES5A    | 2 | 8907.238324 | 1.433422 | 0.345755 | 5.94265  | 0.65284  | 1 |
| CFB      | 3 | 10280.95494 | 1.90235  | 0.586452 | 6.170896 | 0.223768 | 1 |
| CFD      | 1 | 4336.822825 | 1.461304 | 0.200715 | 10.63899 | 0.501381 | 1 |
| CFDP1    | 1 | 605.3841323 | 10.62646 | 1.457579 | 77.47213 | 0.091983 | 1 |
| CFHR2    | 2 | 12327.0044  | 1.02116  | 0.246323 | 4.233325 | 1        | 1 |
| CFTR     | 5 | 11299.33669 | 3.036799 | 1.189526 | 7.752792 | 0.032599 | 1 |
| CGB2     | 1 | 5254.235102 | 1.201677 | 0.165061 | 8.748437 | 0.570264 | 1 |
| CGN      | 1 | 14165.89208 | 0.42958  | 0.059014 | 3.127065 | 0.726608 | 1 |
| CGNL1    | 1 | 2677.636657 | 2.382683 | 0.327225 | 17.34946 | 0.348411 | 1 |
| CGRRF1   | 1 | 1887.710393 | 3.390463 | 0.465558 | 24.69133 | 0.26033  | 1 |
| CHAC2    | 1 | 930.8256905 | 6.902203 | 0.947269 | 50.29235 | 0.137997 | 1 |
| CHD1     | 1 | 2648.164336 | 2.409486 | 0.330905 | 17.5447  | 0.345261 | 1 |
| CHD2     | 1 | 380.2677465 | 16.93245 | 2.320345 | 123.5626 | 0.058836 | 1 |
| CHD6     | 1 | 5913.244793 | 1.064897 | 0.146276 | 7.752492 | 0.613942 | 1 |
| CHGA     | 1 | 2532.674586 | 2.520527 | 0.346149 | 18.35355 | 0.333049 | 1 |
| CHM      | 1 | 1313.153509 | 4.885145 | 0.670648 | 35.58445 | 0.189027 | 1 |
| CHPT1    | 1 | 2072.452564 | 3.085945 | 0.423763 | 22.47263 | 0.281828 | 1 |
| CHRD12   | 2 | 4254.068962 | 3.058891 | 0.73771  | 12.68359 | 0.146808 | 1 |
| CHRNA5   | 1 | 9662.122903 | 0.641771 | 0.08816  | 4.671823 | 1        | 1 |
| CHRND    | 1 | 2585.610935 | 2.468398 | 0.338992 | 17.97383 | 0.338705 | 1 |
| CHRNE    | 1 | 967.089286  | 6.642425 | 0.911653 | 48.39761 | 0.142936 | 1 |
| CIAO1    | 1 | 524.2546086 | 12.2749  | 1.68327  | 89.51216 | 0.080183 | 1 |
| CIAPIN1  | 1 | 656.1467087 | 9.802367 | 1.344708 | 71.45524 | 0.099336 | 1 |
| CIDEC    | 1 | 6199.121821 | 1.014606 | 0.139369 | 7.386316 | 1        | 1 |
| CILP2    | 1 | 1458.556854 | 4.395589 | 0.603485 | 32.01607 | 0.207742 | 1 |
| CITED4   | 1 | 3255.532558 | 1.955176 | 0.268531 | 14.23567 | 0.406288 | 1 |
| CKAP2    | 1 | 1784.457702 | 3.588127 | 0.492685 | 26.1316  | 0.247903 | 1 |

|          |   |             |          |          |          |          |   |
|----------|---|-------------|----------|----------|----------|----------|---|
| CKAP5    | 2 | 1356.403437 | 9.705993 | 2.3392   | 40.27286 | 0.019836 | 1 |
| CKMT1B   | 1 | 279.0395175 | 23.0844  | 3.160465 | 168.6111 | 0.043577 | 1 |
| CLASP2   | 1 | 2255.652175 | 2.833229 | 0.389074 | 20.6315  | 0.302716 | 1 |
| CLCA1    | 1 | 2446.289002 | 2.61044  | 0.358492 | 19.00852 | 0.323664 | 1 |
| CLCA2    | 1 | 1223.717585 | 5.244051 | 0.719881 | 38.20086 | 0.177407 | 1 |
| CLCNKB   | 1 | 7693.350382 | 0.812565 | 0.11162  | 5.915287 | 1        | 1 |
| CLDN16   | 1 | 1870.255622 | 3.422345 | 0.469933 | 24.92363 | 0.258194 | 1 |
| CLEC4G   | 1 | 103.1588456 | 62.48587 | 8.504616 | 459.1017 | 0.016407 | 1 |
| CLHC1    | 1 | 9521.243525 | 0.651646 | 0.089517 | 4.743717 | 1        | 1 |
| CLIC5    | 2 | 5826.633198 | 2.219115 | 0.535228 | 9.200695 | 0.237053 | 1 |
| CLIP1    | 2 | 3245.327127 | 4.026042 | 0.970862 | 16.6955  | 0.09421  | 1 |
| CLK4     | 1 | 1267.704605 | 5.061203 | 0.694799 | 36.86787 | 0.183172 | 1 |
| CLN8     | 1 | 338.0785003 | 19.04867 | 2.609515 | 139.0496 | 0.05252  | 1 |
| CLPS     | 2 | 5782.375932 | 2.236502 | 0.539421 | 9.272802 | 0.234401 | 1 |
| CLSPN    | 1 | 3106.549081 | 2.050172 | 0.281574 | 14.92755 | 0.391867 | 1 |
| CLSTN2   | 1 | 2200.20128  | 2.90528  | 0.398964 | 21.1564  | 0.296422 | 1 |
| CLTCL1   | 1 | 11996.27148 | 0.511911 | 0.070323 | 3.726422 | 1        | 1 |
| CMYA5    | 1 | 9483.711464 | 0.654326 | 0.089885 | 4.763231 | 1        | 1 |
| CNGB1    | 2 | 8107.899528 | 1.579928 | 0.381088 | 6.550131 | 0.371195 | 1 |
| CNOT10   | 1 | 2014.104738 | 3.176087 | 0.436135 | 23.12937 | 0.275118 | 1 |
| CNPPD1   | 1 | 5927.603585 | 1.062255 | 0.145913 | 7.733258 | 0.614884 | 1 |
| CNTLN    | 1 | 5776.329745 | 1.090745 | 0.149826 | 7.940703 | 0.605234 | 1 |
| CNTNAP3  | 1 | 5371.126215 | 1.174967 | 0.161393 | 8.553949 | 0.578356 | 1 |
| CNTNAP4  | 1 | 5643.262047 | 1.11707  | 0.153442 | 8.132378 | 0.596597 | 1 |
| CNTRL    | 1 | 5557.83333  | 1.134634 | 0.155854 | 8.260271 | 0.590981 | 1 |
| COCH     | 1 | 1556.022987 | 4.118652 | 0.565486 | 29.9977  | 0.219942 | 1 |
| COL11A1  | 2 | 1743.374812 | 7.539902 | 1.817561 | 31.27824 | 0.031525 | 1 |
| COL11A2  | 1 | 11772.29136 | 0.522138 | 0.071728 | 3.800878 | 1        | 1 |
| COL12A1  | 4 | 14062.07585 | 1.876078 | 0.667666 | 5.271601 | 0.28348  | 1 |
| COL14A1  | 3 | 4324.875201 | 4.633868 | 1.428207 | 15.03475 | 0.031357 | 1 |
| COL1A1   | 1 | 996.4427699 | 6.445995 | 0.884719 | 46.96502 | 0.146896 | 1 |
| COL20A1  | 1 | 5661.225548 | 1.113444 | 0.152944 | 8.105977 | 0.597777 | 1 |
| COL21A1  | 1 | 2268.232334 | 2.817373 | 0.386898 | 20.51599 | 0.304058 | 1 |
| COL27A1  | 1 | 3587.58283  | 1.771841 | 0.243358 | 12.90045 | 0.437233 | 1 |
| COL2A1   | 1 | 1084.278721 | 5.921737 | 0.812828 | 43.14192 | 0.158801 | 1 |
| COL4A6   | 1 | 1879.742826 | 3.404943 | 0.467545 | 24.79683 | 0.259381 | 1 |
| COL5A1   | 2 | 8295.418102 | 1.543024 | 0.372187 | 6.397108 | 0.381925 | 1 |
| COL5A2   | 2 | 1817.598725 | 7.229851 | 1.742876 | 29.99109 | 0.03404  | 1 |
| COL5A3   | 1 | 15043.41848 | 0.403026 | 0.055366 | 2.933755 | 0.732165 | 1 |
| COL6A2   | 1 | 5887.345589 | 1.069694 | 0.146935 | 7.787423 | 0.612304 | 1 |
| COL6A3   | 3 | 11304.27208 | 1.7228   | 0.531109 | 5.588387 | 0.426383 | 1 |
| COL6A5   | 1 | 7079.164013 | 0.885288 | 0.121608 | 6.44476  | 1        | 1 |
| COL6A6   | 5 | 25932.73808 | 1.242573 | 0.48677  | 3.171903 | 0.601346 | 1 |
| COL7A1   | 1 | 5004.130785 | 1.263017 | 0.173485 | 9.195094 | 0.552464 | 1 |
| COL9A1   | 1 | 2879.170144 | 2.214107 | 0.304081 | 16.12157 | 0.369135 | 1 |
| COL9A2   | 1 | 2825.926454 | 2.256306 | 0.309875 | 16.42894 | 0.363734 | 1 |
| COLGALT1 | 1 | 1164.9081   | 5.510088 | 0.756371 | 40.14043 | 0.169615 | 1 |
| COLGALT2 | 1 | 1159.319016 | 5.536776 | 0.760032 | 40.33501 | 0.168819 | 1 |
| COMMD1   | 1 | 4352.063621 | 1.456096 | 0.2      | 10.60107 | 0.50259  | 1 |
| COQ2     | 1 | 189.9839565 | 33.91731 | 4.636063 | 248.1381 | 0.02993  | 1 |
| COQ3     | 1 | 212.7996308 | 30.27806 | 4.140879 | 221.3928 | 0.033475 | 1 |
| CORO1A   | 1 | 861.6303787 | 7.45856  | 1.023539 | 54.35074 | 0.128451 | 1 |
| CORO6    | 1 | 3651.003756 | 1.740617 | 0.23907  | 12.67305 | 0.442925 | 1 |
| CORO7-P. | 1 | 3718.787262 | 1.708423 | 0.234649 | 12.43859 | 0.449005 | 1 |
| CP       | 1 | 9901.435375 | 0.62564  | 0.085945 | 4.554385 | 1        | 1 |
| CPA1     | 1 | 847.6737792 | 7.581785 | 1.04043  | 55.2497  | 0.126502 | 1 |
| CPA3     | 4 | 5014.30229  | 5.461748 | 1.943285 | 15.35065 | 0.008163 | 1 |
| CPAMD8   | 1 | 10302.29519 | 0.600299 | 0.082464 | 4.369896 | 1        | 1 |
| CPEB2    | 1 | 664.4446105 | 9.679631 | 1.327895 | 70.55924 | 0.100484 | 1 |
| CPN2     | 1 | 145.1929137 | 44.38848 | 6.05784  | 325.254  | 0.022958 | 1 |
| CPVL     | 2 | 6757.149395 | 1.906276 | 0.459789 | 7.90338  | 0.292104 | 1 |
| CPZ      | 1 | 3786.700812 | 1.677323 | 0.230379 | 12.21211 | 0.455021 | 1 |
| CR1      | 2 | 3687.441085 | 3.537021 | 0.852979 | 14.66685 | 0.1165   | 1 |
| CRELD2   | 3 | 5692.991259 | 3.500791 | 1.079078 | 11.35741 | 0.061705 | 1 |
| CRHR2    | 1 | 3406.109734 | 1.867608 | 0.256507 | 13.59791 | 0.420469 | 1 |
| CRIM1    | 1 | 570.5883982 | 11.27605 | 1.546529 | 82.21596 | 0.087048 | 1 |
| CRIP1    | 2 | 2379.552562 | 5.510024 | 1.328516 | 22.85284 | 0.055172 | 1 |
| CRISP2   | 2 | 4639.470332 | 2.800416 | 0.675392 | 11.61153 | 0.168238 | 1 |
| CRLF2    | 2 | 4561.570593 | 2.849139 | 0.687139 | 11.81361 | 0.163907 | 1 |
| CROCC    | 7 | 29643.08674 | 1.587544 | 0.702221 | 3.589036 | 0.320218 | 1 |
| CRTAC1   | 1 | 6299.109744 | 0.998093 | 0.137101 | 7.26609  | 1        | 1 |
| CRTAM    | 1 | 1389.623302 | 4.614908 | 0.633575 | 33.61463 | 0.19895  | 1 |
| CRTAP    | 1 | 2465.550349 | 2.589846 | 0.355665 | 18.8585  | 0.325833 | 1 |

|         |   |             |          |          |          |          |   |
|---------|---|-------------|----------|----------|----------|----------|---|
| CRYAA   | 1 | 182.2072525 | 35.36601 | 4.833034 | 258.7928 | 0.028694 | 1 |
| CRYBA4  | 1 | 4488.959533 | 1.410909 | 0.193795 | 10.27201 | 0.5135   | 1 |
| CSF2RB  | 1 | 9210.493589 | 0.674497 | 0.092656 | 4.910079 | 1        | 1 |
| CSMD1   | 1 | 7685.370872 | 0.813436 | 0.111739 | 5.921623 | 1        | 1 |
| CSMD2   | 1 | 6490.378083 | 0.967924 | 0.132958 | 7.046429 | 1        | 1 |
| CSMD3   | 1 | 12026.30607 | 0.510568 | 0.070138 | 3.716649 | 1        | 1 |
| CSNK1G2 | 1 | 170.2860177 | 37.84368 | 5.169709 | 277.026  | 0.026838 | 1 |
| CSPG4   | 1 | 23913.4688  | 0.244024 | 0.033524 | 1.776284 | 0.176424 | 1 |
| CSPG5   | 1 | 395.7818934 | 16.26772 | 2.229475 | 118.7    | 0.061232 | 1 |
| CSRP2BP | 3 | 7754.653073 | 2.54851  | 0.785608 | 8.267354 | 0.125183 | 1 |
| CTC1    | 1 | 3553.192854 | 1.789238 | 0.245746 | 13.02714 | 0.434046 | 1 |
| CTSF    | 2 | 1246.242945 | 10.5686  | 2.546869 | 43.85591 | 0.016936 | 1 |
| CTTNBP2 | 4 | 10001.93378 | 2.682749 | 0.954696 | 7.538673 | 0.073641 | 1 |
| CUBN    | 2 | 23927.7908  | 0.500559 | 0.120751 | 2.075011 | 0.584638 | 1 |
| CUL7    | 2 | 9181.270372 | 1.389068 | 0.335057 | 5.758742 | 0.657591 | 1 |
| CUL9    | 2 | 4346.16939  | 2.992954 | 0.721813 | 12.4101  | 0.151875 | 1 |
| CUX1    | 1 | 3035.642837 | 2.098659 | 0.288231 | 15.28069 | 0.384875 | 1 |
| CUX2    | 1 | 767.1021088 | 8.380822 | 1.149942 | 61.07973 | 0.11514  | 1 |
| CYP1A1  | 1 | 8393.723077 | 0.742625 | 0.102013 | 5.406083 | 1        | 1 |
| CYP20A1 | 1 | 420.0085207 | 15.32789 | 2.100969 | 111.8266 | 0.064814 | 1 |
| CYP27A1 | 2 | 6376.76888  | 2.023127 | 0.487967 | 8.387941 | 0.269589 | 1 |
| CYP2A6  | 1 | 9149.876675 | 0.679135 | 0.093293 | 4.943847 | 1        | 1 |
| CYP2D6  | 1 | 5277.642682 | 1.196233 | 0.164314 | 8.7088   | 0.571936 | 1 |
| CYP2E1  | 2 | 1284.821943 | 10.24968 | 2.470094 | 42.53112 | 0.017942 | 1 |
| CYP3A43 | 3 | 7055.786378 | 2.808968 | 0.86588  | 9.112468 | 0.101555 | 1 |
| CYP4A22 | 2 | 10176.97231 | 1.248014 | 0.301038 | 5.173891 | 0.676772 | 1 |
| CYP4F2  | 1 | 14039.06887 | 0.433693 | 0.059578 | 3.157002 | 0.725974 | 1 |
| CYP4F3  | 1 | 2030.825754 | 3.149725 | 0.432517 | 22.93731 | 0.277091 | 1 |
| CYP7A1  | 1 | 1410.282866 | 4.546928 | 0.624248 | 33.11912 | 0.201508 | 1 |
| DAB2IP  | 1 | 2288.106524 | 2.792679 | 0.383508 | 20.33609 | 0.306288 | 1 |
| DACT3   | 1 | 4065.106509 | 1.560693 | 0.214364 | 11.36275 | 0.478956 | 1 |
| DAPK2   | 1 | 2669.743849 | 2.389802 | 0.328202 | 17.40132 | 0.347572 | 1 |
| DARC    | 2 | 731.2908817 | 18.04773 | 4.34591  | 74.94878 | 0.006147 | 1 |
| DBH     | 1 | 4690.086387 | 1.349305 | 0.185335 | 9.823417 | 0.529086 | 1 |
| DCAF4   | 1 | 2349.692062 | 2.71881  | 0.373368 | 19.79797 | 0.313158 | 1 |
| DCAKD   | 1 | 8971.595338 | 0.69314  | 0.095216 | 5.04581  | 1        | 1 |
| DCC     | 1 | 3509.564709 | 1.811799 | 0.248844 | 13.19145 | 0.430107 | 1 |
| DCDC2B  | 1 | 2714.325368 | 2.35013  | 0.322756 | 17.11235 | 0.352171 | 1 |
| DCHS1   | 1 | 4553.595243 | 1.390518 | 0.190995 | 10.12353 | 0.518595 | 1 |
| DCHS2   | 1 | 4873.841328 | 1.297466 | 0.178216 | 9.44594  | 0.542926 | 1 |
| DCLRE1C | 1 | 1422.655096 | 4.507162 | 0.618792 | 32.82928 | 0.203167 | 1 |
| DCP1B   | 3 | 6807.469006 | 2.914389 | 0.898369 | 9.454539 | 0.093628 | 1 |
| DCST1   | 2 | 1784.307601 | 7.365726 | 1.775606 | 30.55515 | 0.03289  | 1 |
| DDB1    | 1 | 552.8371416 | 11.63894 | 1.596213 | 84.86649 | 0.084425 | 1 |
| DDI1    | 1 | 1383.94798  | 4.633938 | 0.636186 | 33.75333 | 0.198181 | 1 |
| DDIT3   | 1 | 557.9313263 | 11.53244 | 1.581632 | 84.08856 | 0.085154 | 1 |
| DDRK1   | 4 | 5851.162981 | 4.664692 | 1.659781 | 13.10977 | 0.013764 | 1 |
| DDX11   | 1 | 3764.349525 | 1.687435 | 0.231767 | 12.28574 | 0.452994 | 1 |
| DDX19B  | 1 | 2537.847185 | 2.515338 | 0.345436 | 18.31575 | 0.333585 | 1 |
| DDX28   | 1 | 1005.80447  | 6.38576  | 0.87646  | 46.52572 | 0.148257 | 1 |
| DDX31   | 1 | 2505.571171 | 2.54807  | 0.34993  | 18.55418 | 0.33015  | 1 |
| DDX53   | 1 | 2665.00409  | 2.394098 | 0.328792 | 17.43261 | 0.347048 | 1 |
| DDX55   | 1 | 4243.549138 | 1.493987 | 0.205204 | 10.87699 | 0.493822 | 1 |
| DECR2   | 1 | 1114.084734 | 5.762622 | 0.791007 | 41.98171 | 0.162822 | 1 |
| DEF8    | 1 | 476.1629047 | 13.51724 | 1.853288 | 98.58999 | 0.073121 | 1 |
| DEFA4   | 1 | 5145.078444 | 1.227715 | 0.168637 | 8.938036 | 0.56259  | 1 |
| DENND2A | 1 | 1965.377632 | 3.255467 | 0.44703  | 23.70772 | 0.269402 | 1 |
| DENND2C | 1 | 3429.195543 | 1.854863 | 0.254757 | 13.50508 | 0.422614 | 1 |
| DEPDC5  | 1 | 4345.389893 | 1.458372 | 0.200313 | 10.61764 | 0.502027 | 1 |
| DFNB31  | 1 | 3386.688899 | 1.878465 | 0.257998 | 13.67698 | 0.418691 | 1 |
| DFNB59  | 1 | 609.8258485 | 10.54888 | 1.446954 | 76.9056  | 0.092706 | 1 |
| DGAT2   | 1 | 599.9454307 | 10.72303 | 1.470803 | 78.17727 | 0.091258 | 1 |
| DGCR2   | 1 | 699.8544576 | 9.188582 | 1.260624 | 66.97483 | 0.105633 | 1 |
| DGKQ    | 1 | 4096.299173 | 1.548613 | 0.212705 | 11.27479 | 0.481561 | 1 |
| DHODH   | 1 | 7628.63899  | 0.819676 | 0.112596 | 5.967054 | 1        | 1 |
| DHRX    | 1 | 4337.727041 | 1.460994 | 0.200673 | 10.63673 | 0.501462 | 1 |
| DHTKD1  | 3 | 2510.836688 | 8.040342 | 2.477442 | 26.09429 | 0.00748  | 1 |
| DHX33   | 2 | 5555.049925 | 2.330179 | 0.562009 | 9.66129  | 0.221057 | 1 |
| DHX35   | 1 | 11080.47089 | 0.556339 | 0.076426 | 4.049865 | 1        | 1 |
| DHX37   | 4 | 8452.791523 | 3.194779 | 1.136871 | 8.977812 | 0.044694 | 1 |
| DIEXF   | 2 | 5287.690772 | 2.45066  | 0.59106  | 10.16095 | 0.205462 | 1 |
| DIP2B   | 2 | 5360.873905 | 2.416487 | 0.58282  | 10.01922 | 0.209713 | 1 |
| DIS3L   | 1 | 2624.857409 | 2.431108 | 0.333873 | 17.7022  | 0.342836 | 1 |



|           |    |             |          |          |          |          |   |
|-----------|----|-------------|----------|----------|----------|----------|---|
| DIS3L2    | 1  | 4171.741922 | 1.520144 | 0.208795 | 11.06747 | 0.487893 | 1 |
| DKK2      | 1  | 7363.06821  | 0.850164 | 0.116784 | 6.189034 | 1        | 1 |
| DLG1      | 1  | 15971.53425 | 0.378116 | 0.051944 | 2.752416 | 0.516701 | 1 |
| DLG5      | 1  | 1946.791526 | 3.286791 | 0.451329 | 23.93596 | 0.267291 | 1 |
| DLGAP5    | 1  | 22841.39217 | 0.25668  | 0.035262 | 1.868419 | 0.261837 | 1 |
| DLL3      | 1  | 774.2091569 | 8.303653 | 1.139367 | 60.51662 | 0.116128 | 1 |
| DMBT1     | 1  | 25443.61233 | 0.227806 | 0.031296 | 1.658232 | 0.181455 | 1 |
| DMRT2     | 4  | 6643.53452  | 4.095084 | 1.45716  | 11.50849 | 0.020919 | 1 |
| DMWD      | 1  | 4576.127702 | 1.383545 | 0.190037 | 10.07275 | 0.520307 | 1 |
| DMXL2     | 3  | 1991.262314 | 10.15944 | 3.129862 | 32.97725 | 0.003949 | 1 |
| DNAH1     | 12 | 38047.80983 | 2.404285 | 1.222503 | 4.728485 | 0.014198 | 1 |
| DNAH10    | 7  | 35157.35456 | 1.305275 | 0.577371 | 2.950861 | 0.493775 | 1 |
| DNAH12    | 2  | 19143.69308 | 0.638804 | 0.154098 | 2.648126 | 0.767156 | 1 |
| DNAH14    | 1  | 16300.57407 | 0.369966 | 0.050824 | 2.693085 | 0.517768 | 1 |
| DNAH17    | 2  | 4922.820675 | 2.636199 | 0.635798 | 10.93044 | 0.184385 | 1 |
| DNAH2     | 1  | 34461.99022 | 0.161482 | 0.022184 | 1.175434 | 0.036392 | 1 |
| DNAH3     | 2  | 31238.67219 | 0.371094 | 0.089521 | 1.538309 | 0.226875 | 1 |
| DNAH5     | 3  | 13381.6928  | 1.44276  | 0.444787 | 4.679892 | 0.471169 | 1 |
| DNAH6     | 3  | 24933.76595 | 0.736748 | 0.227144 | 2.389663 | 0.794131 | 1 |
| DNAH7     | 1  | 36490.72533 | 0.151078 | 0.020755 | 1.099706 | 0.02397  | 1 |
| DNAH9     | 1  | 25759.78461 | 0.224696 | 0.030868 | 1.635587 | 0.121049 | 1 |
| DNAJA4    | 1  | 3404.226608 | 1.868656 | 0.256651 | 13.60553 | 0.420282 | 1 |
| DNAJC10   | 2  | 6433.053393 | 2.004965 | 0.483588 | 8.312628 | 0.272908 | 1 |
| DNASE1    | 2  | 5933.095903 | 2.178351 | 0.525398 | 9.031646 | 0.243309 | 1 |
| DNASE1L2  | 1  | 697.3572758 | 9.221578 | 1.265144 | 67.21566 | 0.105205 | 1 |
| DNASE2B   | 1  | 3225.86355  | 1.973394 | 0.271032 | 14.36835 | 0.403411 | 1 |
| DNPEP     | 1  | 2821.423217 | 2.259949 | 0.310375 | 16.45547 | 0.363222 | 1 |
| DOCK1     | 1  | 1108.650356 | 5.790995 | 0.794898 | 42.18859 | 0.162153 | 1 |
| DOCK4     | 2  | 2330.748674 | 5.626501 | 1.356584 | 23.33621 | 0.053181 | 1 |
| DOCK5     | 1  | 5392.118825 | 1.170292 | 0.160751 | 8.519914 | 0.579792 | 1 |
| DOCK6     | 1  | 5042.390442 | 1.25324  | 0.172142 | 9.123896 | 0.555215 | 1 |
| DOCK8     | 2  | 5885.086046 | 2.196551 | 0.529787 | 9.107122 | 0.240475 | 1 |
| DOPEY1    | 2  | 1048.18311  | 12.57554 | 3.02989  | 52.19467 | 0.012225 | 1 |
| DOPEY2    | 1  | 8270.293108 | 0.754091 | 0.103588 | 5.489562 | 1        | 1 |
| DPT       | 1  | 4900.923761 | 1.290155 | 0.177212 | 9.3927   | 0.544923 | 1 |
| DPYD      | 2  | 6219.330015 | 2.075673 | 0.500639 | 8.605847 | 0.260228 | 1 |
| DPYS      | 1  | 623.9101375 | 10.31017 | 1.414261 | 75.16261 | 0.094729 | 1 |
| DRD2      | 1  | 7181.910224 | 0.872256 | 0.119818 | 6.349877 | 1        | 1 |
| DRD4      | 1  | 2143.625409 | 2.982634 | 0.409582 | 21.71995 | 0.290073 | 1 |
| DROSHA    | 1  | 1674.855778 | 3.82461  | 0.525138 | 27.85485 | 0.23466  | 1 |
| DSC3      | 1  | 6034.720367 | 1.042945 | 0.143261 | 7.592656 | 0.621539 | 1 |
| DSG1      | 2  | 5352.143272 | 2.420514 | 0.583792 | 10.03593 | 0.209189 | 1 |
| DSG3      | 2  | 7891.917386 | 1.624607 | 0.391863 | 6.735394 | 0.35872  | 1 |
| DSG4      | 1  | 7520.847731 | 0.831791 | 0.11426  | 6.055262 | 1        | 1 |
| DSP       | 4  | 17314.73668 | 1.502774 | 0.534826 | 4.222549 | 0.353413 | 1 |
| DST       | 1  | 13454.97891 | 0.453633 | 0.062318 | 3.302162 | 0.723673 | 1 |
| DTHD1     | 2  | 9626.778118 | 1.322349 | 0.318966 | 5.482104 | 0.665851 | 1 |
| DUSP10    | 1  | 166.803623  | 38.63428 | 5.277087 | 282.8469 | 0.026373 | 1 |
| DVL1      | 1  | 1437.091225 | 4.461628 | 0.612545 | 32.4974  | 0.204949 | 1 |
| DYSF      | 1  | 12325.35805 | 0.497558 | 0.068351 | 3.621936 | 0.722424 | 1 |
| DYTN      | 1  | 3944.137838 | 1.609346 | 0.221045 | 11.71707 | 0.468667 | 1 |
| ECI1      | 1  | 3054.749245 | 2.085372 | 0.286407 | 15.18392 | 0.386754 | 1 |
| ECM1      | 3  | 4664.048214 | 4.290994 | 1.322565 | 13.9219  | 0.037907 | 1 |
| ECT2L     | 2  | 2205.549614 | 5.94888  | 1.434264 | 24.6741  | 0.048223 | 1 |
| EDARADD   | 3  | 5442.653586 | 3.665541 | 1.129846 | 11.89206 | 0.055396 | 1 |
| EDEM3     | 2  | 2854.811039 | 4.583974 | 1.105341 | 19.01025 | 0.075764 | 1 |
| EEF1D     | 1  | 1653.385406 | 3.874608 | 0.531999 | 28.21921 | 0.23196  | 1 |
| EEF2K     | 1  | 1838.906923 | 3.481124 | 0.478    | 25.35192 | 0.2545   | 1 |
| EFCAB4B   | 1  | 1653.123384 | 3.875227 | 0.532084 | 28.22371 | 0.23196  | 1 |
| EFS       | 1  | 4645.144208 | 1.362608 | 0.187162 | 9.920285 | 0.525639 | 1 |
| EGFLAM    | 2  | 7000.958291 | 1.838057 | 0.443338 | 7.620492 | 0.306532 | 1 |
| EHBP1     | 2  | 3085.907185 | 4.236749 | 1.021651 | 17.56965 | 0.086539 | 1 |
| EHBP1L1   | 1  | 3494.134509 | 1.819913 | 0.249958 | 13.25055 | 0.428635 | 1 |
| EHHADH    | 1  | 17245.85747 | 0.348282 | 0.047846 | 2.535232 | 0.523325 | 1 |
| EIF4ENIF1 | 1  | 1436.511781 | 4.463438 | 0.612794 | 32.51059 | 0.204949 | 1 |
| EIF5B     | 1  | 2117.364773 | 3.019944 | 0.414703 | 21.99177 | 0.286992 | 1 |
| ELN       | 1  | 1787.804935 | 3.581361 | 0.491757 | 26.0823  | 0.248385 | 1 |
| ELSPBP1   | 1  | 12764.67591 | 0.479551 | 0.065878 | 3.490847 | 0.722372 | 1 |
| EMID1     | 1  | 4297.104454 | 1.475048 | 0.202603 | 10.73907 | 0.498144 | 1 |
| EML2      | 1  | 8425.938832 | 0.739688 | 0.10161  | 5.384698 | 1        | 1 |
| ENDOG     | 2  | 2842.153205 | 4.604623 | 1.110318 | 19.09592 | 0.075171 | 1 |
| ENDOV     | 1  | 3356.164543 | 1.895783 | 0.260376 | 13.8031  | 0.415779 | 1 |
| ENPP1     | 2  | 9107.383003 | 1.400764 | 0.337878 | 5.807239 | 0.656282 | 1 |

|          |   |             |          |          |          |          |   |
|----------|---|-------------|----------|----------|----------|----------|---|
| ENPP2    | 2 | 2616.562427 | 5.006155 | 1.207091 | 20.76198 | 0.065166 | 1 |
| ENTPD6   | 1 | 650.0861153 | 9.893992 | 1.357258 | 72.12413 | 0.098474 | 1 |
| EP300    | 1 | 2167.330134 | 2.949732 | 0.405066 | 21.48025 | 0.292688 | 1 |
| EP400    | 1 | 13316.3039  | 0.458624 | 0.063003 | 3.338496 | 0.723282 | 1 |
| EPB41    | 1 | 11861.35109 | 0.518025 | 0.071163 | 3.770936 | 1        | 1 |
| EPB41L4A | 1 | 4525.943856 | 1.39917  | 0.192183 | 10.18653 | 0.516407 | 1 |
| EPB41L5  | 1 | 1606.051929 | 3.989556 | 0.547772 | 29.05689 | 0.22616  | 1 |
| EPCAM    | 1 | 857.1272146 | 7.497881 | 1.028929 | 54.63759 | 0.127756 | 1 |
| EPG5     | 2 | 10119.86485 | 1.255353 | 0.302808 | 5.204323 | 0.675608 | 1 |
| EPHA10   | 1 | 4176.794137 | 1.518274 | 0.208539 | 11.05385 | 0.488307 | 1 |
| EPHA2    | 2 | 7161.642747 | 1.795636 | 0.433108 | 7.444584 | 0.31603  | 1 |
| EPHB2    | 1 | 2265.512644 | 2.820786 | 0.387366 | 20.54085 | 0.303834 | 1 |
| EPN3     | 1 | 9417.009061 | 0.659143 | 0.090547 | 4.798296 | 1        | 1 |
| EPS15    | 1 | 5031.42593  | 1.256027 | 0.172525 | 9.144189 | 0.55442  | 1 |
| EPS8L2   | 1 | 6512.883618 | 0.964491 | 0.132486 | 7.021431 | 1        | 1 |
| EPYC     | 3 | 11078.09092 | 1.75963  | 0.542461 | 5.707872 | 0.25776  | 1 |
| ERAP2    | 3 | 25059.79079 | 0.732636 | 0.225876 | 2.376322 | 0.794102 | 1 |
| ERCC2    | 1 | 1736.921072 | 3.687029 | 0.506258 | 26.85229 | 0.24222  | 1 |
| ERCC4    | 1 | 5756.474764 | 1.094596 | 0.150355 | 7.96874  | 0.603947 | 1 |
| ERCC5    | 4 | 12352.32556 | 2.151135 | 0.76554  | 6.044596 | 0.131868 | 1 |
| ERI1     | 1 | 160.5173471 | 40.14831 | 5.482646 | 293.9979 | 0.025443 | 1 |
| ESD      | 1 | 160.9308468 | 40.04508 | 5.468635 | 293.2375 | 0.025443 | 1 |
| ESPNL    | 1 | 12498.73157 | 0.490301 | 0.067354 | 3.569102 | 0.722317 | 1 |
| ESYT1    | 2 | 6201.477458 | 2.0818   | 0.502116 | 8.631254 | 0.259162 | 1 |
| ESYT2    | 1 | 2041.471441 | 3.133167 | 0.430244 | 22.81666 | 0.278249 | 1 |
| ESYT3    | 2 | 2856.832388 | 4.580693 | 1.104551 | 18.99664 | 0.075855 | 1 |
| ETNK1    | 1 | 83.92770596 | 76.80972 | 10.43183 | 565.5511 | 0.013429 | 1 |
| ETS1     | 1 | 723.3837795 | 8.888874 | 1.21956  | 64.78737 | 0.108908 | 1 |
| ETV2     | 1 | 463.4422974 | 13.88896 | 1.904148 | 101.3069 | 0.071199 | 1 |
| ETV4     | 2 | 5195.234638 | 2.495209 | 0.601802 | 10.34571 | 0.200062 | 1 |
| ETV7     | 2 | 6362.83033  | 2.027674 | 0.489064 | 8.406797 | 0.26876  | 1 |
| EVA1C    | 2 | 2258.381535 | 5.808482 | 1.400434 | 24.09143 | 0.050264 | 1 |
| EVPL     | 1 | 13035.35904 | 0.469061 | 0.064437 | 3.414478 | 0.722688 | 1 |
| EXD1     | 1 | 1545.692462 | 4.14635  | 0.569287 | 30.19956 | 0.218693 | 1 |
| EXD3     | 1 | 12100.89004 | 0.507263 | 0.069684 | 3.692589 | 1        | 1 |
| EXO1     | 2 | 9243.340521 | 1.379387 | 0.332723 | 5.7186   | 0.658702 | 1 |
| EXOC3L1  | 2 | 7049.457866 | 1.825049 | 0.440201 | 7.566552 | 0.309366 | 1 |
| EXOG     | 1 | 2357.839257 | 2.709327 | 0.372066 | 19.72888 | 0.314039 | 1 |
| EXOSC10  | 1 | 756.6180353 | 8.497306 | 1.165905 | 61.92975 | 0.113727 | 1 |
| EXOSC8   | 1 | 3116.987757 | 2.04322  | 0.280619 | 14.87691 | 0.392845 | 1 |
| F13B     | 1 | 2202.334764 | 2.90244  | 0.398575 | 21.13571 | 0.296648 | 1 |
| FAH      | 2 | 5331.062598 | 2.430294 | 0.58615  | 10.07649 | 0.207965 | 1 |
| FAHD2B   | 1 | 960.111615  | 6.690886 | 0.918297 | 48.75106 | 0.141978 | 1 |
| FAM110A  | 1 | 3372.333032 | 1.886571 | 0.259111 | 13.73601 | 0.417284 | 1 |
| FAM115A  | 1 | 1053.57371  | 6.095065 | 0.836598 | 44.40583 | 0.15476  | 1 |
| FAM117A  | 1 | 171.6101366 | 37.55148 | 5.130018 | 274.8751 | 0.027147 | 1 |
| FAM129B  | 1 | 830.4201627 | 7.739844 | 1.062095 | 56.40284 | 0.123989 | 1 |
| FAM131C  | 1 | 4108.963629 | 1.543761 | 0.212039 | 11.23945 | 0.482649 | 1 |
| FAM136A  | 1 | 925.9882705 | 6.938395 | 0.952231 | 50.55633 | 0.137308 | 1 |
| FAM13C   | 1 | 1451.190994 | 4.41803  | 0.606564 | 32.17963 | 0.206727 | 1 |
| FAM154A  | 1 | 11523.73788 | 0.533953 | 0.073351 | 3.886892 | 1        | 1 |
| FAM162B  | 1 | 5182.953553 | 1.218556 | 0.167379 | 8.871344 | 0.56528  | 1 |
| FAM166A  | 3 | 8778.642894 | 2.24178  | 0.691072 | 7.272145 | 0.16301  | 1 |
| FAM170A  | 1 | 1094.310039 | 5.867219 | 0.805352 | 42.74438 | 0.160143 | 1 |
| FAM173B  | 1 | 1195.387805 | 5.368939 | 0.737011 | 39.11135 | 0.173586 | 1 |
| FAM175A  | 1 | 1188.445515 | 5.400452 | 0.741334 | 39.3411  | 0.172661 | 1 |
| FAM179B  | 1 | 1607.568996 | 3.985767 | 0.547252 | 29.02927 | 0.226407 | 1 |
| FAM194A  | 3 | 7052.749458 | 2.810212 | 0.866263 | 9.116506 | 0.101457 | 1 |
| FAM205A  | 1 | 16421.36135 | 0.367056 | 0.050425 | 2.671902 | 0.518273 | 1 |
| FAM208B  | 2 | 12367.3002  | 1.017661 | 0.24548  | 4.218819 | 1        | 1 |
| FAM211B  | 1 | 1552.54897  | 4.127925 | 0.566759 | 30.06529 | 0.219568 | 1 |
| FAM217A  | 1 | 2440.200276 | 2.617017 | 0.359395 | 19.05643 | 0.323012 | 1 |
| FAM21C   | 5 | 17657.21935 | 1.891891 | 0.741109 | 4.829588 | 0.201051 | 1 |
| FAM221A  | 1 | 1465.320919 | 4.37518  | 0.600684 | 31.86732 | 0.208502 | 1 |
| FAM26E   | 2 | 1934.014197 | 6.791492 | 1.637275 | 28.17141 | 0.03808  | 1 |
| FAM65A   | 1 | 2441.401788 | 2.615717 | 0.359216 | 19.04696 | 0.32312  | 1 |
| FAM81A   | 1 | 2290.160406 | 2.790151 | 0.383161 | 20.31768 | 0.306511 | 1 |
| FAM81B   | 1 | 1575.649878 | 4.067029 | 0.558403 | 29.62148 | 0.222435 | 1 |
| FAM86B1  | 4 | 21466.24898 | 1.190653 | 0.423754 | 3.345471 | 0.773631 | 1 |
| FAM86B2  | 2 | 15409.65012 | 0.806352 | 0.194512 | 3.342742 | 1        | 1 |
| FAM9A    | 1 | 45.81961109 | 140.7136 | 18.92995 | 1045.978 | 0.007447 | 1 |
| FANCA    | 1 | 2050.62366  | 3.119068 | 0.428309 | 22.71395 | 0.279406 | 1 |
| FANCC    | 2 | 5349.37245  | 2.421795 | 0.5841   | 10.04124 | 0.209014 | 1 |

|         |   |             |          |          |          |          |   |
|---------|---|-------------|----------|----------|----------|----------|---|
| FANCL   | 1 | 1759.635318 | 3.639104 | 0.499681 | 26.50307 | 0.245007 | 1 |
| FANCM   | 1 | 4941.078462 | 1.279462 | 0.175744 | 9.314836 | 0.547866 | 1 |
| FANK1   | 2 | 5281.827143 | 2.453439 | 0.591731 | 10.17247 | 0.205113 | 1 |
| FARP2   | 2 | 8926.910738 | 1.430147 | 0.344965 | 5.929071 | 0.653178 | 1 |
| FARS2   | 2 | 1651.174555 | 7.963863 | 1.919678 | 33.03841 | 0.028546 | 1 |
| FASN    | 2 | 3551.842781 | 3.674063 | 0.886015 | 15.23533 | 0.109552 | 1 |
| FASTKD1 | 1 | 541.0444036 | 11.89319 | 1.631019 | 86.72364 | 0.082672 | 1 |
| FAT1    | 2 | 12312.92546 | 1.022388 | 0.24662  | 4.238416 | 1        | 1 |
| FAT2    | 3 | 19586.23931 | 0.960036 | 0.29598  | 3.113957 | 1        | 1 |
| FAT4    | 4 | 21414.02668 | 1.193828 | 0.424883 | 3.354392 | 0.773385 | 1 |
| FBN3    | 1 | 17592.7346  | 0.340909 | 0.046833 | 2.481562 | 0.526224 | 1 |
| FBXL13  | 1 | 926.5029118 | 6.934526 | 0.951701 | 50.52812 | 0.137446 | 1 |
| FCHSD1  | 1 | 6367.150081 | 0.987154 | 0.135599 | 7.186437 | 1        | 1 |
| FCN1    | 2 | 1996.281231 | 6.578013 | 1.585845 | 27.2853  | 0.040311 | 1 |
| FCRL1   | 1 | 6162.766012 | 1.020742 | 0.140212 | 7.430998 | 1        | 1 |
| FDF1    | 1 | 1300.552875 | 4.932724 | 0.677175 | 35.93128 | 0.187469 | 1 |
| FDPS    | 1 | 1296.459378 | 4.948379 | 0.679323 | 36.04541 | 0.18682  | 1 |
| FFAR3   | 1 | 3123.325756 | 2.039022 | 0.280043 | 14.84634 | 0.393431 | 1 |
| FGD2    | 2 | 1411.028672 | 9.328207 | 2.248238 | 38.70383 | 0.021359 | 1 |
| FGFRL1  | 1 | 5593.315847 | 1.127274 | 0.154843 | 8.206676 | 0.593303 | 1 |
| FGGY    | 1 | 13884.99284 | 0.43879  | 0.060279 | 3.194107 | 0.725267 | 1 |
| FGL1    | 3 | 11069.46045 | 1.761065 | 0.542903 | 5.712528 | 0.257371 | 1 |
| FHL3    | 1 | 1469.770897 | 4.361856 | 0.598856 | 31.77021 | 0.209135 | 1 |
| FHOD1   | 1 | 1224.68807  | 5.239876 | 0.719308 | 38.17042 | 0.177539 | 1 |
| FHOD3   | 1 | 4544.628542 | 1.393312 | 0.191378 | 10.14387 | 0.517892 | 1 |
| FILIP1  | 2 | 6417.534417 | 2.009941 | 0.484788 | 8.333261 | 0.272019 | 1 |
| FKBP15  | 3 | 8932.698124 | 2.201719 | 0.678725 | 7.142169 | 0.168984 | 1 |
| FKTN    | 1 | 3389.075161 | 1.877125 | 0.257814 | 13.66721 | 0.418879 | 1 |
| FLG     | 4 | 22743.55427 | 1.117545 | 0.397736 | 3.140037 | 0.780903 | 1 |
| FLG2    | 2 | 9571.889038 | 1.330234 | 0.320868 | 5.514796 | 0.6648   | 1 |
| FLNC    | 2 | 7829.000179 | 1.638086 | 0.395113 | 6.791286 | 0.355066 | 1 |
| FLVCR2  | 2 | 2337.162599 | 5.610916 | 1.352828 | 23.27153 | 0.053423 | 1 |
| FMN1    | 1 | 6782.142979 | 0.925182 | 0.127087 | 6.735221 | 1        | 1 |
| FMN2    | 1 | 8070.104146 | 0.773434 | 0.106245 | 5.630384 | 1        | 1 |
| FN1     | 2 | 11207.03836 | 1.128468 | 0.272205 | 4.678235 | 0.698749 | 1 |
| FN3KRP  | 1 | 2878.923726 | 2.214299 | 0.304108 | 16.12297 | 0.369135 | 1 |
| FNDC1   | 1 | 5720.252555 | 1.101169 | 0.151329 | 8.020391 | 0.60162  | 1 |
| FNDC7   | 1 | 4619.922202 | 1.370187 | 0.188203 | 9.975474 | 0.523714 | 1 |
| FOCAD   | 1 | 2261.95185  | 2.825266 | 0.387981 | 20.57349 | 0.303387 | 1 |
| FOLR1   | 1 | 154.032558  | 41.83963 | 5.712168 | 306.4607 | 0.024357 | 1 |
| FOS     | 1 | 1396.910846 | 4.590699 | 0.630253 | 33.43817 | 0.199846 | 1 |
| FOXDL5  | 1 | 1986.321253 | 3.220871 | 0.442282 | 23.45566 | 0.271857 | 1 |
| FOXEL   | 1 | 204.5559139 | 31.49931 | 4.307112 | 230.3647 | 0.032243 | 1 |
| FOXF2   | 1 | 157.7253869 | 40.85944 | 5.579165 | 299.2372 | 0.024977 | 1 |
| FOXJ2   | 1 | 379.680624  | 16.95867 | 2.323929 | 123.7545 | 0.058836 | 1 |
| FOXX1   | 1 | 862.3758858 | 7.452091 | 1.022653 | 54.30354 | 0.128451 | 1 |
| FOXM1   | 2 | 7835.043379 | 1.636782 | 0.394799 | 6.785878 | 0.355414 | 1 |
| FOXSL   | 2 | 1275.354117 | 10.32616 | 2.488506 | 42.84881 | 0.017681 | 1 |
| FPR2    | 1 | 1672.083706 | 3.830993 | 0.526014 | 27.90137 | 0.234292 | 1 |
| FRAS1   | 4 | 13033.14079 | 2.032961 | 0.723491 | 5.712489 | 0.151587 | 1 |
| FREM1   | 1 | 8407.93828  | 0.741326 | 0.101835 | 5.396627 | 1        | 1 |
| FRMD3   | 3 | 8577.754576 | 2.296181 | 0.707839 | 7.448649 | 0.155317 | 1 |
| FRMPD1  | 1 | 6620.725518 | 0.948363 | 0.130271 | 6.904005 | 1        | 1 |
| FRMPD2  | 1 | 4168.192209 | 1.52146  | 0.208976 | 11.07705 | 0.487561 | 1 |
| FRY     | 2 | 391.415538  | 33.76471 | 8.117565 | 140.443  | 0.001826 | 1 |
| FRYL    | 2 | 2623.96774  | 4.991878 | 1.20365  | 20.70274 | 0.06547  | 1 |
| FSCN3   | 1 | 2390.760999 | 2.671666 | 0.366896 | 19.45453 | 0.317664 | 1 |
| FSHR    | 1 | 583.1397865 | 11.0328  | 1.513221 | 80.4394  | 0.088792 | 1 |
| FTO     | 1 | 417.5836717 | 15.41705 | 2.113161 | 112.4786 | 0.064516 | 1 |
| FUT10   | 1 | 5194.565018 | 1.215775 | 0.166997 | 8.851093 | 0.566127 | 1 |
| FUT5    | 1 | 1357.275187 | 4.725507 | 0.648748 | 34.42079 | 0.194712 | 1 |
| FUT7    | 2 | 3575.216276 | 3.649699 | 0.880142 | 15.13426 | 0.110728 | 1 |
| G6PC    | 1 | 360.1310779 | 17.88066 | 2.449935 | 130.5006 | 0.055834 | 1 |
| GAB4    | 2 | 6521.20006  | 1.977153 | 0.476881 | 8.197294 | 0.278124 | 1 |
| GABRE   | 1 | 683.2361149 | 9.4127   | 1.291328 | 68.61071 | 0.103205 | 1 |
| GAD2    | 1 | 2315.455539 | 2.75939  | 0.378939 | 20.09358 | 0.309288 | 1 |
| GALE    | 1 | 510.9138373 | 12.59609 | 1.727232 | 91.85877 | 0.078276 | 1 |
| GALNT8  | 1 | 3563.556781 | 1.78396  | 0.245022 | 12.9887  | 0.43505  | 1 |
| GAMT    | 2 | 1015.120568 | 12.98684 | 3.128856 | 53.90402 | 0.011506 | 1 |
| GANC    | 2 | 6929.36155  | 1.857592 | 0.448049 | 7.7015   | 0.302279 | 1 |
| GBE1    | 1 | 3906.81217  | 1.624967 | 0.22319  | 11.83082 | 0.465482 | 1 |
| GCAT    | 1 | 4488.115691 | 1.411179 | 0.193832 | 10.27398 | 0.513422 | 1 |
| GCDH    | 1 | 693.6769714 | 9.270639 | 1.271866 | 67.57377 | 0.104777 | 1 |

|         |   |             |          |          |          |          |   |
|---------|---|-------------|----------|----------|----------|----------|---|
| GCFC2   | 2 | 5925.698247 | 2.181136 | 0.52607  | 9.043196 | 0.242896 | 1 |
| GCNT1   | 1 | 5238.413401 | 1.205384 | 0.16557  | 8.775428 | 0.569146 | 1 |
| GDF3    | 1 | 8295.917538 | 0.751683 | 0.103257 | 5.472027 | 1        | 1 |
| GDPD5   | 1 | 638.9628069 | 10.06668 | 1.380911 | 73.38485 | 0.096891 | 1 |
| GEMIN8  | 2 | 5176.168168 | 2.504594 | 0.604065 | 10.38463 | 0.198961 | 1 |
| GGN     | 1 | 9607.381056 | 0.645574 | 0.088683 | 4.699509 | 1        | 1 |
| GGT6    | 1 | 8443.232424 | 0.73812  | 0.101395 | 5.373285 | 1        | 1 |
| GHR     | 1 | 1673.655221 | 3.827372 | 0.525517 | 27.87498 | 0.234538 | 1 |
| GHRHR   | 1 | 365.7543348 | 17.60536 | 2.412314 | 128.4861 | 0.056736 | 1 |
| GIGYF2  | 1 | 2191.780422 | 2.91654  | 0.40051  | 21.23844 | 0.295519 | 1 |
| GIMAP5  | 1 | 784.3488293 | 8.195976 | 1.124611 | 59.73091 | 0.117537 | 1 |
| GIMAP8  | 1 | 2500.988039 | 2.552786 | 0.350577 | 18.58854 | 0.329612 | 1 |
| GJB4    | 4 | 24427.72418 | 1.032835 | 0.36759  | 2.902007 | 0.793479 | 1 |
| GLB1L2  | 2 | 8258.769896 | 1.550105 | 0.373895 | 6.426468 | 0.379865 | 1 |
| GLDN    | 1 | 2176.440009 | 2.937278 | 0.403357 | 21.38952 | 0.293708 | 1 |
| GLE1    | 1 | 459.6297815 | 14.00438 | 1.919938 | 102.1505 | 0.070755 | 1 |
| GLI1    | 1 | 2612.400221 | 2.442823 | 0.335481 | 17.78753 | 0.341462 | 1 |
| GLI3    | 1 | 12231.63034 | 0.501567 | 0.068902 | 3.651122 | 1        | 1 |
| GLIS3   | 2 | 3716.067476 | 3.509368 | 0.846313 | 14.55214 | 0.118007 | 1 |
| GLT8D2  | 1 | 3226.551967 | 1.972968 | 0.270974 | 14.36525 | 0.403508 | 1 |
| GLTSCR2 | 3 | 6551.903693 | 3.031231 | 0.934377 | 9.833678 | 0.085798 | 1 |
| GMPR    | 2 | 731.3232844 | 18.04693 | 4.345718 | 74.94544 | 0.006147 | 1 |
| GMPR2   | 2 | 8134.24605  | 1.574641 | 0.379812 | 6.528205 | 0.372691 | 1 |
| GMPS    | 1 | 2252.297218 | 2.837487 | 0.389659 | 20.66252 | 0.302269 | 1 |
| GNAT2   | 1 | 1724.43586  | 3.71391  | 0.509947 | 27.04817 | 0.240641 | 1 |
| GNAT3   | 1 | 4135.017782 | 1.533872 | 0.210681 | 11.16744 | 0.48482  | 1 |
| GNL1    | 1 | 8311.091755 | 0.750264 | 0.103062 | 5.461694 | 1        | 1 |
| GOLGA3  | 1 | 6052.087682 | 1.039878 | 0.14284  | 7.570329 | 0.622586 | 1 |
| GOLGB1  | 1 | 7593.579841 | 0.823578 | 0.113132 | 5.995469 | 1        | 1 |
| GOLT1A  | 1 | 323.9904337 | 19.87808 | 2.722798 | 145.1221 | 0.050405 | 1 |
| GON4L   | 1 | 3376.903046 | 1.883983 | 0.258756 | 13.71716 | 0.417754 | 1 |
| GORASP1 | 1 | 5252.993501 | 1.201967 | 0.165101 | 8.750549 | 0.570194 | 1 |
| GOT2    | 1 | 3736.558593 | 1.700176 | 0.233517 | 12.37853 | 0.450604 | 1 |
| GPAA1   | 1 | 1348.230772 | 4.757379 | 0.65312  | 34.65311 | 0.193552 | 1 |
| GPALPP1 | 3 | 3983.943991 | 5.037356 | 1.552516 | 16.34441 | 0.025434 | 1 |
| GPATCH2 | 2 | 10672.47964 | 1.187627 | 0.286474 | 4.923514 | 0.687136 | 1 |
| GPC1    | 1 | 5624.271888 | 1.120928 | 0.153971 | 8.160472 | 0.595348 | 1 |
| GPC2    | 1 | 383.7951992 | 16.77659 | 2.29904  | 122.4224 | 0.059436 | 1 |
| GPD1    | 1 | 1153.580546 | 5.564446 | 0.763827 | 40.53675 | 0.168155 | 1 |
| GPI     | 2 | 4429.465561 | 2.935682 | 0.708005 | 12.17255 | 0.156476 | 1 |
| GPR113  | 4 | 24670.51272 | 1.021577 | 0.363583 | 2.870373 | 1        | 1 |
| GPR114  | 2 | 1909.654485 | 6.878796 | 1.658308 | 28.53381 | 0.037229 | 1 |
| GPR115  | 1 | 4915.960699 | 1.28613  | 0.176659 | 9.363393 | 0.546029 | 1 |
| GPR116  | 1 | 6332.292061 | 0.992729 | 0.136365 | 7.22703  | 1        | 1 |
| GPR12   | 1 | 71.223549   | 90.51485 | 12.26808 | 667.8257 | 0.011387 | 1 |
| GPR124  | 2 | 7505.204054 | 1.711029 | 0.412704 | 7.093748 | 0.336177 | 1 |
| GPR125  | 1 | 4840.516625 | 1.306575 | 0.179467 | 9.512269 | 0.540473 | 1 |
| GPR126  | 3 | 11038.89783 | 1.766166 | 0.544476 | 5.729074 | 0.256076 | 1 |
| GPR128  | 1 | 884.0105501 | 7.269086 | 0.997566 | 52.96853 | 0.131506 | 1 |
| GPR137B | 2 | 1118.244124 | 11.78435 | 2.839494 | 48.9069  | 0.013814 | 1 |
| GPR15   | 1 | 1035.407651 | 6.202452 | 0.851324 | 45.18893 | 0.152192 | 1 |
| GPR17   | 1 | 2296.681984 | 2.782155 | 0.382064 | 20.25943 | 0.307289 | 1 |
| GPR26   | 1 | 87.65813104 | 73.53987 | 9.992613 | 541.2111 | 0.014057 | 1 |
| GPR35   | 1 | 5747.428244 | 1.096359 | 0.150597 | 7.981579 | 0.603366 | 1 |
| GPR56   | 1 | 8740.345045 | 0.712158 | 0.097828 | 5.184264 | 1        | 1 |
| GPR63   | 1 | 628.570635  | 10.23353 | 1.403765 | 74.60308 | 0.09545  | 1 |
| GPR98   | 5 | 30915.44481 | 1.01928  | 0.399302 | 2.601873 | 1        | 1 |
| GPRASP1 | 1 | 1987.578959 | 3.218816 | 0.442    | 23.44069 | 0.272091 | 1 |
| GPRIN1  | 1 | 1199.997999 | 5.348214 | 0.734169 | 38.96025 | 0.174246 | 1 |
| GPSM2   | 2 | 6925.025975 | 1.858788 | 0.448337 | 7.706459 | 0.302042 | 1 |
| GPT2    | 1 | 424.5280798 | 15.16444 | 2.078615 | 110.6314 | 0.065559 | 1 |
| GPX5    | 2 | 6121.554582 | 2.109667 | 0.508836 | 8.746818 | 0.254485 | 1 |
| GPX7    | 1 | 366.4757662 | 17.57065 | 2.407571 | 128.2321 | 0.056736 | 1 |
| GRAMD1A | 1 | 5773.726135 | 1.091249 | 0.149895 | 7.944369 | 0.605106 | 1 |
| GRAMD1E | 1 | 406.0519287 | 15.85562 | 2.173131 | 115.6859 | 0.062726 | 1 |
| GRB7    | 1 | 2096.256316 | 3.050612 | 0.418913 | 22.2152  | 0.284587 | 1 |
| GREB1   | 1 | 3158.5612   | 2.01599  | 0.276881 | 14.67858 | 0.396938 | 1 |
| GRHL3   | 2 | 6484.217601 | 1.98873  | 0.479673 | 8.245301 | 0.275931 | 1 |
| GRID2IP | 1 | 5776.601778 | 1.090693 | 0.149819 | 7.94032  | 0.605298 | 1 |
| GRIK2   | 1 | 497.7870815 | 12.92892 | 1.772784 | 94.29074 | 0.076364 | 1 |
| GRIN3B  | 1 | 7638.157057 | 0.818622 | 0.112452 | 5.959385 | 1        | 1 |
| GRK7    | 1 | 2333.780951 | 2.737521 | 0.375937 | 19.93427 | 0.311391 | 1 |
| GRM1    | 2 | 5243.733693 | 2.471645 | 0.59612  | 10.24798 | 0.202905 | 1 |

|          |   |             |          |          |          |          |   |
|----------|---|-------------|----------|----------|----------|----------|---|
| GRM2     | 1 | 5041.251846 | 1.253528 | 0.172182 | 9.125999 | 0.555143 | 1 |
| GSE1     | 1 | 4243.527675 | 1.493994 | 0.205205 | 10.87704 | 0.493822 | 1 |
| GSG2     | 1 | 790.1175867 | 8.135948 | 1.116384 | 59.29291 | 0.118381 | 1 |
| GSTA3    | 2 | 6630.898662 | 1.943573 | 0.468783 | 8.058044 | 0.284642 | 1 |
| GSTA5    | 2 | 897.2184032 | 14.70033 | 3.541062 | 61.02684 | 0.009096 | 1 |
| GSTM5    | 1 | 4428.77185  | 1.430432 | 0.196476 | 10.41418 | 0.508751 | 1 |
| GTF3C1   | 3 | 7159.991746 | 2.766906 | 0.852917 | 8.975988 | 0.104944 | 1 |
| GTPBP8   | 1 | 3224.967117 | 1.97395  | 0.271108 | 14.3724  | 0.403315 | 1 |
| GTSF1L   | 2 | 6804.73703  | 1.892577 | 0.456486 | 7.846572 | 0.294945 | 1 |
| GYS2     | 1 | 1187.892344 | 5.402978 | 0.74168  | 39.35952 | 0.172661 | 1 |
| HAAO     | 1 | 1282.968602 | 5.000683 | 0.686497 | 36.42668 | 0.185128 | 1 |
| HABP2    | 2 | 7227.657017 | 1.778755 | 0.429037 | 7.374583 | 0.319917 | 1 |
| HAPLN1   | 2 | 309.4198193 | 42.72624 | 10.2627  | 177.8804 | 0.001152 | 1 |
| HAS1     | 1 | 3128.258191 | 2.035767 | 0.279596 | 14.82263 | 0.39392  | 1 |
| HAUS6    | 1 | 3611.832592 | 1.759773 | 0.2417   | 12.81256 | 0.439408 | 1 |
| HCFC1    | 1 | 756.7500984 | 8.495819 | 1.165701 | 61.9189  | 0.113727 | 1 |
| HCLS1    | 1 | 3425.868057 | 1.856689 | 0.255008 | 13.51838 | 0.422335 | 1 |
| HDAC10   | 1 | 3860.704689 | 1.64468  | 0.225897 | 11.97438 | 0.461495 | 1 |
| HDAC6    | 1 | 6314.31108  | 0.995629 | 0.136763 | 7.248145 | 1        | 1 |
| HEATR1   | 1 | 2365.231992 | 2.700779 | 0.370893 | 19.66661 | 0.31481  | 1 |
| HEATR5B  | 1 | 1618.514751 | 3.958639 | 0.54353  | 28.83157 | 0.227768 | 1 |
| HEATR6   | 1 | 1172.373977 | 5.474835 | 0.751536 | 39.88341 | 0.170544 | 1 |
| HEBP1    | 2 | 6930.775971 | 1.857202 | 0.447955 | 7.699883 | 0.302397 | 1 |
| HECTD4   | 1 | 867.0393108 | 7.411871 | 1.017139 | 54.01013 | 0.129146 | 1 |
| HECW1    | 1 | 2532.223915 | 2.52098  | 0.346211 | 18.35685 | 0.332942 | 1 |
| HELB     | 1 | 9970.272109 | 0.621143 | 0.085327 | 4.521649 | 1        | 1 |
| HELZ     | 1 | 795.7736337 | 8.077939 | 1.108434 | 58.86964 | 0.119224 | 1 |
| HELZ2    | 2 | 11102.22004 | 1.139619 | 0.274895 | 4.724468 | 0.696443 | 1 |
| HENMT1   | 2 | 5165.823806 | 2.509715 | 0.6053   | 10.40587 | 0.198382 | 1 |
| HERC1    | 3 | 18423.67224 | 1.025732 | 0.316233 | 3.327066 | 1        | 1 |
| HEXB     | 2 | 2676.14476  | 4.893525 | 1.179947 | 20.29463 | 0.067743 | 1 |
| HEY1     | 1 | 305.191241  | 21.10411 | 2.890203 | 154.1011 | 0.047528 | 1 |
| HGF      | 1 | 818.5774726 | 7.85219  | 1.077494 | 57.22251 | 0.122451 | 1 |
| HGFAC    | 2 | 6306.906523 | 2.04612  | 0.493512 | 8.483292 | 0.265441 | 1 |
| HGS      | 1 | 703.1157898 | 9.145843 | 1.254768 | 66.66288 | 0.106061 | 1 |
| HHIPL1   | 1 | 1247.232489 | 5.144698 | 0.706253 | 37.47655 | 0.180426 | 1 |
| HIGD1C   | 1 | 858.996607  | 7.481508 | 1.026685 | 54.51814 | 0.128034 | 1 |
| HIP1     | 2 | 1505.89153  | 8.737266 | 2.105939 | 36.24976 | 0.0241   | 1 |
| HIST1H1D | 1 | 3875.048326 | 1.638497 | 0.225048 | 11.92935 | 0.462711 | 1 |
| HK2      | 1 | 886.6481747 | 7.247385 | 0.994591 | 52.81023 | 0.131922 | 1 |
| HLA-A    | 1 | 2954.599463 | 2.156927 | 0.296231 | 15.7051  | 0.376803 | 1 |
| HLA-B    | 2 | 22721.93041 | 0.529917 | 0.127833 | 2.196717 | 0.579326 | 1 |
| HLA-DMA  | 1 | 10933.81461 | 0.564145 | 0.077498 | 4.106694 | 1        | 1 |
| HLA-DQB  | 2 | 2376.969416 | 5.516069 | 1.329973 | 22.87793 | 0.05505  | 1 |
| HLA-G    | 1 | 12198.79252 | 0.502986 | 0.069097 | 3.661454 | 1        | 1 |
| HMCN1    | 1 | 16735.51643 | 0.359684 | 0.049412 | 2.618239 | 0.519883 | 1 |
| HMGXB3   | 1 | 2748.993823 | 2.320168 | 0.318643 | 16.89411 | 0.355806 | 1 |
| HMX2     | 1 | 1315.996009 | 4.874537 | 0.669193 | 35.50713 | 0.189416 | 1 |
| HN1      | 1 | 921.3240634 | 6.97365  | 0.957065 | 50.81349 | 0.13662  | 1 |
| HOXA4    | 1 | 431.9981096 | 14.90177 | 2.042692 | 108.7109 | 0.0666   | 1 |
| HOXC12   | 1 | 1417.633883 | 4.523217 | 0.620995 | 32.9463  | 0.202529 | 1 |
| HOXC4    | 1 | 1020.746959 | 6.291905 | 0.86359  | 45.84126 | 0.150294 | 1 |
| HOXC6    | 1 | 2923.370418 | 2.180243 | 0.299432 | 15.87492 | 0.373586 | 1 |
| HOXC8    | 1 | 133.2389039 | 48.37325 | 6.597723 | 354.6635 | 0.021091 | 1 |
| HPR      | 1 | 2147.720858 | 2.976898 | 0.408795 | 21.67816 | 0.290529 | 1 |
| HS1BP3   | 1 | 3315.058359 | 1.919608 | 0.263647 | 13.97662 | 0.411906 | 1 |
| HS3ST1   | 1 | 175.4172176 | 36.73595 | 5.019217 | 268.8726 | 0.027612 | 1 |
| HS6ST2   | 3 | 3254.758979 | 6.184073 | 1.90576  | 20.06694 | 0.015017 | 1 |
| HSD17B14 | 1 | 11414.88201 | 0.53929  | 0.074084 | 3.925741 | 1        | 1 |
| HSD3B1   | 1 | 1586.43787  | 4.039199 | 0.554584 | 29.41866 | 0.223679 | 1 |
| HSF4     | 1 | 960.5251398 | 6.687994 | 0.917901 | 48.72997 | 0.142115 | 1 |
| HSPA1L   | 1 | 5135.057302 | 1.230161 | 0.168973 | 8.955847 | 0.561879 | 1 |
| HSPD1    | 1 | 4362.592514 | 1.45252  | 0.199509 | 10.57502 | 0.503475 | 1 |
| HTRA1    | 1 | 495.5238288 | 12.98809 | 1.780881 | 94.7231  | 0.07607  | 1 |
| HTRA3    | 2 | 4320.628064 | 3.010958 | 0.726154 | 12.48477 | 0.150494 | 1 |
| HTT      | 1 | 12514.26524 | 0.48966  | 0.067266 | 3.564439 | 0.722313 | 1 |
| HYAL3    | 2 | 2118.109958 | 6.196634 | 1.493959 | 25.70236 | 0.044842 | 1 |
| HYAL4    | 1 | 2070.639404 | 3.08867  | 0.424137 | 22.49248 | 0.281713 | 1 |
| IDH3A    | 1 | 1338.11472  | 4.793539 | 0.658081 | 34.91669 | 0.192262 | 1 |
| IDO2     | 2 | 7832.707351 | 1.637286 | 0.39492  | 6.787968 | 0.355298 | 1 |
| IFFO1    | 1 | 4483.388987 | 1.412694 | 0.19404  | 10.28501 | 0.513027 | 1 |
| IFI16    | 3 | 8857.921243 | 2.22099  | 0.684665 | 7.204693 | 0.166066 | 1 |
| IFI44    | 1 | 727.5224027 | 8.838162 | 1.212611 | 64.41726 | 0.109618 | 1 |

|          |   |             |          |          |          |          |   |
|----------|---|-------------|----------|----------|----------|----------|---|
| IFNA10   | 1 | 2153.911797 | 2.968268 | 0.40761  | 21.61529 | 0.291211 | 1 |
| IFNA14   | 1 | 2696.924006 | 2.365459 | 0.32486  | 17.224   | 0.350398 | 1 |
| IFNAR2   | 1 | 1589.687563 | 4.030889 | 0.553444 | 29.3581  | 0.224175 | 1 |
| IFRD2    | 2 | 3392.322643 | 3.849306 | 0.928259 | 15.9623  | 0.101473 | 1 |
| IFT140   | 1 | 7431.11041  | 0.842145 | 0.115682 | 6.130648 | 1        | 1 |
| IFT46    | 1 | 2224.443556 | 2.873338 | 0.39458  | 20.9237  | 0.299127 | 1 |
| IFT80    | 1 | 529.3662497 | 12.15612 | 1.667012 | 88.64443 | 0.080916 | 1 |
| IFT81    | 2 | 5890.619245 | 2.194438 | 0.529278 | 9.098361 | 0.240829 | 1 |
| IGDCC4   | 1 | 6999.032807 | 0.895717 | 0.12304  | 6.520693 | 1        | 1 |
| IGFBP5   | 1 | 6564.625766 | 0.956687 | 0.131414 | 6.964609 | 1        | 1 |
| IGFLR1   | 1 | 4857.028994 | 1.302046 | 0.178845 | 9.479289 | 0.541664 | 1 |
| IGSF10   | 1 | 12043.35666 | 0.509809 | 0.070034 | 3.711122 | 1        | 1 |
| IGSF21   | 1 | 3554.697575 | 1.78847  | 0.245641 | 13.02155 | 0.434229 | 1 |
| IKBKAP   | 1 | 12186.46717 | 0.503521 | 0.06917  | 3.665346 | 1        | 1 |
| IL10RB   | 1 | 492.8466136 | 13.05879 | 1.790555 | 95.23968 | 0.075628 | 1 |
| IL12B    | 2 | 5304.946811 | 2.442517 | 0.589097 | 10.12718 | 0.206451 | 1 |
| IL17D    | 1 | 117.104085  | 55.04174 | 7.499772 | 403.9581 | 0.018595 | 1 |
| IL17RC   | 1 | 4632.897965 | 1.366277 | 0.187666 | 9.947006 | 0.524716 | 1 |
| IL17RD   | 2 | 4855.786247 | 2.673319 | 0.644748 | 11.08439 | 0.180553 | 1 |
| IL20RA   | 1 | 1550.465064 | 4.133508 | 0.567525 | 30.10597 | 0.219193 | 1 |
| IL25     | 1 | 3397.056494 | 1.872654 | 0.2572   | 13.63465 | 0.419628 | 1 |
| IL411    | 1 | 1602.5814   | 3.998252 | 0.548966 | 29.12025 | 0.225788 | 1 |
| ILVBL    | 1 | 7329.798222 | 0.85414  | 0.11733  | 6.217977 | 1        | 1 |
| INADL    | 3 | 10088.21697 | 1.940244 | 0.598132 | 6.293837 | 0.215688 | 1 |
| INF2     | 1 | 2850.043203 | 2.236997 | 0.307224 | 16.2883  | 0.366186 | 1 |
| INSC     | 3 | 11041.00542 | 1.765813 | 0.544367 | 5.72793  | 0.256163 | 1 |
| INTS2    | 1 | 563.0996899 | 11.42635 | 1.567108 | 83.31372 | 0.085883 | 1 |
| IP6K3    | 2 | 768.6959672 | 17.16696 | 4.134191 | 71.2847  | 0.006775 | 1 |
| IPCEF1   | 1 | 138.2596971 | 46.61568 | 6.359676 | 341.6875 | 0.021869 | 1 |
| IPMK     | 1 | 73.4370508  | 87.78583 | 11.90304 | 647.4273 | 0.011701 | 1 |
| IQCA1    | 2 | 3692.659966 | 3.531947 | 0.851756 | 14.64581 | 0.116811 | 1 |
| IQCB1    | 2 | 5491.405226 | 2.357795 | 0.568668 | 9.77582  | 0.217308 | 1 |
| IQCE     | 1 | 13189.94032 | 0.463263 | 0.06364  | 3.372271 | 0.722983 | 1 |
| IQCF2    | 1 | 3608.453452 | 1.761445 | 0.24193  | 12.82473 | 0.439046 | 1 |
| IQCH     | 1 | 3594.051267 | 1.768606 | 0.242913 | 12.87689 | 0.437777 | 1 |
| IRAK4    | 1 | 3167.698503 | 2.010101 | 0.276072 | 14.63569 | 0.397811 | 1 |
| IRX1     | 1 | 504.9655746 | 12.74476 | 1.74758  | 92.9451  | 0.077394 | 1 |
| ITGA2    | 1 | 2116.271137 | 3.021518 | 0.414919 | 22.00324 | 0.286878 | 1 |
| ITGA7    | 1 | 2661.894581 | 2.396925 | 0.32918  | 17.4532  | 0.346733 | 1 |
| ITGA9    | 1 | 1442.305587 | 4.445405 | 0.610319 | 32.37916 | 0.205585 | 1 |
| ITGAD    | 2 | 4909.447159 | 2.643524 | 0.637564 | 10.96082 | 0.183583 | 1 |
| ITGAE    | 1 | 6661.680039 | 0.942375 | 0.129449 | 6.860407 | 1        | 1 |
| ITGAX    | 1 | 1962.027167 | 3.26107  | 0.447799 | 23.74855 | 0.269051 | 1 |
| ITGB1BP1 | 1 | 157.4766473 | 40.92402 | 5.587929 | 299.7131 | 0.024822 | 1 |
| ITGB2    | 2 | 2426.770071 | 5.401792 | 1.302435 | 22.4037  | 0.057107 | 1 |
| ITIH4    | 1 | 1495.009459 | 4.287787 | 0.588694 | 31.23037 | 0.212291 | 1 |
| ITPKB    | 1 | 536.2453519 | 11.99985 | 1.645621 | 87.50283 | 0.081941 | 1 |
| ITPR2    | 1 | 1634.72402  | 3.919132 | 0.538109 | 28.54367 | 0.229743 | 1 |
| IZUMO4   | 1 | 5788.402853 | 1.088417 | 0.149506 | 7.923749 | 0.606005 | 1 |
| JAK2     | 1 | 456.4025244 | 14.10359 | 1.93351  | 102.8757 | 0.070162 | 1 |
| JMJD1C   | 2 | 3632.192501 | 3.591622 | 0.866142 | 14.89335 | 0.113655 | 1 |
| JMJD4    | 1 | 1999.547759 | 3.199396 | 0.439334 | 23.2992  | 0.273489 | 1 |
| JMJD7-PL | 1 | 4857.214156 | 1.301996 | 0.178838 | 9.478921 | 0.541664 | 1 |
| JMY      | 1 | 1569.705655 | 4.082528 | 0.56053  | 29.73443 | 0.221688 | 1 |
| KALRN    | 1 | 7364.957973 | 0.84994  | 0.116753 | 6.187398 | 1        | 1 |
| KANK1    | 1 | 5555.489618 | 1.135124 | 0.155921 | 8.263835 | 0.590781 | 1 |
| KARS     | 2 | 939.4760588 | 14.03674 | 3.381443 | 58.26808 | 0.009925 | 1 |
| KAT6B    | 2 | 2593.538431 | 5.051064 | 1.217914 | 20.94832 | 0.064171 | 1 |
| KAT8     | 1 | 62.08806997 | 103.8367 | 14.04578 | 767.6376 | 0.00997  | 1 |
| KATNAL1  | 1 | 216.0292771 | 29.82501 | 4.079197 | 218.0653 | 0.033936 | 1 |
| KATNB1   | 2 | 4279.329114 | 3.040524 | 0.733282 | 12.60741 | 0.148181 | 1 |
| KAZALD1  | 2 | 12279.22047 | 1.025338 | 0.247331 | 4.25065  | 1        | 1 |
| KBTBD13  | 2 | 2855.846979 | 4.582292 | 1.104936 | 19.00327 | 0.07581  | 1 |
| KCNA3    | 1 | 420.792982  | 15.29927 | 2.097055 | 111.6173 | 0.064963 | 1 |
| KCNB1    | 1 | 2793.046164 | 2.28317  | 0.313563 | 16.62461 | 0.360348 | 1 |
| KCNC3    | 1 | 397.2527677 | 16.20739 | 2.221227 | 118.2587 | 0.061382 | 1 |
| KCNG4    | 2 | 4154.997675 | 3.133082 | 0.755597 | 12.99132 | 0.141398 | 1 |
| KCNH6    | 3 | 5755.805297 | 3.461702 | 1.067033 | 11.23056 | 0.063347 | 1 |
| KCNH7    | 1 | 2280.728569 | 2.801796 | 0.38476  | 20.40251 | 0.305508 | 1 |
| KCNJ12   | 1 | 1543.505812 | 4.152261 | 0.570098 | 30.24264 | 0.218443 | 1 |
| KCNK16   | 1 | 1925.476365 | 3.32346  | 0.456362 | 24.20313 | 0.264703 | 1 |
| KCNK7    | 1 | 113.0838108 | 56.99946 | 7.764251 | 418.4484 | 0.017971 | 1 |
| KCNQ2    | 1 | 283.8991672 | 22.68882 | 3.10649  | 165.7119 | 0.044338 | 1 |

|           |   |             |          |          |          |          |   |
|-----------|---|-------------|----------|----------|----------|----------|---|
| KCTD19    | 2 | 1048.438615 | 12.57246 | 3.029149 | 52.18188 | 0.012225 | 1 |
| KDEL2     | 2 | 4450.279589 | 2.921705 | 0.704635 | 12.11458 | 0.157645 | 1 |
| KDM1A     | 2 | 1158.100734 | 11.37697 | 2.741449 | 47.21426 | 0.014759 | 1 |
| KDM1B     | 3 | 3310.481899 | 6.078617 | 1.873277 | 19.72457 | 0.015697 | 1 |
| KDM2B     | 1 | 524.8824206 | 12.26019 | 1.681257 | 89.40468 | 0.08033  | 1 |
| KDM3A     | 1 | 1613.797478 | 3.970285 | 0.545128 | 28.91644 | 0.22715  | 1 |
| KDM3B     | 2 | 6651.615486 | 1.937356 | 0.467284 | 8.032262 | 0.285886 | 1 |
| KDM4E     | 1 | 4476.140055 | 1.415023 | 0.19436  | 10.30197 | 0.512475 | 1 |
| KDM5B     | 1 | 6756.681871 | 0.928765 | 0.127579 | 6.761308 | 1        | 1 |
| KDM6B     | 1 | 4202.122951 | 1.508968 | 0.207261 | 10.98608 | 0.490371 | 1 |
| KHK       | 1 | 518.6947589 | 12.40675 | 1.701317 | 90.47543 | 0.07945  | 1 |
| KIAA0226  | 1 | 4621.490255 | 1.369713 | 0.188138 | 9.972026 | 0.523791 | 1 |
| KIAA0226L | 1 | 1497.379985 | 4.280958 | 0.587757 | 31.1806  | 0.212543 | 1 |
| KIAA0319L | 2 | 1259.885074 | 10.45359 | 2.519183 | 43.37816 | 0.017294 | 1 |
| KIAA0355  | 1 | 916.1413395 | 7.013246 | 0.962493 | 51.10231 | 0.13593  | 1 |
| KIAA0430  | 1 | 5607.331238 | 1.124392 | 0.154447 | 8.185694 | 0.594228 | 1 |
| KIAA0556  | 1 | 12918.4391  | 0.473538 | 0.065052 | 3.447072 | 0.722519 | 1 |
| KIAA1147  | 2 | 980.0276738 | 13.45375 | 3.241194 | 55.8447  | 0.010765 | 1 |
| KIAA1217  | 2 | 8238.196283 | 1.554107 | 0.37486  | 6.443065 | 0.378662 | 1 |
| KIAA1324  | 1 | 8237.965817 | 0.757151 | 0.104008 | 5.511839 | 1        | 1 |
| KIAA1324L | 1 | 2669.404725 | 2.390109 | 0.328245 | 17.40356 | 0.347467 | 1 |
| KIAA1407  | 2 | 10326.06725 | 1.229234 | 0.296509 | 5.096027 | 0.679846 | 1 |
| KIAA1462  | 1 | 1494.937383 | 4.287995 | 0.588722 | 31.23188 | 0.212291 | 1 |
| KIAA1524  | 2 | 4606.913315 | 2.820579 | 0.680253 | 11.69515 | 0.166436 | 1 |
| KIAA1549L | 1 | 2924.850017 | 2.179127 | 0.299279 | 15.86679 | 0.373787 | 1 |
| KIAA1551  | 1 | 1475.992637 | 4.343361 | 0.596319 | 31.63541 | 0.209894 | 1 |
| KIAA1614  | 1 | 11765.32054 | 0.522463 | 0.071772 | 3.803241 | 1        | 1 |
| KIAA1683  | 1 | 2440.401176 | 2.6168   | 0.359365 | 19.05485 | 0.323012 | 1 |
| KIAA2013  | 1 | 2110.63312  | 3.029658 | 0.416037 | 22.06254 | 0.286306 | 1 |
| KIDINS22C | 1 | 1617.284239 | 3.96167  | 0.543946 | 28.85366 | 0.227521 | 1 |
| KIF13B    | 2 | 7183.494264 | 1.790014 | 0.431752 | 7.421271 | 0.317267 | 1 |
| KIF15     | 1 | 2172.984894 | 2.941989 | 0.404003 | 21.42384 | 0.293368 | 1 |
| KIF16B    | 1 | 3212.346721 | 1.981806 | 0.272187 | 14.42962 | 0.402064 | 1 |
| KIF17     | 1 | 6634.648764 | 0.946319 | 0.12999  | 6.889123 | 1        | 1 |
| KIF18A    | 1 | 3535.418714 | 1.798362 | 0.246999 | 13.09359 | 0.4324   | 1 |
| KIF1B     | 1 | 11194.45541 | 0.550413 | 0.075612 | 4.006724 | 1        | 1 |
| KIF21B    | 1 | 2112.376194 | 3.027137 | 0.415691 | 22.04417 | 0.28642  | 1 |
| KIF27     | 1 | 3129.187041 | 2.035155 | 0.279512 | 14.81817 | 0.394017 | 1 |
| KIF7      | 1 | 7271.838645 | 0.861152 | 0.118293 | 6.269031 | 1        | 1 |
| KIR2DL3   | 4 | 6812.472353 | 3.990777 | 1.420054 | 11.21528 | 0.022681 | 1 |
| KIRREL2   | 1 | 1618.92857  | 3.95762  | 0.54339  | 28.82415 | 0.227768 | 1 |
| KITLG     | 1 | 2598.856412 | 2.455687 | 0.337247 | 17.88124 | 0.340085 | 1 |
| KLC4      | 2 | 7213.739658 | 1.782288 | 0.429889 | 7.389234 | 0.319092 | 1 |
| KLHDC10   | 2 | 8937.768912 | 1.428346 | 0.34453  | 5.921602 | 0.653364 | 1 |
| KLHDC7A   | 1 | 5275.490905 | 1.196732 | 0.164382 | 8.712429 | 0.571728 | 1 |
| KLHL1     | 1 | 911.1839861 | 7.051542 | 0.967743 | 51.38164 | 0.13524  | 1 |
| KLHL13    | 1 | 312.6668439 | 20.59892 | 2.82123  | 150.4008 | 0.04874  | 1 |
| KLHL28    | 1 | 718.9666345 | 8.943642 | 1.227064 | 65.18709 | 0.108339 | 1 |
| KLHL33    | 1 | 1437.776202 | 4.459491 | 0.612252 | 32.48182 | 0.205076 | 1 |
| KLHL4     | 1 | 379.1033351 | 16.98454 | 2.327464 | 123.9437 | 0.058687 | 1 |
| KLK14     | 1 | 3467.798959 | 1.833929 | 0.251883 | 13.35262 | 0.426234 | 1 |
| KLK3      | 2 | 588.0133087 | 22.45814 | 5.40551  | 93.30627 | 0.004038 | 1 |
| KLRG2     | 1 | 745.1553481 | 8.628414 | 1.183871 | 62.88653 | 0.112029 | 1 |
| KMT2A     | 1 | 9460.256397 | 0.656012 | 0.090117 | 4.775505 | 1        | 1 |
| KRI1      | 1 | 846.3001483 | 7.594132 | 1.042123 | 55.33978 | 0.126223 | 1 |
| KRT12     | 2 | 2228.99973  | 5.885741 | 1.41905  | 24.41206 | 0.049122 | 1 |
| KRT16     | 3 | 5752.148638 | 3.463954 | 1.067727 | 11.23787 | 0.063242 | 1 |
| KRT18     | 1 | 128.8097098 | 50.03747 | 6.823012 | 366.9566 | 0.020468 | 1 |
| KRT19     | 1 | 2940.468741 | 2.167416 | 0.297671 | 15.78149 | 0.375297 | 1 |
| KRT2      | 1 | 786.6658217 | 8.17176  | 1.121292 | 59.55421 | 0.117959 | 1 |
| KRT20     | 1 | 1514.400776 | 4.232555 | 0.581115 | 30.82783 | 0.214682 | 1 |
| KRT33B    | 1 | 18268.72629 | 0.327346 | 0.04497  | 2.382826 | 0.364595 | 1 |
| KRT37     | 1 | 1127.506646 | 5.693718 | 0.781557 | 41.4793  | 0.164692 | 1 |
| KRT6A     | 1 | 10001.85827 | 0.619101 | 0.085046 | 4.506778 | 1        | 1 |
| KRT6B     | 1 | 4929.863926 | 1.282431 | 0.176151 | 9.336455 | 0.547058 | 1 |
| KRT72     | 2 | 6125.990393 | 2.108102 | 0.508459 | 8.740325 | 0.254722 | 1 |
| KRT75     | 1 | 14242.06588 | 0.427145 | 0.058679 | 3.10934  | 0.727009 | 1 |
| KRT76     | 3 | 2919.982465 | 6.902374 | 2.126998 | 22.39907 | 0.011246 | 1 |
| KRT77     | 4 | 18902.81805 | 1.367187 | 0.486576 | 3.841536 | 0.540834 | 1 |
| KRT83     | 1 | 1791.609073 | 3.573702 | 0.490706 | 26.0265  | 0.248866 | 1 |
| KRTAP27-  | 1 | 5744.306115 | 1.096969 | 0.150681 | 7.986019 | 0.603173 | 1 |
| KRTCAP3   | 1 | 265.9263828 | 24.22399 | 3.315919 | 176.965  | 0.041595 | 1 |
| L2HGDH    | 1 | 693.3104864 | 9.275553 | 1.272539 | 67.60963 | 0.104634 | 1 |

|         |   |             |          |          |          |          |   |
|---------|---|-------------|----------|----------|----------|----------|---|
| L3MBTL2 | 1 | 907.8300959 | 7.077687 | 0.971328 | 51.57236 | 0.134826 | 1 |
| LAD1    | 1 | 1785.564885 | 3.585886 | 0.492378 | 26.11528 | 0.248144 | 1 |
| LAMA1   | 5 | 11880.12681 | 2.881353 | 1.128647 | 7.355882 | 0.039177 | 1 |
| LAMA4   | 2 | 8618.151285 | 1.48327  | 0.357777 | 6.14934  | 0.400287 | 1 |
| LAMA5   | 8 | 27526.14603 | 2.034156 | 0.937275 | 4.4147   | 0.074935 | 1 |
| LAMB1   | 2 | 14314.41468 | 0.872075 | 0.210365 | 3.615223 | 1        | 1 |
| LAMB3   | 1 | 3051.121928 | 2.087882 | 0.286751 | 15.2022  | 0.386359 | 1 |
| LAMB4   | 3 | 21720.44682 | 0.857738 | 0.264444 | 2.782122 | 1        | 1 |
| LAMC3   | 1 | 5931.325107 | 1.061572 | 0.14582  | 7.728288 | 0.615073 | 1 |
| LAMP1   | 1 | 255.5812306 | 25.20554 | 3.449772 | 184.1626 | 0.040068 | 1 |
| LAMP2   | 1 | 787.8703266 | 8.159228 | 1.119574 | 59.46277 | 0.1181   | 1 |
| LARGE   | 1 | 1651.781784 | 3.878395 | 0.532519 | 28.2468  | 0.231837 | 1 |
| LARP1B  | 2 | 871.7948033 | 15.13056 | 3.644537 | 62.81566 | 0.008619 | 1 |
| LARS    | 1 | 2279.14807  | 2.803756 | 0.385029 | 20.41679 | 0.305285 | 1 |
| LAT2    | 1 | 3129.825775 | 2.034734 | 0.279454 | 14.81511 | 0.394115 | 1 |
| LATS1   | 1 | 1925.468436 | 3.323474 | 0.456364 | 24.20323 | 0.264703 | 1 |
| LCAT    | 1 | 198.5673867 | 32.45006 | 4.436483 | 237.3516 | 0.031319 | 1 |
| LCP2    | 1 | 3457.894448 | 1.839256 | 0.252614 | 13.39141 | 0.425308 | 1 |
| LECT1   | 1 | 2182.858891 | 2.928565 | 0.402161 | 21.32604 | 0.294501 | 1 |
| LDB2    | 1 | 123.2771197 | 52.28427 | 7.126986 | 383.5625 | 0.019532 | 1 |
| LECT2   | 2 | 3716.880278 | 3.508589 | 0.846125 | 14.54891 | 0.118059 | 1 |
| LEFTY1  | 1 | 3622.448035 | 1.754541 | 0.240982 | 12.77445 | 0.440312 | 1 |
| LEFTY2  | 2 | 10710.00178 | 1.183282 | 0.285426 | 4.905498 | 0.687949 | 1 |
| LEMD2   | 1 | 924.8124764 | 6.947249 | 0.953445 | 50.62091 | 0.137171 | 1 |
| LEMD3   | 1 | 709.2543872 | 9.066464 | 1.243892 | 66.08351 | 0.106916 | 1 |
| LENG8   | 2 | 6929.424569 | 1.857575 | 0.448045 | 7.701428 | 0.302279 | 1 |
| LEPRE1  | 1 | 13339.03326 | 0.457798 | 0.06289  | 3.332489 | 0.723343 | 1 |
| LGALS13 | 1 | 1496.087134 | 4.28468  | 0.588267 | 31.20772 | 0.212418 | 1 |
| LGI4    | 1 | 832.4035683 | 7.721341 | 1.059559 | 56.26784 | 0.124269 | 1 |
| LGR4    | 1 | 11560.91667 | 0.532153 | 0.073103 | 3.873791 | 1        | 1 |
| LGR5    | 1 | 4746.470628 | 1.332972 | 0.183092 | 9.704481 | 0.533341 | 1 |
| LIFR    | 1 | 987.8099308 | 6.502554 | 0.892474 | 47.3775  | 0.145805 | 1 |
| LILRA1  | 1 | 12606.26823 | 0.485899 | 0.06675  | 3.537061 | 0.722308 | 1 |
| LILRB2  | 1 | 1090.055177 | 5.89022  | 0.808506 | 42.91211 | 0.159606 | 1 |
| LIMD1   | 1 | 375.8687847 | 17.13092 | 2.347472 | 125.0146 | 0.058237 | 1 |
| LIMK2   | 2 | 5384.239536 | 2.405772 | 0.580237 | 9.974786 | 0.211055 | 1 |
| LIMS1   | 1 | 4773.16627  | 1.325373 | 0.182049 | 9.64915  | 0.535379 | 1 |
| LINGO4  | 1 | 2228.132393 | 2.868539 | 0.393921 | 20.88873 | 0.299576 | 1 |
| LIPF    | 2 | 767.5678165 | 17.19227 | 4.140275 | 71.38998 | 0.006758 | 1 |
| LIPH    | 1 | 980.7770966 | 6.549365 | 0.898893 | 47.7189  | 0.14485  | 1 |
| LIPI    | 1 | 3451.396865 | 1.842766 | 0.253096 | 13.41698 | 0.424659 | 1 |
| LMCD1   | 1 | 1677.492379 | 3.818558 | 0.524308 | 27.81075 | 0.234905 | 1 |
| LMNA    | 1 | 767.2256537 | 8.379468 | 1.149757 | 61.06985 | 0.11514  | 1 |
| LMOD3   | 3 | 13074.37989 | 1.478577 | 0.455828 | 4.796088 | 0.463522 | 1 |
| LOXHD1  | 3 | 15751.09721 | 1.213531 | 0.374125 | 3.93627  | 0.738001 | 1 |
| LPA     | 2 | 10266.63081 | 1.236655 | 0.298299 | 5.126796 | 0.678624 | 1 |
| LPIN1   | 1 | 5558.397807 | 1.134516 | 0.155838 | 8.259413 | 0.590981 | 1 |
| LPIN3   | 4 | 8971.074791 | 3.003789 | 1.06892  | 8.440994 | 0.053493 | 1 |
| LRBA    | 2 | 9949.994663 | 1.277684 | 0.308194 | 5.296911 | 0.672178 | 1 |
| LRCH3   | 1 | 1637.454334 | 3.912555 | 0.537206 | 28.49573 | 0.22999  | 1 |
| LRGUK   | 1 | 17039.22455 | 0.352816 | 0.048469 | 2.568242 | 0.521807 | 1 |
| LRIT1   | 1 | 1727.505897 | 3.707264 | 0.509035 | 26.99974 | 0.241127 | 1 |
| LRP1B   | 3 | 8205.432813 | 2.404049 | 0.741085 | 7.798633 | 0.141375 | 1 |
| LRP2    | 2 | 19935.29048 | 0.611348 | 0.147475 | 2.534303 | 0.76825  | 1 |
| LRP4    | 1 | 7963.444426 | 0.784136 | 0.107715 | 5.708304 | 1        | 1 |
| LRP5L   | 1 | 9744.526943 | 0.636127 | 0.087385 | 4.630733 | 1        | 1 |
| LRRC16B | 4 | 24609.49174 | 1.024386 | 0.364583 | 2.878265 | 1        | 1 |
| LRRC25  | 1 | 2664.851717 | 2.394237 | 0.328811 | 17.43362 | 0.347048 | 1 |
| LRRC39  | 1 | 487.511883  | 13.20197 | 1.810148 | 96.28597 | 0.074891 | 1 |
| LRRC43  | 1 | 1094.162046 | 5.868016 | 0.805461 | 42.75019 | 0.160143 | 1 |
| LRRC48  | 1 | 5059.889511 | 1.248817 | 0.171535 | 9.09169  | 0.556513 | 1 |
| LRRC49  | 1 | 461.6711267 | 13.94234 | 1.911451 | 101.6971 | 0.071051 | 1 |
| LRRC52  | 1 | 221.0619937 | 29.14543 | 3.986655 | 213.0749 | 0.034705 | 1 |
| LRRC56  | 4 | 13471.49014 | 1.963195 | 0.698666 | 5.516425 | 0.164855 | 1 |
| LRRCC1  | 2 | 12704.81896 | 0.989228 | 0.238622 | 4.100933 | 1        | 1 |
| LRRFIP1 | 1 | 1686.225829 | 3.798648 | 0.521575 | 27.66566 | 0.236007 | 1 |
| LRRK1   | 1 | 5251.704009 | 1.202268 | 0.165142 | 8.752744 | 0.570125 | 1 |
| LRRK2   | 1 | 3085.310073 | 2.064462 | 0.283536 | 15.03162 | 0.389709 | 1 |
| LRRN2   | 2 | 1762.722356 | 7.456567 | 1.797488 | 30.93227 | 0.032188 | 1 |
| LRTM2   | 1 | 11313.78929 | 0.544337 | 0.074777 | 3.96249  | 1        | 1 |
| LRWD1   | 1 | 1949.445888 | 3.282281 | 0.45071  | 23.9031  | 0.267526 | 1 |
| LSR     | 1 | 5281.262889 | 1.195396 | 0.164199 | 8.702701 | 0.572145 | 1 |
| LSS     | 1 | 16242.70772 | 0.371375 | 0.051018 | 2.703345 | 0.517546 | 1 |



|          |   |             |          |          |          |          |   |
|----------|---|-------------|----------|----------|----------|----------|---|
| LTBP2    | 1 | 6455.964641 | 0.973221 | 0.133685 | 7.08499  | 1        | 1 |
| LTBP3    | 1 | 1005.659045 | 6.386687 | 0.876587 | 46.53248 | 0.148257 | 1 |
| LTF      | 1 | 3791.782789 | 1.675041 | 0.230066 | 12.19548 | 0.455461 | 1 |
| LXN      | 1 | 1718.218396 | 3.727441 | 0.511804 | 27.14677 | 0.239911 | 1 |
| LY75-CD3 | 1 | 11875.31763 | 0.517386 | 0.071075 | 3.766281 | 1        | 1 |
| LYAR     | 1 | 502.7331301 | 12.80147 | 1.755341 | 93.35946 | 0.0771   | 1 |
| LYST     | 1 | 3425.477663 | 1.856904 | 0.255037 | 13.51995 | 0.422242 | 1 |
| M1AP     | 1 | 1040.030827 | 6.174767 | 0.847527 | 44.98704 | 0.152868 | 1 |
| MACF1    | 1 | 14878.34464 | 0.407782 | 0.056019 | 2.968377 | 0.730971 | 1 |
| MACROD1  | 1 | 401.4143852 | 16.03909 | 2.198218 | 117.0278 | 0.061979 | 1 |
| MAGEA6   | 1 | 231.1249321 | 27.87535 | 3.813653 | 203.7509 | 0.03624  | 1 |
| MAGEB6   | 1 | 2208.112434 | 2.894779 | 0.397523 | 21.0799  | 0.297325 | 1 |
| MAGEC1   | 1 | 4244.153108 | 1.493771 | 0.205174 | 10.87541 | 0.493822 | 1 |
| MAGED2   | 1 | 127.6036255 | 50.51066 | 6.887047 | 370.4529 | 0.020312 | 1 |
| MAGI3    | 2 | 8046.057675 | 1.592476 | 0.384114 | 6.602161 | 0.367623 | 1 |
| MAML1    | 3 | 5757.679707 | 3.460548 | 1.066677 | 11.22682 | 0.063399 | 1 |
| MAN2B1   | 2 | 4072.834211 | 3.197349 | 0.771091 | 13.25789 | 0.136953 | 1 |
| MANBA    | 3 | 5815.061857 | 3.4256   | 1.055908 | 11.11341 | 0.064902 | 1 |
| MANEAL   | 1 | 1068.396947 | 6.010145 | 0.824952 | 43.78658 | 0.156648 | 1 |
| MAP1A    | 2 | 12315.36573 | 1.022175 | 0.246568 | 4.237532 | 1        | 1 |
| MAP2     | 2 | 10188.73231 | 1.246513 | 0.300676 | 5.167667 | 0.677018 | 1 |
| MAP3K15  | 1 | 2812.166178 | 2.267472 | 0.311408 | 16.51027 | 0.3623   | 1 |
| MAP3K6   | 1 | 2139.059127 | 2.989056 | 0.410464 | 21.76674 | 0.289504 | 1 |
| MAP4K5   | 1 | 2739.474081 | 2.32832  | 0.319762 | 16.95348 | 0.354769 | 1 |
| MAPK12   | 1 | 1701.313924 | 3.764733 | 0.516921 | 27.41852 | 0.237839 | 1 |
| MAPK4    | 1 | 623.1916436 | 10.32208 | 1.415893 | 75.24962 | 0.094585 | 1 |
| MAPKBP1  | 1 | 2060.763641 | 3.103595 | 0.426185 | 22.60121 | 0.28056  | 1 |
| MARCH7   | 3 | 9615.100723 | 2.039705 | 0.628789 | 6.616523 | 0.196191 | 1 |
| MASP2    | 3 | 9721.761231 | 2.016437 | 0.621617 | 6.541033 | 0.200561 | 1 |
| MAST4    | 2 | 10462.34694 | 1.212537 | 0.292482 | 5.026797 | 0.682687 | 1 |
| MASTL    | 1 | 684.3056042 | 9.397949 | 1.289307 | 68.50304 | 0.103348 | 1 |
| MATN3    | 1 | 9925.028846 | 0.624092 | 0.085732 | 4.543114 | 1        | 1 |
| MBLAC1   | 2 | 10706.32049 | 1.183706 | 0.285528 | 4.90726  | 0.687863 | 1 |
| MBOAT1   | 2 | 3342.864471 | 3.907036 | 0.942175 | 16.20179 | 0.099035 | 1 |
| MC1R     | 3 | 19391.56324 | 0.970488 | 0.299202 | 3.147862 | 1        | 1 |
| MC2R     | 1 | 2408.118785 | 2.652223 | 0.364228 | 19.3129  | 0.319524 | 1 |
| MCC      | 1 | 4611.895141 | 1.372616 | 0.188536 | 9.993165 | 0.523096 | 1 |
| MCEE     | 1 | 6278.71785  | 1.001418 | 0.137558 | 7.290298 | 1        | 1 |
| MCF2L    | 1 | 6375.128791 | 0.985886 | 0.135425 | 7.177208 | 1        | 1 |
| MCF2L2   | 1 | 1918.15422  | 3.336245 | 0.458117 | 24.29628 | 0.263878 | 1 |
| MCM2     | 2 | 5338.600891 | 2.426788 | 0.585304 | 10.06195 | 0.208431 | 1 |
| MCM4     | 1 | 2272.262122 | 2.812331 | 0.386206 | 20.47925 | 0.304504 | 1 |
| MCMBP    | 1 | 177.6999261 | 36.26371 | 4.955046 | 265.3975 | 0.028076 | 1 |
| MDC1     | 2 | 11217.22935 | 1.127395 | 0.271947 | 4.673786 | 0.698969 | 1 |
| MEGF10   | 1 | 1448.570531 | 4.426069 | 0.607666 | 32.23822 | 0.206474 | 1 |
| MEGF6    | 1 | 15270.81076 | 0.396643 | 0.054489 | 2.887287 | 0.516055 | 1 |
| MEGF8    | 2 | 8211.445557 | 1.559342 | 0.376123 | 6.464769 | 0.377114 | 1 |
| MEP1A    | 1 | 1898.809799 | 3.370494 | 0.462817 | 24.54583 | 0.261633 | 1 |
| MEP1B    | 1 | 3896.517526 | 1.629328 | 0.223789 | 11.86258 | 0.464617 | 1 |
| METTL11B | 1 | 10433.74376 | 0.592413 | 0.081381 | 4.312485 | 1        | 1 |
| METTL14  | 1 | 162.9943916 | 39.53778 | 5.399766 | 289.5007 | 0.025753 | 1 |
| METTL21B | 1 | 1957.94889  | 3.267916 | 0.448739 | 23.79843 | 0.268582 | 1 |
| METTL21C | 2 | 1062.881972 | 12.4009  | 2.987867 | 51.46892 | 0.012558 | 1 |
| METTL22  | 1 | 643.8134404 | 9.990639 | 1.370496 | 72.82971 | 0.097611 | 1 |
| MFAP3    | 1 | 227.4074943 | 28.33145 | 3.875787 | 207.0989 | 0.035626 | 1 |
| MFRP     | 1 | 1551.480894 | 4.130785 | 0.567151 | 30.08612 | 0.219318 | 1 |
| MGA      | 3 | 16777.39386 | 1.134338 | 0.349713 | 3.679372 | 0.748158 | 1 |
| MGAM     | 3 | 6957.658705 | 2.849728 | 0.878441 | 9.244726 | 0.098403 | 1 |
| MICA     | 2 | 7828.580352 | 1.638177 | 0.395135 | 6.791662 | 0.355066 | 1 |
| MICAL1   | 2 | 10681.74307 | 1.186551 | 0.286214 | 4.919055 | 0.68735  | 1 |
| MICALCL  | 1 | 3417.314495 | 1.861401 | 0.255655 | 13.5527  | 0.421496 | 1 |
| MICALL2  | 1 | 4615.244019 | 1.371602 | 0.188397 | 9.985777 | 0.523328 | 1 |
| MID1IP1  | 1 | 729.4674778 | 8.814527 | 1.209373 | 64.24477 | 0.10976  | 1 |
| MINA     | 1 | 5076.160721 | 1.244732 | 0.170974 | 9.061943 | 0.557663 | 1 |
| MIPEP    | 2 | 1028.662166 | 12.81518 | 3.087553 | 53.19061 | 0.011809 | 1 |
| MIS18BP1 | 2 | 3524.17853  | 3.703316 | 0.893067 | 15.35669 | 0.108126 | 1 |
| MKI67    | 3 | 26015.50966 | 0.702742 | 0.216661 | 2.279357 | 0.794627 | 1 |
| MLH3     | 1 | 3992.857518 | 1.589397 | 0.218305 | 11.57179 | 0.472857 | 1 |
| MLK4     | 1 | 2543.265757 | 2.509924 | 0.344693 | 18.27631 | 0.33412  | 1 |
| MLLT4    | 2 | 9323.867442 | 1.367019 | 0.32974  | 5.667319 | 0.660173 | 1 |
| MLTK     | 1 | 1617.015508 | 3.962333 | 0.544037 | 28.85849 | 0.227521 | 1 |
| MLXIP    | 1 | 6638.218184 | 0.945797 | 0.129919 | 6.885317 | 1        | 1 |
| MMEL1    | 1 | 2860.852888 | 2.228447 | 0.30605  | 16.22602 | 0.367306 | 1 |

|         |   |             |          |          |          |          |             |
|---------|---|-------------|----------|----------|----------|----------|-------------|
| MMP10   | 1 | 1284.076746 | 4.996345 | 0.685902 | 36.39506 | 0.185258 | 1           |
| MMP17   | 1 | 2587.67522  | 2.466409 | 0.338719 | 17.95934 | 0.338917 | 1           |
| MMP19   | 1 | 1132.858619 | 5.666698 | 0.777851 | 41.28229 | 0.165359 | 1           |
| MMP21   | 3 | 370.9261438 | 54.89366 | 16.851   | 178.8211 | 3.09E-05 | 0.072273809 |
| MMP3    | 1 | 858.7948468 | 7.483272 | 1.026927 | 54.53101 | 0.128034 | 1           |
| MMRN1   | 2 | 2791.765866 | 4.68868  | 1.130577 | 19.44468 | 0.072907 | 1           |
| MNS1    | 3 | 5130.513886 | 3.893485 | 1.200084 | 12.63181 | 0.047991 | 1           |
| MON1B   | 1 | 3969.193341 | 1.599025 | 0.219627 | 11.64191 | 0.470809 | 1           |
| MON2    | 1 | 1573.830513 | 4.07176  | 0.559052 | 29.65596 | 0.222186 | 1           |
| MOSPD2  | 2 | 6590.402044 | 1.955839 | 0.471741 | 8.10891  | 0.282213 | 1           |
| MPDZ    | 4 | 17258.2654  | 1.508055 | 0.536706 | 4.237389 | 0.351904 | 1           |
| MPHOSPF | 1 | 9038.026339 | 0.687857 | 0.094491 | 5.007346 | 1        | 1           |
| MPP2    | 1 | 792.5824562 | 8.110567 | 1.112906 | 59.1077  | 0.118803 | 1           |
| MRGPRX4 | 1 | 2581.335463 | 2.472529 | 0.339559 | 18.00392 | 0.338173 | 1           |
| MR11    | 1 | 1612.643665 | 3.973144 | 0.54552  | 28.93728 | 0.227026 | 1           |
| MROH2B  | 2 | 7939.253214 | 1.614607 | 0.389451 | 6.693928 | 0.361442 | 1           |
| MRP63   | 1 | 2696.455177 | 2.365875 | 0.324917 | 17.22703 | 0.350293 | 1           |
| MRPL13  | 1 | 1100.17852  | 5.835785 | 0.801041 | 42.51518 | 0.160948 | 1           |
| MRPL22  | 1 | 9164.700591 | 0.677995 | 0.093136 | 4.935548 | 1        | 1           |
| MRPS15  | 1 | 465.3444999 | 13.83208 | 1.896366 | 100.8911 | 0.071495 | 1           |
| MRPS27  | 1 | 3967.358874 | 1.599777 | 0.219731 | 11.64738 | 0.470638 | 1           |
| MRPS34  | 4 | 9432.278681 | 2.851482 | 1.014731 | 8.012912 | 0.062072 | 1           |
| MRPS9   | 2 | 1657.568682 | 7.932939 | 1.91223  | 32.91002 | 0.028768 | 1           |
| MRV11   | 2 | 11459.335   | 1.102464 | 0.265934 | 4.570419 | 0.704326 | 1           |
| MS4A13  | 1 | 3625.9533   | 1.75282  | 0.240746 | 12.76192 | 0.440673 | 1           |
| MSH4    | 1 | 2595.967405 | 2.458448 | 0.337626 | 17.90135 | 0.339766 | 1           |
| MSH5    | 2 | 5919.609677 | 2.183433 | 0.526624 | 9.052724 | 0.242541 | 1           |
| MST1R   | 1 | 3624.880094 | 1.753346 | 0.240818 | 12.76575 | 0.440582 | 1           |
| MT1B    | 1 | 1198.0477   | 5.356962 | 0.735369 | 39.02403 | 0.173982 | 1           |
| MTMR11  | 1 | 13909.05941 | 0.437986 | 0.060168 | 3.188257 | 0.725373 | 1           |
| MTMR8   | 1 | 655.5124458 | 9.811877 | 1.34601  | 71.52466 | 0.099336 | 1           |
| MTUS1   | 2 | 16440.96526 | 0.752469 | 0.181515 | 3.119354 | 1        | 1           |
| MTUS2   | 1 | 4570.072549 | 1.385412 | 0.190294 | 10.08634 | 0.519841 | 1           |
| MUC16   | 7 | 18549.00805 | 2.663916 | 1.178279 | 6.022724 | 0.025635 | 1           |
| MUC5B   | 1 | 3907.969962 | 1.624478 | 0.223123 | 11.82726 | 0.465568 | 1           |
| MUC6    | 2 | 15810.79683 | 0.784558 | 0.189255 | 3.252388 | 1        | 1           |
| MUC7    | 2 | 3672.642238 | 3.551485 | 0.856466 | 14.72685 | 0.115774 | 1           |
| MUM1    | 2 | 3414.860975 | 3.823553 | 0.922051 | 15.85547 | 0.102624 | 1           |
| MUS81   | 1 | 9363.774704 | 0.663036 | 0.091081 | 4.826639 | 1        | 1           |
| MUT     | 1 | 1313.226661 | 4.884871 | 0.67061  | 35.58245 | 0.189027 | 1           |
| MUTYH   | 1 | 1329.618489 | 4.824333 | 0.662306 | 35.14116 | 0.191228 | 1           |
| MVB12A  | 2 | 8773.044995 | 1.456153 | 0.351237 | 6.036901 | 0.650618 | 1           |
| MVP     | 1 | 1944.874996 | 3.290056 | 0.451777 | 23.95974 | 0.267056 | 1           |
| MXRA5   | 2 | 3518.891546 | 3.70896  | 0.894428 | 15.3801  | 0.107872 | 1           |
| MYADML2 | 3 | 11731.75945 | 1.65707  | 0.510848 | 5.375143 | 0.434115 | 1           |
| MYBBP1A | 2 | 26566.28028 | 0.445618 | 0.107498 | 1.847247 | 0.434401 | 1           |
| MYBL1   | 2 | 2905.838325 | 4.502554 | 1.085717 | 18.67243 | 0.078103 | 1           |
| MYBPC1  | 1 | 974.9841151 | 6.588431 | 0.904249 | 48.00382 | 0.14403  | 1           |
| MYBPC2  | 2 | 5607.537432 | 2.307875 | 0.556631 | 9.568794 | 0.224167 | 1           |
| MYBPC3  | 1 | 4197.403032 | 1.510694 | 0.207498 | 10.99865 | 0.489959 | 1           |
| MYBPHL  | 1 | 1614.152271 | 3.969407 | 0.545007 | 28.91004 | 0.22715  | 1           |
| MYCBP2  | 1 | 3742.156107 | 1.697594 | 0.233163 | 12.35973 | 0.451047 | 1           |
| MYD88   | 1 | 597.8034997 | 10.76154 | 1.476077 | 78.4585  | 0.090969 | 1           |
| MYH10   | 1 | 652.7733275 | 9.853156 | 1.351665 | 71.82601 | 0.098905 | 1           |
| MYH13   | 3 | 18105.20217 | 1.045201 | 0.322234 | 3.39022  | 0.763595 | 1           |
| MYH14   | 1 | 8036.927525 | 0.776732 | 0.106698 | 5.654399 | 1        | 1           |
| MYH2    | 2 | 4765.942477 | 2.724706 | 0.657138 | 11.29752 | 0.175428 | 1           |
| MYH4    | 3 | 7621.807093 | 2.594343 | 0.799734 | 8.416068 | 0.120539 | 1           |
| MYH7B   | 3 | 15840.86045 | 1.206195 | 0.371864 | 3.912473 | 0.738816 | 1           |
| MYL5    | 2 | 12037.47349 | 1.046987 | 0.252553 | 4.340406 | 0.717284 | 1           |
| MYL7    | 1 | 229.5375271 | 28.06831 | 3.83994  | 205.1672 | 0.036087 | 1           |
| MYLK2   | 1 | 4934.589103 | 1.281178 | 0.175979 | 9.327334 | 0.547426 | 1           |
| MYO10   | 1 | 4198.08521  | 1.510444 | 0.207463 | 10.99683 | 0.490042 | 1           |
| MYO15A  | 2 | 10204.1117  | 1.244554 | 0.300204 | 5.159548 | 0.677326 | 1           |
| MYO16   | 1 | 2988.805548 | 2.131948 | 0.292801 | 15.52316 | 0.380204 | 1           |
| MYO3B   | 1 | 2836.942925 | 2.247445 | 0.308658 | 16.3644  | 0.364859 | 1           |
| MYO5B   | 1 | 16214.57005 | 0.372064 | 0.051113 | 2.70836  | 0.517444 | 1           |
| MYO5C   | 4 | 13341.08815 | 1.983471 | 0.70588  | 5.573404 | 0.160871 | 1           |
| MYO6    | 1 | 6119.979317 | 1.028058 | 0.141217 | 7.484264 | 0.626746 | 1           |
| MYO7A   | 2 | 6925.332428 | 1.858704 | 0.448317 | 7.706108 | 0.302042 | 1           |
| MYOCD   | 2 | 6297.308306 | 2.049319 | 0.494284 | 8.496557 | 0.264849 | 1           |
| MYOF    | 3 | 19250.63974 | 0.978186 | 0.301575 | 3.172833 | 1        | 1           |
| MYOM2   | 2 | 9638.706905 | 1.320647 | 0.318556 | 5.475048 | 0.666081 | 1           |

|         |   |             |          |          |          |          |   |
|---------|---|-------------|----------|----------|----------|----------|---|
| MYOM3   | 1 | 6183.889659 | 1.017168 | 0.139721 | 7.404973 | 1        | 1 |
| MYOZ1   | 1 | 604.4929965 | 10.64217 | 1.459729 | 77.5868  | 0.091838 | 1 |
| MYT1    | 1 | 1054.964881 | 6.086994 | 0.835491 | 44.34697 | 0.154895 | 1 |
| MZT2A   | 1 | 860.5461015 | 7.46799  | 1.024832 | 54.41953 | 0.128312 | 1 |
| N4BP2   | 1 | 12287.01342 | 0.499191 | 0.068576 | 3.633822 | 0.722462 | 1 |
| N4BP3   | 1 | 11045.80815 | 0.558166 | 0.076676 | 4.06316  | 1        | 1 |
| NAALADL | 1 | 7207.171289 | 0.869109 | 0.119386 | 6.326964 | 1        | 1 |
| NAIF1   | 1 | 297.3993391 | 21.65771 | 2.965773 | 158.1566 | 0.046314 | 1 |
| NAPRT1  | 2 | 2474.370105 | 5.296864 | 1.277149 | 21.96828 | 0.059066 | 1 |
| NARF    | 2 | 1439.46066  | 9.142918 | 2.203622 | 37.93433 | 0.022152 | 1 |
| NARG2   | 1 | 843.4755842 | 7.619649 | 1.04562  | 55.52594 | 0.125805 | 1 |
| NARS    | 1 | 962.7668419 | 6.672362 | 0.915757 | 48.61596 | 0.142389 | 1 |
| NAV2    | 1 | 19516.35855 | 0.30478  | 0.04187  | 2.218559 | 0.368438 | 1 |
| NBAS    | 2 | 5838.395291 | 2.214538 | 0.534124 | 9.181715 | 0.237702 | 1 |
| NBR1    | 1 | 2028.330254 | 3.153632 | 0.433053 | 22.96577 | 0.276743 | 1 |
| NCOA7   | 1 | 2175.309879 | 2.938817 | 0.403568 | 21.40073 | 0.293595 | 1 |
| NDC1    | 1 | 3003.788384 | 2.121186 | 0.291324 | 15.44477 | 0.381698 | 1 |
| NDRG2   | 1 | 819.4627134 | 7.84368  | 1.076327 | 57.16042 | 0.122451 | 1 |
| NDUFA9  | 1 | 4784.89923  | 1.32206  | 0.181594 | 9.625027 | 0.536282 | 1 |
| NDUFB5  | 1 | 2656.086249 | 2.402223 | 0.329908 | 17.49179 | 0.346102 | 1 |
| NDUFV3  | 1 | 677.568972  | 9.491642 | 1.302142 | 69.18695 | 0.10249  | 1 |
| NEB     | 2 | 56259.02163 | 0.182649 | 0.044062 | 0.757125 | 0.006637 | 1 |
| NEDD9   | 1 | 6130.236606 | 1.026295 | 0.140975 | 7.471427 | 0.627354 | 1 |
| NEK5    | 2 | 2882.424138 | 4.539556 | 1.094636 | 18.82596 | 0.076999 | 1 |
| NEU2    | 1 | 5309.14355  | 1.188983 | 0.163318 | 8.656011 | 0.574087 | 1 |
| NEU4    | 1 | 4041.707228 | 1.569877 | 0.215625 | 11.42963 | 0.477016 | 1 |
| NFKBIA  | 1 | 428.5042819 | 15.02349 | 2.059338 | 109.6008 | 0.066154 | 1 |
| NFYC    | 1 | 531.2337534 | 12.1133  | 1.66115  | 88.33159 | 0.081209 | 1 |
| NGF     | 2 | 2782.809301 | 4.70394  | 1.134255 | 19.508   | 0.072502 | 1 |
| NHP2    | 1 | 268.1452867 | 24.02332 | 3.288549 | 175.4938 | 0.0419   | 1 |
| NHSL1   | 1 | 10760.58216 | 0.57364  | 0.078802 | 4.175818 | 1        | 1 |
| NHSL2   | 1 | 8906.240584 | 0.698415 | 0.095941 | 5.08421  | 1        | 1 |
| NID2    | 1 | 7753.901248 | 0.80602  | 0.110721 | 5.86763  | 1        | 1 |
| NIFK    | 1 | 337.1672171 | 19.10023 | 2.616557 | 139.427  | 0.052369 | 1 |
| NIN     | 1 | 6824.531591 | 0.919276 | 0.126276 | 6.692222 | 1        | 1 |
| NINJ2   | 1 | 244.4809969 | 26.35111 | 3.605943 | 192.5658 | 0.038233 | 1 |
| NISCH   | 1 | 3507.003773 | 1.813141 | 0.249028 | 13.20123 | 0.429831 | 1 |
| NKD2    | 2 | 3618.758862 | 3.605151 | 0.869403 | 14.94947 | 0.112986 | 1 |
| NKPD1   | 1 | 226.4180286 | 28.45537 | 3.892668 | 208.0086 | 0.035473 | 1 |
| NLE1    | 1 | 5131.609523 | 1.231005 | 0.169089 | 8.96199  | 0.561666 | 1 |
| NLRP2   | 2 | 7920.716472 | 1.618509 | 0.390392 | 6.710107 | 0.3604   | 1 |
| NLRP6   | 1 | 2107.548094 | 3.03413  | 0.416651 | 22.09512 | 0.285962 | 1 |
| NLRP7   | 1 | 2621.584818 | 2.434175 | 0.334294 | 17.72454 | 0.342519 | 1 |
| NMBR    | 4 | 8253.515078 | 3.274598 | 1.165268 | 9.202164 | 0.041551 | 1 |
| NMRK1   | 1 | 1855.328299 | 3.450086 | 0.473741 | 25.12576 | 0.256409 | 1 |
| NMUR2   | 1 | 6011.213375 | 1.047123 | 0.143835 | 7.623082 | 0.620056 | 1 |
| NNT     | 1 | 3154.956282 | 2.018322 | 0.277201 | 14.69558 | 0.396549 | 1 |
| NOA1    | 2 | 2073.684671 | 6.330514 | 1.526216 | 26.25802 | 0.043187 | 1 |
| NOC3L   | 2 | 4414.551411 | 2.945778 | 0.710439 | 12.21443 | 0.155698 | 1 |
| NOD2    | 1 | 14332.83079 | 0.424278 | 0.058285 | 3.088467 | 0.72751  | 1 |
| NOL6    | 2 | 7851.119222 | 1.633323 | 0.393965 | 6.771534 | 0.356343 | 1 |
| NOL8    | 2 | 6511.777445 | 1.98009  | 0.477589 | 8.209473 | 0.27759  | 1 |
| NOM1    | 1 | 4337.582884 | 1.461043 | 0.20068  | 10.63709 | 0.501462 | 1 |
| NOS3    | 2 | 1940.771786 | 6.767661 | 1.631534 | 28.07249 | 0.038329 | 1 |
| NOTCH3  | 3 | 17606.88761 | 1.077077 | 0.332061 | 3.493624 | 0.757558 | 1 |
| NOX1    | 2 | 5558.152689 | 2.328849 | 0.561688 | 9.655774 | 0.221233 | 1 |
| NOXA1   | 1 | 3244.670101 | 1.961808 | 0.269441 | 14.28397 | 0.405235 | 1 |
| NPDC1   | 1 | 1025.40304  | 6.263218 | 0.859657 | 45.63206 | 0.150837 | 1 |
| NPHP3   | 1 | 4724.130188 | 1.339397 | 0.183974 | 9.751266 | 0.531674 | 1 |
| NPHP4   | 5 | 20040.55762 | 1.649907 | 0.646326 | 4.211797 | 0.247046 | 1 |
| NQO1    | 2 | 1457.887714 | 9.02669  | 2.175635 | 37.45165 | 0.022698 | 1 |
| NQO2    | 2 | 6402.120997 | 2.014907 | 0.485985 | 8.353854 | 0.271071 | 1 |
| NR1H3   | 1 | 529.1901371 | 12.16018 | 1.667567 | 88.67405 | 0.080916 | 1 |
| NR1H4   | 1 | 1306.564839 | 4.909908 | 0.674045 | 35.76497 | 0.188248 | 1 |
| NR4A1   | 1 | 5729.738599 | 1.099823 | 0.151073 | 8.006801 | 0.602267 | 1 |
| NRBP2   | 1 | 846.8301409 | 7.589364 | 1.041469 | 55.30499 | 0.126363 | 1 |
| NRCAM   | 1 | 1074.288002 | 5.977047 | 0.820413 | 43.54523 | 0.157456 | 1 |
| NRDE2   | 1 | 4618.600744 | 1.370586 | 0.188258 | 9.978382 | 0.523637 | 1 |
| NRG1    | 3 | 15440.88177 | 1.239541 | 0.382143 | 4.020644 | 0.73532  | 1 |
| NRG2    | 1 | 3727.788195 | 1.704236 | 0.234075 | 12.4081  | 0.449805 | 1 |
| NRIP1   | 1 | 3296.38798  | 1.930626 | 0.26516  | 14.05687 | 0.410102 | 1 |
| NRXN1   | 1 | 2641.023904 | 2.416069 | 0.331808 | 17.59265 | 0.344524 | 1 |
| NSMAF   | 1 | 685.2980049 | 9.384302 | 1.287437 | 68.40342 | 0.103491 | 1 |

|         |   |             |          |          |          |          |   |
|---------|---|-------------|----------|----------|----------|----------|---|
| NSUN2   | 1 | 486.1010709 | 13.24036 | 1.815402 | 96.56652 | 0.074596 | 1 |
| NT5C    | 2 | 4695.552439 | 2.766341 | 0.667176 | 11.4702  | 0.171458 | 1 |
| NT5C1B  | 1 | 2199.868289 | 2.905723 | 0.399025 | 21.15963 | 0.296422 | 1 |
| NTN5    | 1 | 5714.389507 | 1.102846 | 0.151488 | 8.028813 | 0.601231 | 1 |
| NTSR1   | 4 | 3825.874988 | 7.192839 | 2.558911 | 20.21834 | 0.003169 | 1 |
| NUBPL   | 1 | 1027.434592 | 6.250783 | 0.857951 | 45.54138 | 0.151108 | 1 |
| NUCB1   | 1 | 897.0643242 | 7.162935 | 0.983014 | 52.1942  | 0.133306 | 1 |
| NUDCD3  | 1 | 537.5000579 | 11.97178 | 1.641778 | 87.29777 | 0.082233 | 1 |
| NUGGC   | 1 | 1166.366422 | 5.503166 | 0.755422 | 40.08997 | 0.169748 | 1 |
| NUMA1   | 7 | 13632.15752 | 3.701246 | 1.637026 | 8.368356 | 0.005281 | 1 |
| NUP153  | 1 | 4566.040183 | 1.386658 | 0.190465 | 10.09542 | 0.519529 | 1 |
| NUP98   | 2 | 10260.9025  | 1.237375 | 0.298472 | 5.129781 | 0.6785   | 1 |
| NUTM2G  | 1 | 3500.851668 | 1.816372 | 0.249472 | 13.22476 | 0.429279 | 1 |
| NVL     | 3 | 8959.695231 | 2.194841 | 0.676605 | 7.119852 | 0.170038 | 1 |
| NXF5    | 2 | 5569.256839 | 2.324101 | 0.560544 | 9.636082 | 0.221878 | 1 |
| NXNL1   | 1 | 2642.590028 | 2.414622 | 0.33161  | 17.58211 | 0.344735 | 1 |
| OAS3    | 2 | 6353.049145 | 2.030877 | 0.489836 | 8.420079 | 0.268167 | 1 |
| OBSCN   | 9 | 54353.55941 | 1.053011 | 0.501303 | 2.211899 | 0.84881  | 1 |
| OBSL1   | 1 | 6918.826023 | 0.906398 | 0.124507 | 6.598459 | 1        | 1 |
| OC90    | 1 | 2131.398888 | 2.999891 | 0.411951 | 21.84567 | 0.288591 | 1 |
| OCA2    | 2 | 3500.73056  | 3.728474 | 0.899132 | 15.46105 | 0.106958 | 1 |
| OCM     | 1 | 713.983269  | 9.006245 | 1.235642 | 65.64399 | 0.107628 | 1 |
| ODF2L   | 1 | 6304.626654 | 0.997198 | 0.136978 | 7.259567 | 1        | 1 |
| OGDHL   | 1 | 3927.844725 | 1.616128 | 0.221976 | 11.76646 | 0.467292 | 1 |
| OGFOD2  | 1 | 1404.746335 | 4.56495  | 0.626721 | 33.25048 | 0.200869 | 1 |
| OGFR    | 2 | 5725.950431 | 2.25906  | 0.54486  | 9.366352 | 0.231103 | 1 |
| OLAH    | 1 | 291.4173785 | 22.10281 | 3.026522 | 161.4177 | 0.045402 | 1 |
| OLFML1  | 1 | 530.3594326 | 12.13331 | 1.66389  | 88.47778 | 0.081062 | 1 |
| OLFML2A | 1 | 2068.104628 | 3.092487 | 0.424661 | 22.52029 | 0.281367 | 1 |
| OPRM1   | 1 | 4245.254726 | 1.493376 | 0.20512  | 10.87254 | 0.493904 | 1 |
| OPTC    | 1 | 2278.626719 | 2.804404 | 0.385118 | 20.42151 | 0.305285 | 1 |
| OR10A6  | 2 | 9681.929025 | 1.314517 | 0.317077 | 5.449629 | 0.666909 | 1 |
| OR10G4  | 1 | 788.2987928 | 8.154779 | 1.118965 | 59.43031 | 0.1181   | 1 |
| OR10G9  | 1 | 327.886728  | 19.64156 | 2.690497 | 143.3903 | 0.05101  | 1 |
| OR10J1  | 2 | 6530.861895 | 1.97415  | 0.476157 | 8.184841 | 0.278716 | 1 |
| OR10V1  | 2 | 10858.83681 | 1.166342 | 0.28134  | 4.835263 | 0.691154 | 1 |
| OR10X1  | 1 | 4395.992088 | 1.44129  | 0.197967 | 10.49324 | 0.50612  | 1 |
| OR11L1  | 1 | 957.9365317 | 6.706136 | 0.920388 | 48.86229 | 0.141704 | 1 |
| OR13C4  | 1 | 1287.167951 | 4.984284 | 0.684248 | 36.30714 | 0.185649 | 1 |
| OR13H1  | 1 | 523.005101  | 12.30429 | 1.687293 | 89.72686 | 0.080037 | 1 |
| OR1I1   | 1 | 7573.598849 | 0.825819 | 0.11344  | 6.011781 | 1        | 1 |
| OR1L6   | 1 | 603.5237108 | 10.6593  | 1.462076 | 77.71191 | 0.091838 | 1 |
| OR1S1   | 1 | 3022.229298 | 2.108087 | 0.289525 | 15.34937 | 0.383487 | 1 |
| OR2A7   | 1 | 3812.236209 | 1.665916 | 0.228813 | 12.12903 | 0.457217 | 1 |
| OR2C1   | 3 | 5279.965844 | 3.780983 | 1.165418 | 12.2667  | 0.051462 | 1 |
| OR2G3   | 1 | 5788.585313 | 1.088382 | 0.149502 | 7.923493 | 0.606069 | 1 |
| OR2H1   | 1 | 5208.694667 | 1.212407 | 0.166535 | 8.826572 | 0.567112 | 1 |
| OR2M5   | 1 | 7055.135851 | 0.88839  | 0.122034 | 6.467348 | 1        | 1 |
| OR2T11  | 2 | 2705.993517 | 4.838966 | 1.166798 | 20.06825 | 0.069066 | 1 |
| OR2T34  | 1 | 2847.0882   | 2.239345 | 0.307546 | 16.3054  | 0.36588  | 1 |
| OR4A47  | 2 | 5600.522754 | 2.310832 | 0.557344 | 9.581055 | 0.223756 | 1 |
| OR4B1   | 1 | 10900.3759  | 0.565955 | 0.077746 | 4.119866 | 1        | 1 |
| OR4D5   | 2 | 5758.641448 | 2.245937 | 0.541696 | 9.311929 | 0.233046 | 1 |
| OR4F5   | 1 | 7734.280345 | 0.80813  | 0.11101  | 5.882991 | 1        | 1 |
| OR4P4   | 1 | 1922.717723 | 3.328265 | 0.457021 | 24.23814 | 0.264467 | 1 |
| OR4S1   | 2 | 4712.07126  | 2.756458 | 0.664793 | 11.42921 | 0.172364 | 1 |
| OR4X1   | 1 | 1856.198103 | 3.448458 | 0.473517 | 25.1139  | 0.256528 | 1 |
| OR51B4  | 1 | 3760.577095 | 1.689153 | 0.232003 | 12.29826 | 0.452729 | 1 |
| OR51B5  | 1 | 3032.433824 | 2.100907 | 0.28854  | 15.29707 | 0.384479 | 1 |
| OR51I2  | 1 | 11440.84914 | 0.538007 | 0.073908 | 3.916407 | 1        | 1 |
| OR51L1  | 1 | 10680.88532 | 0.578112 | 0.079416 | 4.208372 | 1        | 1 |
| OR51Q1  | 2 | 9887.494436 | 1.286093 | 0.310222 | 5.331777 | 0.670924 | 1 |
| OR51V1  | 2 | 9363.832455 | 1.36096  | 0.328278 | 5.642196 | 0.660907 | 1 |
| OR52E2  | 2 | 7594.715361 | 1.690242 | 0.407691 | 7.007554 | 0.341439 | 1 |
| OR52K2  | 1 | 6933.32532  | 0.904449 | 0.12424  | 6.584268 | 1        | 1 |
| OR52N4  | 4 | 11111.66264 | 2.403724 | 0.855417 | 6.754473 | 0.099119 | 1 |
| OR5AP2  | 1 | 1256.024371 | 5.108507 | 0.701288 | 37.21272 | 0.181604 | 1 |
| OR5B3   | 1 | 856.6464121 | 7.502104 | 1.029508 | 54.6684  | 0.127756 | 1 |
| OR5C1   | 1 | 1241.031714 | 5.170532 | 0.709796 | 37.66488 | 0.179639 | 1 |
| OR5F1   | 3 | 10310.61336 | 1.896645 | 0.584694 | 6.152386 | 0.22503  | 1 |
| OR5K1   | 4 | 6598.283534 | 4.12393  | 1.467421 | 11.58958 | 0.020452 | 1 |
| OR5M1   | 1 | 2005.395333 | 3.189992 | 0.438043 | 23.23068 | 0.274072 | 1 |
| OR5T2   | 3 | 14943.47898 | 1.283499 | 0.395694 | 4.163242 | 0.513464 | 1 |

|          |   |             |          |          |          |          |   |
|----------|---|-------------|----------|----------|----------|----------|---|
| OR5V1    | 1 | 1826.592356 | 3.504766 | 0.481245 | 25.52419 | 0.253066 | 1 |
| OR5W2    | 1 | 772.2164259 | 8.325147 | 1.142313 | 60.67346 | 0.115846 | 1 |
| OR6B3    | 1 | 414.9072135 | 15.51667 | 2.126784 | 113.2071 | 0.064069 | 1 |
| OR6C2    | 1 | 5622.368418 | 1.121316 | 0.154025 | 8.163298 | 0.595217 | 1 |
| OR6N1    | 1 | 2444.1293   | 2.612769 | 0.358811 | 19.02549 | 0.323446 | 1 |
| OR8B4    | 2 | 4877.432867 | 2.661221 | 0.641831 | 11.03421 | 0.181753 | 1 |
| OR8D1    | 3 | 15758.71625 | 1.212906 | 0.373932 | 3.93424  | 0.738073 | 1 |
| OR8D4    | 1 | 2730.435868 | 2.336112 | 0.320831 | 17.01024 | 0.353835 | 1 |
| OR8I2    | 1 | 398.6882893 | 16.14894 | 2.213236 | 117.8312 | 0.06168  | 1 |
| OR9G4    | 1 | 1940.610612 | 3.297342 | 0.452777 | 24.01283 | 0.266586 | 1 |
| OSBPL1A  | 3 | 7014.835785 | 2.825839 | 0.871079 | 9.167212 | 0.100231 | 1 |
| OSBPL7   | 1 | 1822.821188 | 3.51207  | 0.482247 | 25.57741 | 0.252587 | 1 |
| OSBPL9   | 1 | 2217.073998 | 2.882974 | 0.395903 | 20.9939  | 0.298339 | 1 |
| OSGIN1   | 1 | 2717.879462 | 2.347023 | 0.322329 | 17.08972 | 0.352587 | 1 |
| OTC      | 1 | 7494.103093 | 0.834851 | 0.114681 | 6.077541 | 1        | 1 |
| OTOF     | 3 | 13522.99499 | 1.426837 | 0.439879 | 4.628237 | 0.47476  | 1 |
| OTOP2    | 3 | 2391.652253 | 8.445061 | 2.602063 | 27.40866 | 0.006551 | 1 |
| OXER1    | 1 | 1852.908309 | 3.454626 | 0.474364 | 25.15884 | 0.256171 | 1 |
| OXNAD1   | 1 | 694.3036164 | 9.262249 | 1.270716 | 67.51252 | 0.104777 | 1 |
| P2RX2    | 1 | 1231.354701 | 5.211368 | 0.715398 | 37.96259 | 0.178327 | 1 |
| PABPC3   | 1 | 1583.396445 | 4.047006 | 0.555656 | 29.47556 | 0.223306 | 1 |
| PACSIN2  | 1 | 870.4269367 | 7.382925 | 1.013171 | 53.79897 | 0.129563 | 1 |
| PACSIN3  | 1 | 7074.116931 | 0.885938 | 0.121697 | 6.449492 | 1        | 1 |
| PADI3    | 2 | 4422.750294 | 2.940219 | 0.709099 | 12.19137 | 0.156143 | 1 |
| PADI4    | 1 | 15182.11888 | 0.39911  | 0.054828 | 2.905246 | 0.516139 | 1 |
| PAK1IP1  | 1 | 158.4267313 | 40.67845 | 5.554602 | 297.9036 | 0.024977 | 1 |
| PAK4     | 1 | 1195.137383 | 5.37007  | 0.737166 | 39.11959 | 0.173586 | 1 |
| PALB2    | 2 | 5447.834145 | 2.377074 | 0.573317 | 9.85577  | 0.214793 | 1 |
| PALLD    | 1 | 2827.152485 | 2.255317 | 0.309739 | 16.42173 | 0.363836 | 1 |
| PALM2-AI | 1 | 5009.340538 | 1.261677 | 0.173301 | 9.185335 | 0.552827 | 1 |
| PALM3    | 5 | 9219.184461 | 3.754234 | 1.470488 | 9.584759 | 0.014986 | 1 |
| PALMD    | 1 | 1581.963622 | 4.050695 | 0.556162 | 29.50244 | 0.223181 | 1 |
| PAN2     | 1 | 1719.553845 | 3.724527 | 0.511404 | 27.12553 | 0.240155 | 1 |
| PAPPA    | 1 | 2636.29918  | 2.420445 | 0.332409 | 17.62453 | 0.343997 | 1 |
| PARD3    | 1 | 1405.582509 | 4.562219 | 0.626346 | 33.23058 | 0.200997 | 1 |
| PARD6B   | 1 | 1546.991592 | 4.142847 | 0.568806 | 30.17403 | 0.218818 | 1 |
| PARK2    | 1 | 4427.909417 | 1.430716 | 0.196515 | 10.41624 | 0.508672 | 1 |
| PARP3    | 1 | 2146.973226 | 2.977943 | 0.408938 | 21.68578 | 0.290415 | 1 |
| PARP4    | 2 | 3350.722255 | 3.89775  | 0.939937 | 16.16327 | 0.099432 | 1 |
| PARS2    | 1 | 575.1683039 | 11.18606 | 1.534207 | 81.55871 | 0.08763  | 1 |
| PASD1    | 2 | 5490.864233 | 2.358033 | 0.568726 | 9.776805 | 0.217308 | 1 |
| PASK     | 2 | 10135.91686 | 1.253282 | 0.302309 | 5.195735 | 0.675934 | 1 |
| PAX3     | 3 | 7902.334942 | 2.499367 | 0.770463 | 8.107904 | 0.130393 | 1 |
| PBRM1    | 1 | 844.6875132 | 7.60868  | 1.044117 | 55.44591 | 0.126084 | 1 |
| PBXIP1   | 1 | 2278.781148 | 2.804212 | 0.385091 | 20.42011 | 0.305285 | 1 |
| PCDH11X  | 1 | 855.5013508 | 7.512179 | 1.030889 | 54.7419  | 0.127616 | 1 |
| PCDH15   | 1 | 5779.331453 | 1.090165 | 0.149747 | 7.936481 | 0.605427 | 1 |
| PCDH9    | 1 | 1260.988777 | 5.088295 | 0.698516 | 37.06537 | 0.182257 | 1 |
| PCDHA11  | 3 | 10187.86261 | 1.920474 | 0.592039 | 6.229695 | 0.219866 | 1 |
| PCDHA12  | 1 | 7901.957356 | 0.790437 | 0.10858  | 5.75418  | 1        | 1 |
| PCDHA3   | 1 | 1525.968073 | 4.200277 | 0.576686 | 30.59258 | 0.216189 | 1 |
| PCDHA4   | 1 | 5718.683713 | 1.101999 | 0.151372 | 8.022643 | 0.601555 | 1 |
| PCDHA7   | 2 | 2347.336709 | 5.586368 | 1.346913 | 23.16966 | 0.053828 | 1 |
| PCDHA9   | 2 | 8246.818233 | 1.552428 | 0.374455 | 6.4361   | 0.379178 | 1 |
| PCDHAC2  | 1 | 2592.749961 | 2.461531 | 0.33805  | 17.92381 | 0.339448 | 1 |
| PCDHB10  | 2 | 16356.56101 | 0.756624 | 0.182517 | 3.136578 | 1        | 1 |
| PCDHB15  | 3 | 11175.10897 | 1.74365  | 0.537535 | 5.656028 | 0.261954 | 1 |
| PCDHB5   | 1 | 4718.492989 | 1.341027 | 0.184198 | 9.763141 | 0.531218 | 1 |
| PCDHB6   | 4 | 18319.23273 | 1.41428  | 0.503335 | 3.973872 | 0.533668 | 1 |
| PCDHB8   | 3 | 16414.96891 | 1.161173 | 0.357985 | 3.766423 | 0.744369 | 1 |
| PCDHGA1  | 2 | 5377.166334 | 2.409005 | 0.581016 | 9.988197 | 0.210647 | 1 |
| PCDHGA2  | 1 | 12563.42123 | 0.487644 | 0.066989 | 3.549762 | 0.722307 | 1 |
| PCDHGA5  | 1 | 1217.84582  | 5.269459 | 0.723366 | 38.38609 | 0.176618 | 1 |
| PCDHGA7  | 1 | 6733.071756 | 0.932111 | 0.128039 | 6.785675 | 1        | 1 |
| PCDHGA8  | 1 | 9802.268805 | 0.632229 | 0.08685  | 4.602353 | 1        | 1 |
| PCDHGB1  | 4 | 11680.80745 | 2.281189 | 0.811817 | 6.410098 | 0.113613 | 1 |
| PCDHGB6  | 1 | 2446.194485 | 2.610542 | 0.358506 | 19.00926 | 0.323664 | 1 |
| PCDP1    | 1 | 1355.36926  | 4.732188 | 0.649665 | 34.46949 | 0.194454 | 1 |
| PCF11    | 1 | 1678.626651 | 3.815961 | 0.523951 | 27.79183 | 0.23515  | 1 |
| PCK2     | 2 | 5253.989144 | 2.466717 | 0.594932 | 10.22754 | 0.203486 | 1 |
| PCM1     | 1 | 12814.11434 | 0.477602 | 0.06561  | 3.476658 | 0.72241  | 1 |
| PCNT     | 2 | 11010.96208 | 1.149501 | 0.277278 | 4.765437 | 0.694454 | 1 |
| PCNXL2   | 5 | 11933.95955 | 2.867711 | 1.123304 | 7.32105  | 0.039827 | 1 |

|          |   |             |          |          |          |          |   |
|----------|---|-------------|----------|----------|----------|----------|---|
| PCNXL3   | 1 | 1567.932588 | 4.087173 | 0.561167 | 29.76829 | 0.221439 | 1 |
| PCOLCE2  | 1 | 812.1560152 | 7.914478 | 1.086031 | 57.67697 | 0.12147  | 1 |
| PCYOX1L  | 1 | 468.1589816 | 13.74877 | 1.884968 | 100.2822 | 0.071938 | 1 |
| PDCD11   | 3 | 10131.36517 | 1.931636 | 0.595479 | 6.265907 | 0.217482 | 1 |
| PDCD4    | 1 | 591.7375721 | 10.87212 | 1.491219 | 79.26602 | 0.090099 | 1 |
| PDE11A   | 2 | 16539.07549 | 0.747693 | 0.180363 | 3.099554 | 1        | 1 |
| PDE4D    | 1 | 401.9678575 | 16.01697 | 2.195193 | 116.866  | 0.062129 | 1 |
| PDE6A    | 1 | 3245.50125  | 1.961299 | 0.269371 | 14.28026 | 0.405331 | 1 |
| PDGFRL   | 2 | 3915.784237 | 3.327696 | 0.802516 | 13.79855 | 0.128535 | 1 |
| PDHA2    | 1 | 4536.259042 | 1.39593  | 0.191738 | 10.16294 | 0.517189 | 1 |
| PDHX     | 2 | 8420.148625 | 1.519387 | 0.366487 | 6.299098 | 0.389058 | 1 |
| PDLIM5   | 2 | 8056.374036 | 1.59037  | 0.383606 | 6.593426 | 0.3682   | 1 |
| PDLIM7   | 1 | 2407.914093 | 2.652451 | 0.364259 | 19.31456 | 0.319524 | 1 |
| PDPR     | 1 | 5699.195796 | 1.105855 | 0.151901 | 8.050719 | 0.600256 | 1 |
| PDXDC1   | 1 | 2915.466052 | 2.186223 | 0.300253 | 15.91848 | 0.372779 | 1 |
| PDZD2    | 2 | 10361.52892 | 1.224847 | 0.295451 | 5.077837 | 0.680595 | 1 |
| PDZD7    | 1 | 1121.883688 | 5.722384 | 0.785488 | 41.68831 | 0.163891 | 1 |
| PEAK1    | 1 | 4585.634814 | 1.380623 | 0.189636 | 10.05147 | 0.521083 | 1 |
| PEAR1    | 3 | 7188.116906 | 2.755763 | 0.849483 | 8.93983  | 0.105865 | 1 |
| PEG3     | 2 | 4187.357361 | 3.108463 | 0.749662 | 12.8892  | 0.143142 | 1 |
| PELI2    | 1 | 2456.811922 | 2.599149 | 0.356942 | 18.92627 | 0.324857 | 1 |
| PER1     | 3 | 4720.959098 | 4.238289 | 1.306326 | 13.75085 | 0.039073 | 1 |
| PEX1     | 2 | 1589.156333 | 8.276714 | 1.995027 | 34.33738 | 0.026607 | 1 |
| PEX10    | 1 | 400.0650237 | 16.09328 | 2.205626 | 117.4241 | 0.06183  | 1 |
| PEX11G   | 2 | 6607.246461 | 1.950719 | 0.470507 | 8.087676 | 0.28322  | 1 |
| PEX26    | 1 | 169.902099  | 37.92925 | 5.181332 | 277.656  | 0.026838 | 1 |
| PGLYRP3  | 1 | 5951.78739  | 1.057834 | 0.145306 | 7.701072 | 0.616387 | 1 |
| PGM5     | 1 | 3297.605978 | 1.929904 | 0.265061 | 14.0516  | 0.410293 | 1 |
| PHACTR3  | 1 | 533.6810408 | 12.05764 | 1.65353  | 87.92494 | 0.081648 | 1 |
| PHC1     | 2 | 4785.573526 | 2.713313 | 0.654391 | 11.25026 | 0.176564 | 1 |
| PHF12    | 1 | 2423.40186  | 2.635335 | 0.361909 | 19.18987 | 0.321161 | 1 |
| PHIP     | 1 | 271.1623107 | 23.75574 | 3.252051 | 173.5321 | 0.042358 | 1 |
| PHKB     | 2 | 6664.623304 | 1.933472 | 0.466347 | 8.016155 | 0.286656 | 1 |
| PHLDB3   | 1 | 1902.77698  | 3.363414 | 0.461845 | 24.49424 | 0.262106 | 1 |
| PHLPP1   | 1 | 1888.589248 | 3.388873 | 0.46534  | 24.67975 | 0.260449 | 1 |
| PHTF2    | 1 | 1663.225139 | 3.851534 | 0.528833 | 28.05106 | 0.233188 | 1 |
| PI16     | 1 | 12112.73624 | 0.506742 | 0.069613 | 3.688795 | 1        | 1 |
| PIDD     | 2 | 5874.976392 | 2.200421 | 0.53072  | 9.123173 | 0.239885 | 1 |
| PIF1     | 2 | 7482.215977 | 1.716447 | 0.414011 | 7.116217 | 0.33483  | 1 |
| PIGO     | 1 | 1625.748726 | 3.94091  | 0.541097 | 28.70237 | 0.228633 | 1 |
| PIGQ     | 1 | 1482.788954 | 4.323336 | 0.593571 | 31.48946 | 0.210778 | 1 |
| PIGR     | 1 | 5033.900095 | 1.255397 | 0.172439 | 9.139602 | 0.554637 | 1 |
| PIK3C2B  | 2 | 13852.28418 | 0.902924 | 0.217805 | 3.743122 | 1        | 1 |
| PIK3C2G  | 1 | 4368.909668 | 1.450383 | 0.199216 | 10.55946 | 0.503957 | 1 |
| PIP5KL1  | 1 | 435.3375816 | 14.78727 | 2.02703  | 107.8737 | 0.067046 | 1 |
| PISD     | 1 | 973.4458952 | 6.598883 | 0.905682 | 48.08004 | 0.143757 | 1 |
| PKD1     | 2 | 16787.14439 | 0.735867 | 0.17751  | 3.050523 | 1        | 1 |
| PKHD1    | 1 | 6499.805074 | 0.966483 | 0.13276  | 7.035937 | 1        | 1 |
| PKHD1L1  | 1 | 15407.49059 | 0.392897 | 0.053974 | 2.860017 | 0.516001 | 1 |
| PKLR     | 1 | 1591.897978 | 4.025256 | 0.552671 | 29.31705 | 0.224424 | 1 |
| PKN3     | 1 | 1185.244881 | 5.415104 | 0.743343 | 39.44792 | 0.172265 | 1 |
| PKP2     | 1 | 4008.231901 | 1.583202 | 0.217455 | 11.52667 | 0.474134 | 1 |
| PKP3     | 7 | 17391.93633 | 2.855256 | 1.2629   | 6.455371 | 0.018705 | 1 |
| PLA2G12A | 1 | 1078.428587 | 5.954    | 0.817253 | 43.37717 | 0.157994 | 1 |
| PLA2G2D  | 1 | 1264.675756 | 5.073386 | 0.696471 | 36.95668 | 0.18278  | 1 |
| PLAT     | 1 | 1871.934441 | 3.419253 | 0.469509 | 24.9011  | 0.258432 | 1 |
| PLCD4    | 2 | 1800.197179 | 7.300247 | 1.759833 | 30.28333 | 0.033429 | 1 |
| PLD2     | 2 | 5213.649042 | 2.486211 | 0.599632 | 10.30839 | 0.201164 | 1 |
| PLEC     | 8 | 24986.44814 | 2.266324 | 1.044242 | 4.918617 | 0.055762 | 1 |
| PLEKHA4  | 1 | 12876.83406 | 0.475151 | 0.065273 | 3.458814 | 0.722472 | 1 |
| PLEKHA7  | 1 | 2906.738837 | 2.192864 | 0.301165 | 15.96685 | 0.371971 | 1 |
| PLEKHG2  | 3 | 15375.57092 | 1.24515  | 0.383872 | 4.038842 | 0.734783 | 1 |
| PLEKHG3  | 2 | 8840.500938 | 1.44464  | 0.34846  | 5.989165 | 0.651737 | 1 |
| PLEKHG4  | 2 | 2438.424204 | 5.375723 | 1.296153 | 22.29552 | 0.057563 | 1 |
| PLEKHG5  | 1 | 5015.861351 | 1.260004 | 0.173071 | 9.173149 | 0.553334 | 1 |
| PLEKHG6  | 1 | 1972.069296 | 3.244333 | 0.445502 | 23.62661 | 0.270221 | 1 |
| PLEKHH1  | 2 | 1762.743263 | 7.456478 | 1.797466 | 30.9319  | 0.032188 | 1 |
| PLEKHH3  | 2 | 2728.372665 | 4.798843 | 1.157128 | 19.90177 | 0.070042 | 1 |
| PLET1    | 1 | 5272.543855 | 1.197415 | 0.164476 | 8.717404 | 0.571588 | 1 |
| PLGRKT   | 1 | 3204.969516 | 1.986427 | 0.272821 | 14.46327 | 0.40139  | 1 |
| PLIN1    | 1 | 4782.219651 | 1.322816 | 0.181697 | 9.630526 | 0.536056 | 1 |
| PLIN2    | 1 | 2605.24044  | 2.449607 | 0.336413 | 17.83695 | 0.340721 | 1 |
| PLIN3    | 2 | 1573.574206 | 8.359194 | 2.014891 | 34.67986 | 0.026147 | 1 |

|          |   |             |          |          |          |          |   |
|----------|---|-------------|----------|----------|----------|----------|---|
| PLK4     | 1 | 4262.400644 | 1.487266 | 0.204281 | 10.82805 | 0.495294 | 1 |
| PLSCR2   | 1 | 4186.482437 | 1.514701 | 0.208048 | 11.02783 | 0.489051 | 1 |
| PLSCR5   | 1 | 1395.326147 | 4.595942 | 0.630973 | 33.47638 | 0.19959  | 1 |
| PLXNA2   | 3 | 8980.305125 | 2.189618 | 0.674995 | 7.102905 | 0.17082  | 1 |
| PMFBP1   | 1 | 6411.562946 | 0.980138 | 0.134635 | 7.135356 | 1        | 1 |
| PMP22    | 1 | 1049.537177 | 6.118606 | 0.839826 | 44.57749 | 0.15422  | 1 |
| PMS1     | 1 | 2153.226546 | 2.969221 | 0.407741 | 21.62223 | 0.291098 | 1 |
| PNLIPRP1 | 1 | 6540.145254 | 0.960364 | 0.131919 | 6.991381 | 1        | 1 |
| PNMT     | 1 | 1313.326196 | 4.884499 | 0.670559 | 35.57974 | 0.189027 | 1 |
| PNRC1    | 2 | 3738.337487 | 3.488149 | 0.841197 | 14.46412 | 0.119153 | 1 |
| PODN     | 1 | 1956.616597 | 3.270158 | 0.449046 | 23.81477 | 0.268464 | 1 |
| POLA1    | 1 | 1549.788512 | 4.135324 | 0.567774 | 30.1192  | 0.219193 | 1 |
| POLA2    | 1 | 1312.80654  | 4.886443 | 0.670826 | 35.59391 | 0.189027 | 1 |
| POLG     | 1 | 3394.206486 | 1.874248 | 0.257419 | 13.64626 | 0.419347 | 1 |
| POLQ     | 1 | 4086.858043 | 1.55225  | 0.213204 | 11.30127 | 0.480806 | 1 |
| POLR3E   | 1 | 2839.865769 | 2.245106 | 0.308337 | 16.34736 | 0.365165 | 1 |
| POM121   | 1 | 2048.274169 | 3.122675 | 0.428804 | 22.74023 | 0.279059 | 1 |
| POM121C  | 1 | 1098.109817 | 5.846828 | 0.802555 | 42.5957  | 0.16068  | 1 |
| POM121L  | 1 | 1548.110188 | 4.139835 | 0.568393 | 30.15208 | 0.218943 | 1 |
| POMGNT2  | 1 | 1206.420945 | 5.319604 | 0.730244 | 38.75167 | 0.175038 | 1 |
| POMK     | 1 | 770.267435  | 8.346276 | 1.145208 | 60.82765 | 0.115563 | 1 |
| POMT1    | 2 | 12129.81298 | 1.038616 | 0.250534 | 4.3057   | 0.719383 | 1 |
| POSTN    | 2 | 3681.788486 | 3.542532 | 0.854308 | 14.68971 | 0.11624  | 1 |
| POTEE    | 1 | 6778.450799 | 0.9257   | 0.127158 | 6.738992 | 1        | 1 |
| POU2F1   | 1 | 1449.659796 | 4.422724 | 0.607207 | 32.21384 | 0.206601 | 1 |
| POU4F3   | 1 | 217.2858492 | 29.65239 | 4.055691 | 216.7976 | 0.03409  | 1 |
| PPIL1    | 1 | 5007.874703 | 1.262054 | 0.173353 | 9.188079 | 0.552754 | 1 |
| PPP1R14C | 1 | 261.3792169 | 24.64585 | 3.373453 | 180.0582 | 0.040832 | 1 |
| PPP1R15B | 1 | 826.8718811 | 7.773167 | 1.066663 | 56.64596 | 0.12357  | 1 |
| PPP1R21  | 1 | 2222.897222 | 2.875355 | 0.394857 | 20.93839 | 0.299014 | 1 |
| PRDM5    | 1 | 3455.982412 | 1.840287 | 0.252756 | 13.39893 | 0.425122 | 1 |
| PRDM9    | 2 | 2858.755958 | 4.577575 | 1.103799 | 18.9837  | 0.075947 | 1 |
| PRF1     | 3 | 8272.492763 | 2.383904 | 0.734876 | 7.73327  | 0.143846 | 1 |
| PRKD1    | 1 | 720.9013857 | 8.919571 | 1.223766 | 65.0114  | 0.108624 | 1 |
| PRKD3    | 1 | 1313.910351 | 4.882316 | 0.67026  | 35.56383 | 0.189156 | 1 |
| PRODH    | 2 | 5313.103211 | 2.438687 | 0.588173 | 10.11129 | 0.206917 | 1 |
| PROS1    | 1 | 1190.6281   | 5.390505 | 0.739969 | 39.26858 | 0.173058 | 1 |
| PRR14    | 1 | 1310.153164 | 4.896391 | 0.672191 | 35.66643 | 0.188638 | 1 |
| PRR14L   | 3 | 14061.90949 | 1.369047 | 0.422065 | 4.440763 | 0.488959 | 1 |
| PRSS21   | 1 | 3293.691555 | 1.932228 | 0.26538  | 14.06853 | 0.409912 | 1 |
| PRSS23   | 1 | 403.6638434 | 15.94957 | 2.185978 | 116.373  | 0.062428 | 1 |
| PRSS38   | 1 | 13295.65086 | 0.459376 | 0.063106 | 3.343973 | 0.723231 | 1 |
| PRSS58   | 1 | 540.151457  | 11.91289 | 1.633716 | 86.86757 | 0.082526 | 1 |
| PRUNE2   | 1 | 8877.12207  | 0.70079  | 0.096267 | 5.101501 | 1        | 1 |
| PSD      | 2 | 7175.338716 | 1.792108 | 0.432257 | 7.429955 | 0.316796 | 1 |
| PSD4     | 2 | 14713.26368 | 0.847008 | 0.204318 | 3.511297 | 1        | 1 |
| PSG1     | 1 | 897.140945  | 7.162321 | 0.98293  | 52.18972 | 0.133306 | 1 |
| PSG8     | 2 | 971.3414823 | 13.57453 | 3.270251 | 56.34674 | 0.010578 | 1 |
| PSMA8    | 2 | 1577.031243 | 8.340754 | 2.01045  | 34.60329 | 0.026238 | 1 |
| PSMB11   | 2 | 3298.988506 | 3.959699 | 0.95487  | 16.42027 | 0.09686  | 1 |
| PSMB8    | 1 | 6393.555818 | 0.982971 | 0.135024 | 7.155981 | 1        | 1 |
| PSMB9    | 3 | 5245.645626 | 3.806251 | 1.173204 | 12.3487  | 0.050659 | 1 |
| PSMC3IP  | 1 | 459.8072119 | 13.99897 | 1.919197 | 102.1109 | 0.070755 | 1 |
| PSORS1C2 | 1 | 6721.372856 | 0.933778 | 0.128268 | 6.797813 | 1        | 1 |
| PSPH     | 1 | 575.7008869 | 11.17569 | 1.532787 | 81.48296 | 0.087775 | 1 |
| PTCHD1   | 1 | 105.8315539 | 60.90718 | 8.291705 | 447.3971 | 0.016876 | 1 |
| PTCHD4   | 1 | 488.8527138 | 13.16568 | 1.805184 | 96.02084 | 0.075039 | 1 |
| PTER     | 1 | 1458.14633  | 4.396834 | 0.603655 | 32.02514 | 0.207615 | 1 |
| PTF1A    | 1 | 516.7533606 | 12.45346 | 1.70771  | 90.81667 | 0.079157 | 1 |
| PTGES3L- | 1 | 3473.429019 | 1.830915 | 0.251469 | 13.33067 | 0.426696 | 1 |
| PTGS1    | 2 | 6229.841426 | 2.072082 | 0.499773 | 8.590955 | 0.26088  | 1 |
| PTK7     | 4 | 4530.554874 | 6.056787 | 2.154914 | 17.02373 | 0.005752 | 1 |
| PTPN12   | 1 | 413.066288  | 15.58593 | 2.136256 | 113.7136 | 0.063771 | 1 |
| PTPN13   | 1 | 10213.53793 | 0.605738 | 0.083211 | 4.409496 | 1        | 1 |
| PTPN14   | 1 | 2401.471972 | 2.659635 | 0.365245 | 19.36689 | 0.318759 | 1 |
| PTPN21   | 2 | 5761.890311 | 2.244641 | 0.541383 | 9.306554 | 0.233223 | 1 |
| PTPN6    | 1 | 915.7638113 | 7.016148 | 0.962891 | 51.12347 | 0.13593  | 1 |
| PTPRB    | 1 | 3021.005705 | 2.108951 | 0.289644 | 15.35566 | 0.383388 | 1 |
| PTPRF    | 1 | 3883.191349 | 1.635007 | 0.224568 | 11.90394 | 0.463405 | 1 |
| PTPRH    | 4 | 9489.691116 | 2.833558 | 1.008354 | 7.962535 | 0.063201 | 1 |
| PTPRJ    | 1 | 1824.632875 | 3.508558 | 0.481765 | 25.55182 | 0.252826 | 1 |
| PTPRO    | 1 | 5770.832797 | 1.091809 | 0.149972 | 7.948446 | 0.604913 | 1 |
| PTPRS    | 1 | 2985.980433 | 2.13399  | 0.293082 | 15.53803 | 0.379904 | 1 |

|         |   |             |          |          |          |          |   |
|---------|---|-------------|----------|----------|----------|----------|---|
| PTPRT   | 1 | 5829.565347 | 1.08055  | 0.148426 | 7.866472 | 0.608689 | 1 |
| PTPRU   | 1 | 1799.629316 | 3.557661 | 0.488504 | 25.90961 | 0.249828 | 1 |
| PTRH1   | 1 | 377.0330879 | 17.07794 | 2.340231 | 124.627  | 0.058387 | 1 |
| PUM1    | 1 | 645.9119306 | 9.958097 | 1.366039 | 72.59213 | 0.097899 | 1 |
| PUS7L   | 1 | 2329.884463 | 2.742142 | 0.376571 | 19.96794 | 0.310949 | 1 |
| PVRL1   | 1 | 885.0548897 | 7.260478 | 0.996386 | 52.90574 | 0.131644 | 1 |
| PWP2    | 1 | 904.3423317 | 7.105083 | 0.975083 | 51.77219 | 0.134274 | 1 |
| PXDN    | 1 | 2666.877537 | 2.392399 | 0.328559 | 17.42023 | 0.347258 | 1 |
| PXDNL   | 2 | 5289.926592 | 2.449602 | 0.590805 | 10.15656 | 0.205579 | 1 |
| PYGB    | 1 | 12500.78932 | 0.490216 | 0.067343 | 3.568483 | 0.722316 | 1 |
| PYGL    | 1 | 4555.619926 | 1.389889 | 0.190908 | 10.11894 | 0.518751 | 1 |
| PYHIN1  | 2 | 3511.558114 | 3.716815 | 0.896321 | 15.41268 | 0.107516 | 1 |
| PYROXD2 | 1 | 773.7078047 | 8.30905  | 1.140107 | 60.556   | 0.116128 | 1 |
| QRFPR   | 1 | 4656.830042 | 1.359124 | 0.186684 | 9.894917 | 0.526561 | 1 |
| QRICH2  | 2 | 9746.093011 | 1.305516 | 0.314907 | 5.41231  | 0.668151 | 1 |
| QSER1   | 1 | 8117.382979 | 0.768779 | 0.105606 | 5.596499 | 1        | 1 |
| QSOX2   | 1 | 3593.039624 | 1.769111 | 0.242983 | 12.88056 | 0.437687 | 1 |
| RAB3D   | 1 | 188.2154366 | 34.23624 | 4.679434 | 250.4834 | 0.029621 | 1 |
| RABL6   | 1 | 2204.928902 | 2.898995 | 0.398102 | 21.11062 | 0.296987 | 1 |
| RAD51B  | 2 | 5746.81432  | 2.250667 | 0.542836 | 9.331547 | 0.232339 | 1 |
| RAD54L  | 1 | 1771.625719 | 3.614301 | 0.496277 | 26.32233 | 0.246456 | 1 |
| RALBP1  | 1 | 128.6379179 | 50.10433 | 6.83206  | 367.4505 | 0.020468 | 1 |
| RANBP3L | 1 | 5864.054359 | 1.074044 | 0.147533 | 7.8191   | 0.61085  | 1 |
| RAPGEF1 | 1 | 477.2590198 | 13.48613 | 1.849032 | 98.36267 | 0.073268 | 1 |
| RAPGEF3 | 1 | 3375.96305  | 1.884515 | 0.258829 | 13.72103 | 0.41766  | 1 |
| RASEF   | 1 | 3474.829877 | 1.830166 | 0.251366 | 13.32522 | 0.426881 | 1 |
| RASSF6  | 2 | 3737.354615 | 3.48908  | 0.841422 | 14.46799 | 0.119101 | 1 |
| RBBP6   | 1 | 1243.361719 | 5.160794 | 0.708461 | 37.5939  | 0.179901 | 1 |
| RBFOX2  | 1 | 265.6859702 | 24.24593 | 3.318911 | 177.1259 | 0.041595 | 1 |
| RBL1    | 1 | 1119.748495 | 5.733345 | 0.786991 | 41.76823 | 0.163624 | 1 |
| RBL2    | 2 | 6260.238746 | 2.061766 | 0.497285 | 8.548172 | 0.262657 | 1 |
| RBM11   | 2 | 1284.910166 | 10.24897 | 2.469924 | 42.52818 | 0.017942 | 1 |
| RBM44   | 1 | 191.9813151 | 33.56417 | 4.588036 | 245.5415 | 0.030239 | 1 |
| RBM6    | 2 | 1357.548968 | 9.697758 | 2.337218 | 40.23866 | 0.019891 | 1 |
| RBMXL1  | 3 | 1713.742154 | 11.81777 | 3.640268 | 38.36524 | 0.002598 | 1 |
| RBPJ    | 1 | 32.56556818 | 197.9938 | 26.41065 | 1484.308 | 0.005393 | 1 |
| RCBTB1  | 1 | 305.9831868 | 21.04942 | 2.882737 | 153.7005 | 0.04768  | 1 |
| RCN3    | 1 | 1427.729186 | 4.491053 | 0.616582 | 32.71186 | 0.203804 | 1 |
| RDH13   | 1 | 1679.888577 | 3.813075 | 0.523555 | 27.7708  | 0.235272 | 1 |
| RECQL5  | 3 | 2460.070354 | 8.207937 | 2.529049 | 26.63857 | 0.007073 | 1 |
| REEP4   | 1 | 2178.068933 | 2.935062 | 0.403052 | 21.37337 | 0.293935 | 1 |
| RELN    | 2 | 18354.17952 | 0.668546 | 0.161272 | 2.77143  | 1        | 1 |
| REM2    | 1 | 1716.652464 | 3.730865 | 0.512274 | 27.17172 | 0.23979  | 1 |
| REP15   | 1 | 2950.421909 | 2.160018 | 0.296655 | 15.7276  | 0.376301 | 1 |
| RFX7    | 2 | 7192.17233  | 1.78779  | 0.431216 | 7.412051 | 0.317797 | 1 |
| RGAG1   | 1 | 7862.668386 | 0.794515 | 0.10914  | 5.783869 | 1        | 1 |
| RGL1    | 1 | 946.8110805 | 6.785238 | 0.931233 | 49.43922 | 0.140196 | 1 |
| RGL4    | 1 | 2595.335247 | 2.459054 | 0.337709 | 17.90576 | 0.33966  | 1 |
| RGMB    | 1 | 851.1050297 | 7.551115 | 1.036226 | 55.02595 | 0.12692  | 1 |
| RGP1    | 2 | 3341.869993 | 3.908214 | 0.942459 | 16.20668 | 0.098985 | 1 |
| RGPD2   | 1 | 11335.3463  | 0.543253 | 0.074628 | 3.954599 | 1        | 1 |
| RGS11   | 1 | 4358.402877 | 1.453941 | 0.199704 | 10.58537 | 0.503073 | 1 |
| RHAG    | 1 | 387.3197496 | 16.62369 | 2.278139 | 121.3039 | 0.059885 | 1 |
| RHD     | 3 | 3935.291102 | 5.100637 | 1.572011 | 16.54982 | 0.024637 | 1 |
| RHOBTB2 | 1 | 1176.386382 | 5.456074 | 0.748963 | 39.74663 | 0.171074 | 1 |
| RIC8B   | 1 | 1693.918206 | 3.781282 | 0.519192 | 27.53911 | 0.236985 | 1 |
| RIMS1   | 2 | 6397.07267  | 2.016539 | 0.486379 | 8.36062  | 0.270775 | 1 |
| RIMS2   | 2 | 3212.44281  | 4.067794 | 0.980926 | 16.86871 | 0.092602 | 1 |
| RIMS3   | 2 | 1254.068052 | 10.50232 | 2.530915 | 43.5806  | 0.01714  | 1 |
| RIN2    | 2 | 5823.450853 | 2.220356 | 0.535527 | 9.205844 | 0.236818 | 1 |
| RINT1   | 1 | 413.733615  | 15.56075 | 2.132812 | 113.5295 | 0.06392  | 1 |
| RIOK2   | 1 | 5885.349071 | 1.070066 | 0.146986 | 7.790129 | 0.612178 | 1 |
| RIPK1   | 1 | 508.0361019 | 12.66758 | 1.737017 | 92.38115 | 0.077835 | 1 |
| RNF133  | 1 | 2292.58433  | 2.787174 | 0.382752 | 20.29599 | 0.306844 | 1 |
| RNF135  | 2 | 1654.023901 | 7.950053 | 1.916352 | 32.98108 | 0.028641 | 1 |
| RNF168  | 1 | 225.2009791 | 28.60929 | 3.913634 | 209.1385 | 0.035319 | 1 |
| RNF17   | 1 | 1860.042908 | 3.441277 | 0.472532 | 25.06157 | 0.257004 | 1 |
| RNF215  | 1 | 1705.538795 | 3.755343 | 0.515633 | 27.3501  | 0.238449 | 1 |
| RNH1    | 1 | 1659.64333  | 3.859902 | 0.529981 | 28.11203 | 0.23282  | 1 |
| RNPEP   | 2 | 4919.414182 | 2.638061 | 0.636246 | 10.93816 | 0.184156 | 1 |
| ROS1    | 1 | 11600.64119 | 0.530243 | 0.072841 | 3.859885 | 1        | 1 |
| RP1L1   | 1 | 17987.97846 | 0.332855 | 0.045727 | 2.422932 | 0.364681 | 1 |
| RPGRIP1 | 1 | 3243.278853 | 1.96266  | 0.269558 | 14.29017 | 0.405043 | 1 |



|          |   |             |          |          |          |          |   |
|----------|---|-------------|----------|----------|----------|----------|---|
| RPL22L1  | 1 | 2578.731466 | 2.475052 | 0.339906 | 18.0223  | 0.33796  | 1 |
| RPL3L    | 3 | 16232.24523 | 1.175157 | 0.362296 | 3.811786 | 0.742535 | 1 |
| RPP40    | 3 | 11446.51822 | 1.700384 | 0.524199 | 5.515662 | 0.428864 | 1 |
| RPUSD1   | 2 | 4378.465052 | 2.97049  | 0.716397 | 12.31692 | 0.153645 | 1 |
| RREB1    | 7 | 13229.75416 | 3.820277 | 1.689664 | 8.637526 | 0.004489 | 1 |
| RRP12    | 1 | 3719.538656 | 1.708073 | 0.234601 | 12.43604 | 0.449094 | 1 |
| RRP15    | 2 | 8218.716565 | 1.557916 | 0.375779 | 6.458856 | 0.377573 | 1 |
| RRP7A    | 1 | 5635.459036 | 1.118652 | 0.153659 | 8.143899 | 0.596072 | 1 |
| RRP9     | 1 | 3034.780968 | 2.099262 | 0.288314 | 15.28509 | 0.384776 | 1 |
| RRS1     | 1 | 3562.495304 | 1.784499 | 0.245096 | 12.99263 | 0.434867 | 1 |
| RSL1D1   | 1 | 3180.540243 | 2.001881 | 0.274943 | 14.57583 | 0.399071 | 1 |
| RSRC2    | 1 | 99.29327911 | 64.91949 | 8.832633 | 477.1556 | 0.015781 | 1 |
| RTKN2    | 1 | 951.5042851 | 6.751644 | 0.926627 | 49.1942  | 0.140882 | 1 |
| RTL1     | 2 | 4852.230815 | 2.675316 | 0.645229 | 11.09267 | 0.180325 | 1 |
| RTN3     | 1 | 2109.368694 | 3.031489 | 0.416288 | 22.07588 | 0.286077 | 1 |
| RTP4     | 1 | 2629.657588 | 2.426623 | 0.333257 | 17.66953 | 0.343364 | 1 |
| RUSC2    | 1 | 1483.036469 | 4.32261  | 0.593472 | 31.48417 | 0.210778 | 1 |
| RYR3     | 1 | 4038.081503 | 1.571309 | 0.215822 | 11.44007 | 0.476677 | 1 |
| S100A3   | 1 | 2130.539199 | 3.001112 | 0.412118 | 21.85457 | 0.288591 | 1 |
| S1PR3    | 4 | 9688.048101 | 2.773268 | 0.986903 | 7.793083 | 0.067137 | 1 |
| S1PR4    | 1 | 3844.694524 | 1.651635 | 0.226852 | 12.02503 | 0.460102 | 1 |
| SAFB     | 1 | 544.4719571 | 11.81816 | 1.620748 | 86.17555 | 0.08311  | 1 |
| SAMD10   | 1 | 1895.770867 | 3.375939 | 0.463564 | 24.5855  | 0.261278 | 1 |
| SAMD11   | 1 | 9412.003785 | 0.659507 | 0.090597 | 4.800947 | 1        | 1 |
| SAMD3    | 2 | 995.4727071 | 13.2442  | 3.190777 | 54.97369 | 0.01108  | 1 |
| SAMD4A   | 1 | 615.8398396 | 10.44561 | 1.432811 | 76.15158 | 0.093573 | 1 |
| SAMD9L   | 1 | 9057.804573 | 0.686299 | 0.094277 | 4.996004 | 1        | 1 |
| SAMSN1   | 1 | 4314.654179 | 1.468944 | 0.201765 | 10.69462 | 0.499603 | 1 |
| SAPCD1   | 1 | 129.6985168 | 49.6944  | 6.776578 | 364.4219 | 0.020623 | 1 |
| SASH1    | 1 | 5361.34883  | 1.177156 | 0.161694 | 8.569892 | 0.57767  | 1 |
| SBDS     | 3 | 6520.382751 | 3.046276 | 0.939013 | 9.882499 | 0.084836 | 1 |
| SBNO2    | 1 | 1331.30477  | 4.81819  | 0.661463 | 35.09638 | 0.191357 | 1 |
| SCARF1   | 1 | 12805.59048 | 0.477937 | 0.065656 | 3.479097 | 0.722403 | 1 |
| SCEL     | 1 | 1462.58876  | 4.383401 | 0.601812 | 31.92724 | 0.208249 | 1 |
| SCLY     | 1 | 1252.096333 | 5.124614 | 0.703498 | 37.33014 | 0.18108  | 1 |
| SCML4    | 2 | 5837.099727 | 2.215041 | 0.534246 | 9.183802 | 0.237643 | 1 |
| SCN2A    | 1 | 1869.20745  | 3.424279 | 0.470199 | 24.93772 | 0.258075 | 1 |
| SCN7A    | 1 | 4762.885113 | 1.328289 | 0.182449 | 9.670386 | 0.534625 | 1 |
| SCNN1A   | 3 | 10462.74353 | 1.867888 | 0.57583  | 6.059091 | 0.231447 | 1 |
| SCNN1D   | 2 | 6261.613406 | 2.061301 | 0.497173 | 8.546247 | 0.262775 | 1 |
| SCRN2    | 1 | 1320.402209 | 4.858186 | 0.66695  | 35.38793 | 0.189934 | 1 |
| SCUBE2   | 1 | 3101.349039 | 2.053653 | 0.282052 | 14.9529  | 0.391279 | 1 |
| SDCBP2   | 2 | 7027.223215 | 1.83099  | 0.441634 | 7.591189 | 0.308068 | 1 |
| SDF2L1   | 1 | 3125.509141 | 2.03758  | 0.279845 | 14.83583 | 0.393724 | 1 |
| SDR39U1  | 1 | 14657.12454 | 0.414324 | 0.056918 | 3.015999 | 0.729476 | 1 |
| SEC14L3  | 2 | 10483.47318 | 1.209987 | 0.291867 | 5.016226 | 0.683129 | 1 |
| SEC14L4  | 1 | 9376.385903 | 0.66211  | 0.090954 | 4.819895 | 1        | 1 |
| SEC14L5  | 1 | 734.9914969 | 8.748087 | 1.200269 | 63.75988 | 0.110612 | 1 |
| SEC16B   | 2 | 7828.683991 | 1.638155 | 0.39513  | 6.791569 | 0.355066 | 1 |
| SEC63    | 1 | 269.2722931 | 23.92267 | 3.27482  | 174.7558 | 0.042053 | 1 |
| SEL1L    | 1 | 3575.097193 | 1.778118 | 0.244219 | 12.94616 | 0.436051 | 1 |
| SEMA3C   | 1 | 8572.503584 | 0.726603 | 0.099813 | 5.289433 | 1        | 1 |
| SEMA5B   | 1 | 3956.099976 | 1.604403 | 0.220366 | 11.68106 | 0.469696 | 1 |
| SEMA6A   | 2 | 2491.861468 | 5.259314 | 1.2681   | 21.81246 | 0.059822 | 1 |
| SENP6    | 1 | 2802.936554 | 2.275023 | 0.312445 | 16.56527 | 0.361376 | 1 |
| SEPT10   | 3 | 3628.882094 | 5.538161 | 1.706796 | 17.97007 | 0.019979 | 1 |
| SEPT14   | 1 | 4532.32313  | 1.397165 | 0.191908 | 10.17193 | 0.516876 | 1 |
| SERINC5  | 1 | 496.9113574 | 12.95175 | 1.775908 | 94.45757 | 0.076217 | 1 |
| SERPINA1 | 2 | 10424.00382 | 1.217191 | 0.293604 | 5.046092 | 0.68189  | 1 |
| SERPINA5 | 1 | 1098.624994 | 5.844074 | 0.802177 | 42.57562 | 0.160814 | 1 |
| SERPINB3 | 2 | 7601.008085 | 1.688799 | 0.407343 | 7.001571 | 0.341789 | 1 |
| SERPINB9 | 1 | 578.8096843 | 11.11553 | 1.524549 | 81.04358 | 0.088211 | 1 |
| SERTAD4  | 1 | 3012.807564 | 2.11476  | 0.290442 | 15.39797 | 0.382593 | 1 |
| SESN1    | 1 | 424.1421064 | 15.17826 | 2.080506 | 110.7325 | 0.06541  | 1 |
| SETD2    | 1 | 5674.761169 | 1.110727 | 0.15257  | 8.086193 | 0.598692 | 1 |
| SEZ6L2   | 1 | 6091.770974 | 1.032937 | 0.141887 | 7.51979  | 0.625039 | 1 |
| SFI1     | 1 | 15185.75288 | 0.399008 | 0.054814 | 2.904506 | 0.516135 | 1 |
| SFT2D2   | 1 | 335.8568651 | 19.17485 | 2.62675  | 139.9733 | 0.052218 | 1 |
| SGK2     | 2 | 878.8073543 | 15.00941 | 3.615399 | 62.3119  | 0.008751 | 1 |
| SH2D3A   | 1 | 1562.788825 | 4.10071  | 0.563025 | 29.86694 | 0.220816 | 1 |
| SH2D4A   | 1 | 9748.616373 | 0.635849 | 0.087347 | 4.628712 | 1        | 1 |
| SH2D5    | 1 | 2070.329971 | 3.089136 | 0.4242   | 22.49587 | 0.281598 | 1 |
| SH3BP2   | 2 | 4153.3307   | 3.13436  | 0.755905 | 12.99662 | 0.14129  | 1 |

|          |   |             |          |          |          |          |   |
|----------|---|-------------|----------|----------|----------|----------|---|
| SH3GL1   | 1 | 2966.246361 | 2.148358 | 0.295054 | 15.64268 | 0.377905 | 1 |
| SH3PXD2/ | 1 | 6687.82499  | 0.938591 | 0.128929 | 6.832854 | 1        | 1 |
| SH3PXD2E | 1 | 1183.721578 | 5.422106 | 0.744304 | 39.49897 | 0.172133 | 1 |
| SH3TC1   | 2 | 7767.929416 | 1.651379 | 0.398319 | 6.846403 | 0.351522 | 1 |
| SHANK2   | 2 | 7845.818192 | 1.634462 | 0.394239 | 6.776258 | 0.356053 | 1 |
| SHBG     | 1 | 296.1890725 | 21.74631 | 2.977866 | 158.8057 | 0.046162 | 1 |
| SHCBP1L  | 2 | 5352.576393 | 2.420314 | 0.583743 | 10.0351  | 0.209247 | 1 |
| SHROOM:  | 1 | 645.8562997 | 9.958957 | 1.366157 | 72.59841 | 0.097899 | 1 |
| SIDT1    | 3 | 12318.6243  | 1.574263 | 0.485323 | 5.106505 | 0.446106 | 1 |
| SIGIRR   | 2 | 7796.258629 | 1.645187 | 0.396826 | 6.820728 | 0.353149 | 1 |
| SIGLEC12 | 4 | 14685.09095 | 1.791771 | 0.637666 | 5.034679 | 0.293814 | 1 |
| SIGLEC6  | 1 | 4355.4409   | 1.454947 | 0.199843 | 10.5927  | 0.502832 | 1 |
| SIK3     | 1 | 1832.516067 | 3.493354 | 0.479679 | 25.44103 | 0.253783 | 1 |
| SIL1     | 1 | 3213.989425 | 1.98078  | 0.272046 | 14.42214 | 0.402257 | 1 |
| SIM1     | 1 | 511.2447935 | 12.58792 | 1.726114 | 91.79907 | 0.078276 | 1 |
| SIMC1    | 1 | 2134.728424 | 2.995172 | 0.411303 | 21.81129 | 0.289048 | 1 |
| SIN3B    | 1 | 652.5108008 | 9.857131 | 1.352209 | 71.85503 | 0.098905 | 1 |
| SIRT2    | 1 | 2979.511583 | 2.138679 | 0.293725 | 15.57218 | 0.379305 | 1 |
| SIRT3    | 1 | 701.1520789 | 9.17153  | 1.258287 | 66.85036 | 0.105776 | 1 |
| SKIV2L   | 1 | 6141.593999 | 1.024349 | 0.140707 | 7.457263 | 1        | 1 |
| SLC10A2  | 1 | 5480.52189  | 1.151002 | 0.158102 | 8.379449 | 0.585828 | 1 |
| SLC12A1  | 2 | 1864.596311 | 7.046295 | 1.698658 | 29.22911 | 0.035655 | 1 |
| SLC12A3  | 1 | 10062.70386 | 0.615202 | 0.084511 | 4.478396 | 1        | 1 |
| SLC12A8  | 1 | 2303.06414  | 2.774375 | 0.380995 | 20.20275 | 0.307956 | 1 |
| SLC12A9  | 1 | 1118.34688  | 5.740562 | 0.787981 | 41.82086 | 0.163357 | 1 |
| SLC13A2  | 2 | 1496.385064 | 8.793107 | 2.119387 | 36.48165 | 0.023805 | 1 |
| SLC13A3  | 1 | 6356.614393 | 0.988832 | 0.135829 | 7.198659 | 1        | 1 |
| SLC14A2  | 2 | 11889.36028 | 1.060686 | 0.255857 | 4.397202 | 0.713949 | 1 |
| SLC17A2  | 1 | 886.3226383 | 7.250056 | 0.994958 | 52.82971 | 0.131783 | 1 |
| SLC18A3  | 1 | 631.7435413 | 10.18201 | 1.396708 | 74.22687 | 0.095883 | 1 |
| SLC1A7   | 1 | 3350.369001 | 1.899107 | 0.260832 | 13.82731 | 0.415214 | 1 |
| SLC22A1  | 3 | 21787.985   | 0.854828 | 0.263546 | 2.772682 | 1        | 1 |
| SLC22A10 | 1 | 10444.89221 | 0.591753 | 0.08129  | 4.307683 | 1        | 1 |
| SLC22A11 | 2 | 1722.509091 | 7.631874 | 1.839715 | 31.66007 | 0.030867 | 1 |
| SLC22A16 | 3 | 5543.224322 | 3.597566 | 1.108899 | 11.67147 | 0.05788  | 1 |
| SLC22A18 | 1 | 2580.734194 | 2.473111 | 0.339639 | 18.00816 | 0.338173 | 1 |
| SLC22A24 | 2 | 6582.075466 | 1.95838  | 0.472354 | 8.119446 | 0.281739 | 1 |
| SLC23A3  | 1 | 793.0239323 | 8.106037 | 1.112285 | 59.07465 | 0.118803 | 1 |
| SLC25A18 | 1 | 426.0098314 | 15.1116  | 2.07139  | 110.2451 | 0.065708 | 1 |
| SLC25A25 | 1 | 954.7015538 | 6.728947 | 0.923515 | 49.02866 | 0.141293 | 1 |
| SLC25A32 | 1 | 1899.291832 | 3.369633 | 0.462699 | 24.53955 | 0.261633 | 1 |
| SLC25A34 | 1 | 1862.87928  | 3.435998 | 0.471807 | 25.02311 | 0.257361 | 1 |
| SLC25A45 | 3 | 8116.630813 | 2.431238 | 0.749465 | 7.886851 | 0.138153 | 1 |
| SLC25A47 | 1 | 3016.030649 | 2.112472 | 0.290127 | 15.38131 | 0.382891 | 1 |
| SLC25A48 | 1 | 88.32872501 | 72.98136 | 9.917549 | 537.056  | 0.014057 | 1 |
| SLC26A1  | 5 | 11536.15034 | 2.971527 | 1.163963 | 7.586128 | 0.035191 | 1 |
| SLC26A11 | 1 | 7158.673354 | 0.87517  | 0.120218 | 6.371097 | 1        | 1 |
| SLC26A2  | 2 | 5215.202357 | 2.485454 | 0.59945  | 10.30525 | 0.201222 | 1 |
| SLC26A5  | 1 | 1225.957406 | 5.234424 | 0.71856  | 38.13067 | 0.17767  | 1 |
| SLC26A6  | 1 | 2953.929516 | 2.157422 | 0.296299 | 15.7087  | 0.376703 | 1 |
| SLC27A5  | 1 | 1992.91628  | 3.210127 | 0.440807 | 23.37739 | 0.272674 | 1 |
| SLC28A2  | 1 | 7026.891145 | 0.892064 | 0.122539 | 6.494098 | 1        | 1 |
| SLC2A11  | 1 | 12334.31994 | 0.497178 | 0.068299 | 3.619168 | 0.722415 | 1 |
| SLC2A4   | 1 | 544.1247518 | 11.82571 | 1.621782 | 86.23075 | 0.08311  | 1 |
| SLC2A9   | 3 | 5746.326139 | 3.467546 | 1.068834 | 11.24953 | 0.063085 | 1 |
| SLC35D2  | 1 | 417.146378  | 15.43324 | 2.115375 | 112.597  | 0.064367 | 1 |
| SLC35E2  | 1 | 3325.056477 | 1.913759 | 0.262844 | 13.93402 | 0.412853 | 1 |
| SLC36A4  | 1 | 1309.529298 | 4.898736 | 0.672512 | 35.68352 | 0.188638 | 1 |
| SLC38A6  | 1 | 3378.456394 | 1.883105 | 0.258635 | 13.71077 | 0.417847 | 1 |
| SLC39A12 | 2 | 6692.350603 | 1.925243 | 0.464363 | 7.982033 | 0.288255 | 1 |
| SLC39A13 | 1 | 799.4817435 | 8.040354 | 1.103283 | 58.59539 | 0.119646 | 1 |
| SLC39A2  | 1 | 4864.294186 | 1.300063 | 0.178573 | 9.46485  | 0.542184 | 1 |
| SLC39A5  | 1 | 5398.632961 | 1.168849 | 0.160553 | 8.509406 | 0.58027  | 1 |
| SLC44A5  | 1 | 1313.206235 | 4.884947 | 0.670621 | 35.58301 | 0.189027 | 1 |
| SLC4A1AP | 1 | 611.0704695 | 10.52734 | 1.444004 | 76.74833 | 0.092851 | 1 |
| SLC4A5   | 1 | 1518.280962 | 4.221673 | 0.579622 | 30.74851 | 0.215185 | 1 |
| SLC5A3   | 1 | 1760.605771 | 3.637084 | 0.499404 | 26.48835 | 0.245127 | 1 |
| SLC5A4   | 1 | 9922.464673 | 0.62426  | 0.085755 | 4.544336 | 1        | 1 |
| SLC6A20  | 1 | 1311.848896 | 4.890028 | 0.671318 | 35.62005 | 0.188897 | 1 |
| SLC6A7   | 1 | 1035.816528 | 6.199994 | 0.850987 | 45.171   | 0.152327 | 1 |
| SLC7A13  | 1 | 10532.03959 | 0.586644 | 0.080588 | 4.270491 | 1        | 1 |
| SLC7A4   | 1 | 3906.584863 | 1.625063 | 0.223203 | 11.83152 | 0.465482 | 1 |
| SLC8A3   | 1 | 1854.2173   | 3.452169 | 0.474026 | 25.14094 | 0.25629  | 1 |

|          |   |             |          |          |          |          |             |
|----------|---|-------------|----------|----------|----------|----------|-------------|
| SLC9A3R1 | 5 | 2090.603521 | 17.04261 | 6.67033  | 43.54366 | 2.06E-05 | 0.048248115 |
| SLC9C1   | 1 | 2432.279928 | 2.625623 | 0.360576 | 19.11912 | 0.322141 | 1           |
| SLCO1B7  | 1 | 3784.184775 | 1.678455 | 0.230534 | 12.22035 | 0.454757 | 1           |
| SLCO2B1  | 1 | 6207.076141 | 1.013273 | 0.139186 | 7.37661  | 1        | 1           |
| SLK      | 1 | 1700.545634 | 3.766445 | 0.517156 | 27.431   | 0.237839 | 1           |
| SMAD9    | 1 | 794.5737915 | 8.090176 | 1.110111 | 58.95892 | 0.119084 | 1           |
| SMCO3    | 1 | 8334.923991 | 0.748045 | 0.102758 | 5.445542 | 1        | 1           |
| SMG7     | 1 | 2369.107417 | 2.696319 | 0.370281 | 19.63412 | 0.315249 | 1           |
| SMOX     | 1 | 604.4831127 | 10.64234 | 1.459753 | 77.58807 | 0.091838 | 1           |
| SMTNL2   | 1 | 1535.848325 | 4.173091 | 0.572956 | 30.39445 | 0.217442 | 1           |
| SMUG1    | 1 | 509.5998964 | 12.62863 | 1.731686 | 92.09655 | 0.078129 | 1           |
| SMYD1    | 2 | 3807.534325 | 3.4238   | 0.825684 | 14.1972  | 0.122821 | 1           |
| SNAI3    | 1 | 1999.555038 | 3.199384 | 0.439333 | 23.29911 | 0.273489 | 1           |
| SNAP91   | 1 | 546.1935931 | 11.78082 | 1.615637 | 85.90285 | 0.083403 | 1           |
| SNAPC1   | 1 | 505.5601036 | 12.72975 | 1.745525 | 92.83537 | 0.077541 | 1           |
| SNAPC4   | 1 | 7641.140994 | 0.818293 | 0.112406 | 5.956984 | 1        | 1           |
| SNCAIP   | 1 | 6032.439892 | 1.043349 | 0.143317 | 7.595598 | 0.621354 | 1           |
| SNRK     | 1 | 2571.492136 | 2.482092 | 0.340872 | 18.07358 | 0.337109 | 1           |
| SNX17    | 2 | 1541.692976 | 8.533145 | 2.056783 | 35.40216 | 0.025175 | 1           |
| SNX4     | 1 | 195.7867287 | 32.9113  | 4.499232 | 240.7419 | 0.030856 | 1           |
| SOGA2    | 1 | 3785.698678 | 1.677774 | 0.230441 | 12.21539 | 0.454933 | 1           |
| SORBS2   | 1 | 4580.492657 | 1.382202 | 0.189853 | 10.06297 | 0.520618 | 1           |
| SORL1    | 2 | 6565.240249 | 1.963537 | 0.473598 | 8.14083  | 0.280731 | 1           |
| SOX4     | 1 | 3756.214074 | 1.691145 | 0.232277 | 12.31276 | 0.452287 | 1           |
| SOX9     | 1 | 124.4952708 | 51.77243 | 7.057757 | 379.7786 | 0.019688 | 1           |
| SP3      | 1 | 262.5411334 | 24.53666 | 3.358563 | 179.2576 | 0.041137 | 1           |
| SPAG16   | 2 | 9665.812452 | 1.316796 | 0.317627 | 5.459081 | 0.666601 | 1           |
| SPAG17   | 1 | 4033.889342 | 1.572969 | 0.216049 | 11.45215 | 0.476339 | 1           |
| SPATA17  | 1 | 5147.749032 | 1.227065 | 0.168548 | 8.933302 | 0.562803 | 1           |
| SPATA18  | 1 | 2815.485412 | 2.264769 | 0.311037 | 16.49058 | 0.362607 | 1           |
| SPATA5L1 | 1 | 6626.275888 | 0.947547 | 0.130159 | 6.898065 | 1        | 1           |
| SPATA6   | 3 | 4403.213504 | 4.549984 | 1.402362 | 14.76249 | 0.032806 | 1           |
| SPATC1   | 1 | 2511.382389 | 2.542114 | 0.349112 | 18.5108  | 0.330688 | 1           |
| SPDL1    | 1 | 6835.951532 | 0.917697 | 0.126059 | 6.680728 | 1        | 1           |
| SPDYE1   | 1 | 1942.328265 | 3.294403 | 0.452374 | 23.99142 | 0.266704 | 1           |
| SPECC1   | 4 | 5484.659286 | 4.983827 | 1.773298 | 14.00697 | 0.011081 | 1           |
| SPECC1L  | 1 | 4377.770528 | 1.447395 | 0.198805 | 10.5377  | 0.504679 | 1           |
| SPHKAP   | 1 | 2933.32171  | 2.172759 | 0.298405 | 15.82041 | 0.374593 | 1           |
| SPIB     | 1 | 150.9682553 | 42.6894  | 5.827442 | 312.7247 | 0.023891 | 1           |
| SPICE1   | 3 | 6617.815108 | 3.000233 | 0.924824 | 9.733093 | 0.087796 | 1           |
| SPINK5   | 3 | 5223.87702  | 3.82245  | 1.178196 | 12.40127 | 0.050143 | 1           |
| SPRN     | 1 | 352.3399531 | 18.27661 | 2.504038 | 133.3984 | 0.05463  | 1           |
| SPRY1    | 1 | 196.057268  | 32.86585 | 4.493049 | 240.4078 | 0.030856 | 1           |
| SPSB3    | 2 | 1399.346985 | 9.406517 | 2.267094 | 39.02907 | 0.021023 | 1           |
| SPTA1    | 2 | 17899.39947 | 0.68687  | 0.165692 | 2.847394 | 1        | 1           |
| SPTBN5   | 5 | 13820.38057 | 2.456782 | 0.962363 | 6.271832 | 0.066784 | 1           |
| SRFBP1   | 1 | 2235.759243 | 2.858666 | 0.392566 | 20.81681 | 0.300475 | 1           |
| SRGAP1   | 1 | 1040.10205  | 6.174342 | 0.847469 | 44.98394 | 0.152868 | 1           |
| SRP68    | 3 | 1399.426993 | 14.49029 | 4.462538 | 47.05135 | 0.001464 | 1           |
| SRRM1    | 3 | 2997.068029 | 6.722758 | 2.071678 | 21.81588 | 0.012057 | 1           |
| SSFA2    | 2 | 18113.36284 | 0.678135 | 0.163585 | 2.81118  | 1        | 1           |
| SSH1     | 1 | 1597.184429 | 4.011848 | 0.550831 | 29.21934 | 0.225044 | 1           |
| SSUH2    | 2 | 4544.675907 | 2.859926 | 0.68974  | 11.85835 | 0.162953 | 1           |
| SSX7     | 2 | 6322.592517 | 2.040913 | 0.492257 | 8.461699 | 0.266389 | 1           |
| ST7L     | 1 | 3977.71147  | 1.595546 | 0.21915  | 11.61657 | 0.471578 | 1           |
| STAB2    | 2 | 6366.261427 | 2.026553 | 0.488794 | 8.402148 | 0.268938 | 1           |
| STAM     | 1 | 592.2231706 | 10.86319 | 1.489996 | 79.20076 | 0.090099 | 1           |
| STARD13  | 1 | 2741.315336 | 2.326739 | 0.319545 | 16.94197 | 0.354977 | 1           |
| STARD3   | 1 | 368.1135157 | 17.49237 | 2.396872 | 127.6592 | 0.057036 | 1           |
| STPG2    | 1 | 1659.529194 | 3.860169 | 0.530018 | 28.11398 | 0.23282  | 1           |
| STRA6    | 1 | 853.8603796 | 7.526666 | 1.032875 | 54.84758 | 0.127338 | 1           |
| STX2     | 2 | 3993.618263 | 3.261814 | 0.786633 | 13.52528 | 0.132701 | 1           |
| STX4     | 1 | 344.4463815 | 18.69604 | 2.561342 | 136.4683 | 0.053425 | 1           |
| STXBP5L  | 1 | 2855.808638 | 2.232429 | 0.306597 | 16.25502 | 0.366797 | 1           |
| STYXL1   | 1 | 1517.251587 | 4.224554 | 0.580018 | 30.76952 | 0.215059 | 1           |
| SULT1A1  | 1 | 1207.264138 | 5.315871 | 0.729732 | 38.72445 | 0.17517  | 1           |
| SULT1A2  | 1 | 3107.592329 | 2.049475 | 0.281478 | 14.92247 | 0.391965 | 1           |
| SULT2B1  | 2 | 4506.062795 | 2.884884 | 0.695758 | 11.96186 | 0.16077  | 1           |
| SULT6B1  | 4 | 8211.077583 | 3.292096 | 1.171494 | 9.251348 | 0.040889 | 1           |
| SUMF2    | 1 | 4687.431268 | 1.350084 | 0.185442 | 9.829088 | 0.528857 | 1           |
| SUN1     | 2 | 4091.896869 | 3.182208 | 0.767441 | 13.19509 | 0.13798  | 1           |
| SURF2    | 1 | 204.8939245 | 31.4473  | 4.300035 | 229.9826 | 0.032243 | 1           |
| SURF6    | 1 | 4813.480772 | 1.314058 | 0.180495 | 9.566756 | 0.538382 | 1           |

|          |    |             |          |          |          |          |             |
|----------|----|-------------|----------|----------|----------|----------|-------------|
| SUSD1    | 1  | 1460.918484 | 4.388442 | 0.602504 | 31.96398 | 0.207995 | 1           |
| SUV420H1 | 1  | 199.7752314 | 32.25371 | 4.409769 | 235.9085 | 0.031473 | 1           |
| SUZ12    | 1  | 1229.176155 | 5.22065  | 0.716671 | 38.03025 | 0.178064 | 1           |
| SV2C     | 1  | 823.0811498 | 7.809085 | 1.071586 | 56.90801 | 0.12301  | 1           |
| SVEP1    | 2  | 13889.83768 | 0.900341 | 0.217182 | 3.732411 | 1        | 1           |
| SVIL     | 2  | 4237.659066 | 3.07094  | 0.740615 | 12.73356 | 0.145931 | 1           |
| SYBU     | 1  | 3095.762503 | 2.057405 | 0.282567 | 14.98023 | 0.390788 | 1           |
| SYCP1    | 1  | 2812.795398 | 2.266959 | 0.311338 | 16.50654 | 0.362402 | 1           |
| SYCP2    | 5  | 6212.336567 | 5.640474 | 2.209068 | 14.40198 | 0.00295  | 1           |
| SYDE2    | 1  | 2241.139955 | 2.851741 | 0.391615 | 20.76636 | 0.301036 | 1           |
| SYNE1    | 13 | 33687.02418 | 3.113097 | 1.606186 | 6.033782 | 0.001555 | 1           |
| SYNE2    | 3  | 20337.89299 | 0.921558 | 0.284118 | 2.989142 | 1        | 1           |
| SYNJ2    | 1  | 5918.813815 | 1.06387  | 0.146135 | 7.745021 | 0.614319 | 1           |
| SYNM     | 1  | 3018.543818 | 2.110692 | 0.289883 | 15.36834 | 0.383189 | 1           |
| SYPL2    | 1  | 3068.275965 | 2.076065 | 0.285129 | 15.11614 | 0.388036 | 1           |
| SYT5     | 1  | 490.6046551 | 13.11858 | 1.798737 | 95.67661 | 0.075333 | 1           |
| SYT8     | 1  | 3847.169298 | 1.650556 | 0.226704 | 12.01718 | 0.460276 | 1           |
| SYTL4    | 2  | 1581.608799 | 8.316462 | 2.004599 | 34.50242 | 0.026392 | 1           |
| SYTL5    | 3  | 604.1433743 | 33.67178 | 10.35393 | 109.5032 | 0.000129 | 0.302087682 |
| SZT2     | 4  | 4614.766914 | 5.944233 | 2.114885 | 16.70725 | 0.006131 | 1           |
| TAAR2    | 1  | 2258.650613 | 2.829433 | 0.388553 | 20.60385 | 0.303052 | 1           |
| TACC2    | 3  | 15349.93547 | 1.247365 | 0.384555 | 4.046027 | 0.734571 | 1           |
| TACR3    | 1  | 757.3521672 | 8.489044 | 1.164773 | 61.86946 | 0.113727 | 1           |
| TADA1    | 1  | 5701.697077 | 1.105358 | 0.151833 | 8.047104 | 0.600451 | 1           |
| TAF1B    | 1  | 1164.793317 | 5.510633 | 0.756446 | 40.14441 | 0.169615 | 1           |
| TAF1C    | 1  | 7977.311274 | 0.782729 | 0.107522 | 5.698056 | 1        | 1           |
| TAF1L    | 2  | 7475.696571 | 1.71799  | 0.414383 | 7.122614 | 0.334479 | 1           |
| TAF4     | 1  | 559.4525301 | 11.50101 | 1.577329 | 83.85902 | 0.0853   | 1           |
| TAF8     | 1  | 1535.971822 | 4.172753 | 0.57291  | 30.39199 | 0.217442 | 1           |
| TAPBP    | 1  | 1834.27877  | 3.489973 | 0.479215 | 25.41639 | 0.253903 | 1           |
| TAPT1    | 1  | 618.0119754 | 10.40881 | 1.427771 | 75.88285 | 0.093862 | 1           |
| TARS     | 1  | 6148.037976 | 1.023249 | 0.140556 | 7.44925  | 1        | 1           |
| TAS2R19  | 1  | 2950.251425 | 2.160144 | 0.296673 | 15.72852 | 0.376301 | 1           |
| TAS2R31  | 1  | 4665.204251 | 1.356638 | 0.186342 | 9.876817 | 0.527174 | 1           |
| TAS2R46  | 1  | 205.8486259 | 31.30134 | 4.280169 | 228.9101 | 0.032397 | 1           |
| TAS2R9   | 1  | 2320.032339 | 2.753896 | 0.378184 | 20.05356 | 0.309842 | 1           |
| TBC1D7   | 1  | 2645.29707  | 2.412125 | 0.331267 | 17.56392 | 0.344945 | 1           |
| TBC1D8B  | 1  | 1019.773578 | 6.297935 | 0.864417 | 45.88524 | 0.150159 | 1           |
| TBCE     | 1  | 1628.306048 | 3.93468  | 0.540242 | 28.65698 | 0.22888  | 1           |
| TBCK     | 1  | 2005.538781 | 3.189762 | 0.438012 | 23.22901 | 0.274188 | 1           |
| TBXAS1   | 3  | 9111.096555 | 2.157021 | 0.664948 | 6.997148 | 0.17597  | 1           |
| TCEANC2  | 1  | 575.4395272 | 11.18078 | 1.533484 | 81.52012 | 0.08763  | 1           |
| TCEB3    | 2  | 840.7280432 | 15.69162 | 3.779463 | 65.14863 | 0.008043 | 1           |
| TCERG1L  | 1  | 2182.492846 | 2.929061 | 0.402229 | 21.32965 | 0.294388 | 1           |
| TCF3     | 4  | 9413.870522 | 2.857275 | 1.016792 | 8.029194 | 0.061724 | 1           |
| TCHH     | 1  | 2380.732702 | 2.683027 | 0.368456 | 19.5373  | 0.316567 | 1           |
| TCP11    | 2  | 3997.188792 | 3.258854 | 0.785919 | 13.513   | 0.132862 | 1           |
| TCTN1    | 1  | 5885.458152 | 1.070045 | 0.146983 | 7.789981 | 0.612178 | 1           |
| TDO2     | 3  | 8525.50809  | 2.310749 | 0.712329 | 7.495916 | 0.153347 | 1           |
| TDRD10   | 1  | 171.394612  | 37.59874 | 5.136436 | 275.2229 | 0.026992 | 1           |
| TDRD12   | 1  | 8082.579741 | 0.7722   | 0.106075 | 5.621404 | 1        | 1           |
| TDRD5    | 1  | 1470.542261 | 4.359555 | 0.598541 | 31.75343 | 0.209261 | 1           |
| TECPR2   | 2  | 6664.278302 | 1.933575 | 0.466372 | 8.016582 | 0.286597 | 1           |
| TEKT4    | 2  | 9628.1868   | 1.322148 | 0.318918 | 5.48127  | 0.66587  | 1           |
| TEKT5    | 1  | 11249.32954 | 0.547603 | 0.075226 | 3.986267 | 1        | 1           |
| TENM1    | 2  | 1788.477073 | 7.348431 | 1.77144  | 30.48336 | 0.033025 | 1           |
| TENM2    | 1  | 4462.317093 | 1.419486 | 0.194973 | 10.33447 | 0.511369 | 1           |
| TEP1     | 3  | 11733.23632 | 1.656851 | 0.51078  | 5.374434 | 0.434134 | 1           |
| TESK1    | 1  | 679.2779326 | 9.467698 | 1.298862 | 69.01217 | 0.102633 | 1           |
| TET2     | 2  | 19727.12009 | 0.618355 | 0.149165 | 2.56335  | 0.767843 | 1           |
| TEX15    | 1  | 4019.678047 | 1.578621 | 0.216826 | 11.49331 | 0.475153 | 1           |
| TEX19    | 2  | 1228.862917 | 10.71882 | 2.58303  | 44.47994 | 0.016505 | 1           |
| TFDP3    | 1  | 7456.166891 | 0.839229 | 0.115282 | 6.109416 | 1        | 1           |
| TFEC     | 2  | 5653.565609 | 2.288658 | 0.551997 | 9.489095 | 0.226868 | 1           |
| TFR2     | 1  | 6122.760596 | 1.027579 | 0.141151 | 7.480779 | 0.626928 | 1           |
| TG       | 1  | 11766.21303 | 0.522421 | 0.071767 | 3.802939 | 1        | 1           |
| TGDS     | 1  | 401.2306624 | 16.04645 | 2.199223 | 117.0816 | 0.061979 | 1           |
| TGFBR2   | 1  | 672.3870478 | 9.564989 | 1.31219  | 69.72236 | 0.101631 | 1           |
| TGM1     | 1  | 5788.999925 | 1.088302 | 0.149491 | 7.922912 | 0.606069 | 1           |
| TGM6     | 1  | 9161.190172 | 0.678265 | 0.093173 | 4.937511 | 1        | 1           |
| TGS1     | 1  | 3442.823591 | 1.847419 | 0.253735 | 13.45087 | 0.423916 | 1           |
| THAP3    | 1  | 1370.886264 | 4.678334 | 0.642276 | 34.07694 | 0.196513 | 1           |
| THBS2    | 1  | 3746.04553  | 1.695805 | 0.232917 | 12.3467  | 0.451402 | 1           |

|          |   |             |          |          |          |          |   |
|----------|---|-------------|----------|----------|----------|----------|---|
| THBS3    | 1 | 3454.387201 | 1.841149 | 0.252874 | 13.4052  | 0.424937 | 1 |
| THBS4    | 2 | 1850.434473 | 7.100624 | 1.711746 | 29.45464 | 0.035136 | 1 |
| THEG     | 2 | 6787.247913 | 1.897589 | 0.457694 | 7.867357 | 0.29388  | 1 |
| THSD1    | 1 | 4608.441686 | 1.373664 | 0.18868  | 10.0008  | 0.522787 | 1 |
| THSD7A   | 1 | 2206.433389 | 2.897001 | 0.397828 | 21.09609 | 0.297099 | 1 |
| THUMPDE  | 1 | 786.3523169 | 8.175028 | 1.12174  | 59.57806 | 0.117818 | 1 |
| TIAM1    | 2 | 4264.260628 | 3.051454 | 0.735917 | 12.65274 | 0.147357 | 1 |
| TIAM2    | 1 | 8362.676371 | 0.745478 | 0.102405 | 5.426849 | 1        | 1 |
| TIMM44   | 2 | 1063.39137  | 12.39493 | 2.986431 | 51.44412 | 0.012558 | 1 |
| TJP1     | 3 | 16946.80238 | 1.122188 | 0.345967 | 3.639959 | 0.750007 | 1 |
| TJP3     | 4 | 6610.159127 | 4.116321 | 1.464714 | 11.56819 | 0.020573 | 1 |
| TLDC2    | 1 | 5595.969298 | 1.126727 | 0.154768 | 8.202696 | 0.593501 | 1 |
| TLE2     | 2 | 4218.032809 | 3.085474 | 0.744119 | 12.79385 | 0.144836 | 1 |
| TLL2     | 1 | 6546.46443  | 0.959412 | 0.131789 | 6.984451 | 1        | 1 |
| TLN1     | 1 | 1085.518866 | 5.914942 | 0.811896 | 43.09237 | 0.159069 | 1 |
| TLN2     | 1 | 5321.989188 | 1.186052 | 0.162915 | 8.634664 | 0.574985 | 1 |
| TLR2     | 2 | 13267.36167 | 0.945052 | 0.227967 | 3.917783 | 1        | 1 |
| TLR5     | 1 | 1448.797024 | 4.425373 | 0.607571 | 32.23315 | 0.206474 | 1 |
| TM4SF19  | 1 | 806.7359545 | 7.967824 | 1.093342 | 58.06619 | 0.120769 | 1 |
| TM6SF2   | 1 | 4146.482504 | 1.52956  | 0.210089 | 11.13604 | 0.485735 | 1 |
| TMC1     | 1 | 2304.251631 | 2.772932 | 0.380797 | 20.19223 | 0.308067 | 1 |
| TMC8     | 3 | 7572.553891 | 2.611745 | 0.805097 | 8.47253  | 0.118844 | 1 |
| TMCO2    | 3 | 4252.83602  | 4.713735 | 1.452813 | 15.29398 | 0.030051 | 1 |
| TMCO4    | 1 | 3815.311195 | 1.664553 | 0.228625 | 12.11911 | 0.45748  | 1 |
| TMEM102  | 1 | 860.0182441 | 7.47259  | 1.025463 | 54.45309 | 0.128173 | 1 |
| TMEM131  | 2 | 1573.389862 | 8.360179 | 2.015128 | 34.68395 | 0.026116 | 1 |
| TMEM132  | 2 | 9159.091964 | 1.392559 | 0.335899 | 5.773217 | 0.6572   | 1 |
| TMEM136  | 1 | 358.3478531 | 17.96977 | 2.462111 | 131.1527 | 0.055533 | 1 |
| TMEM14B  | 1 | 1431.162602 | 4.480217 | 0.615096 | 32.63289 | 0.204186 | 1 |
| TMEM168  | 1 | 308.0160617 | 20.91033 | 2.863748 | 152.6817 | 0.047983 | 1 |
| TMEM175  | 1 | 11033.65486 | 0.558809 | 0.076765 | 4.067842 | 1        | 1 |
| TMEM189  | 1 | 113.3498382 | 56.86562 | 7.746175 | 417.4575 | 0.017971 | 1 |
| TMEM198  | 1 | 306.5392495 | 21.01119 | 2.877518 | 153.4205 | 0.047831 | 1 |
| TMEM200  | 1 | 388.6213823 | 16.56793 | 2.270516 | 120.8959 | 0.060185 | 1 |
| TMEM222  | 2 | 2743.366791 | 4.772327 | 1.150737 | 19.79175 | 0.07071  | 1 |
| TMEM223  | 1 | 4521.688702 | 1.400511 | 0.192367 | 10.19629 | 0.516093 | 1 |
| TMEM245  | 1 | 889.9190185 | 7.220654 | 0.990927 | 52.61523 | 0.132337 | 1 |
| TMEM25   | 1 | 1531.042717 | 4.18627  | 0.574764 | 30.4905  | 0.216816 | 1 |
| TMEM255  | 1 | 9766.059316 | 0.634668 | 0.087185 | 4.620111 | 1        | 1 |
| TMEM259  | 1 | 1447.226846 | 4.430202 | 0.608234 | 32.26834 | 0.20622  | 1 |
| TMEM68   | 1 | 674.5135798 | 9.534753 | 1.308048 | 69.50164 | 0.102061 | 1 |
| TMEM70   | 1 | 132.2110272 | 48.74953 | 6.64867  | 357.4424 | 0.020935 | 1 |
| TMEM74B  | 1 | 330.6789271 | 19.4755  | 2.667815 | 142.1744 | 0.051463 | 1 |
| TMPRSS11 | 1 | 1056.52865  | 6.077947 | 0.83425  | 44.281   | 0.155165 | 1 |
| TMPRSS11 | 1 | 281.0873463 | 22.91604 | 3.137494 | 167.3771 | 0.043881 | 1 |
| TMPRSS13 | 1 | 616.7808622 | 10.42964 | 1.430623 | 76.03492 | 0.093718 | 1 |
| TMPRSS15 | 3 | 8410.854804 | 2.343354 | 0.722378 | 7.601703 | 0.14902  | 1 |
| TMPRSS7  | 1 | 14891.54812 | 0.407398 | 0.055966 | 2.96558  | 0.73107  | 1 |
| TMX2     | 1 | 169.2298677 | 38.08002 | 5.201811 | 278.7659 | 0.026683 | 1 |
| TNC      | 2 | 10049.9885  | 1.264448 | 0.305002 | 5.24203  | 0.674188 | 1 |
| TNFAIP6  | 1 | 7350.160927 | 0.851702 | 0.116995 | 6.200232 | 1        | 1 |
| TNFRSF13 | 1 | 1501.516536 | 4.269094 | 0.586129 | 31.09413 | 0.213173 | 1 |
| TNFSF9   | 1 | 833.2357912 | 7.713603 | 1.058499 | 56.21139 | 0.124409 | 1 |
| TNIP2    | 2 | 11808.92791 | 1.068269 | 0.257686 | 4.428641 | 0.712151 | 1 |
| TNIP3    | 1 | 7849.47933  | 0.795893 | 0.10933  | 5.793902 | 1        | 1 |
| TNKS1BP1 | 2 | 11097.38417 | 1.140139 | 0.27502  | 4.726622 | 0.696334 | 1 |
| TNRC18   | 2 | 11033.24135 | 1.147073 | 0.276693 | 4.755373 | 0.694934 | 1 |
| TNRC6A   | 1 | 1573.360719 | 4.072984 | 0.55922  | 29.66488 | 0.222062 | 1 |
| TNRC6C   | 1 | 5719.351731 | 1.101867 | 0.151354 | 8.021684 | 0.601555 | 1 |
| TNS1     | 4 | 29649.78287 | 0.831358 | 0.295887 | 2.335876 | 1        | 1 |
| TNS3     | 2 | 7704.619025 | 1.665381 | 0.401696 | 6.904464 | 0.347855 | 1 |
| TOPAZ1   | 4 | 5378.342488 | 5.084542 | 1.809121 | 14.29013 | 0.010367 | 1 |
| TOR3A    | 2 | 1011.952252 | 13.02766 | 3.138678 | 54.0737  | 0.011442 | 1 |
| TOX      | 1 | 190.3376755 | 33.85423 | 4.627484 | 247.6742 | 0.02993  | 1 |
| TP53BP1  | 1 | 6127.222562 | 1.026812 | 0.141046 | 7.475194 | 0.627172 | 1 |
| TP53I13  | 1 | 2314.196679 | 2.760905 | 0.379146 | 20.10462 | 0.309177 | 1 |
| TPD52    | 1 | 6501.081253 | 0.966289 | 0.132733 | 7.034519 | 1        | 1 |
| TPD52L3  | 1 | 1425.044693 | 4.499561 | 0.61775  | 32.77388 | 0.203422 | 1 |
| TPMT     | 1 | 16955.33266 | 0.354689 | 0.048726 | 2.581874 | 0.521237 | 1 |
| TPSD1    | 2 | 1422.96307  | 9.249529 | 2.229294 | 38.37708 | 0.021697 | 1 |
| TRABD2A  | 3 | 8155.11666  | 2.419382 | 0.745811 | 7.848382 | 0.139541 | 1 |
| TRAF3    | 1 | 506.5865669 | 12.7039  | 1.741988 | 92.64653 | 0.077688 | 1 |
| TRAP1    | 1 | 5033.378505 | 1.255529 | 0.172457 | 9.140569 | 0.554565 | 1 |

|          |   |             |          |          |          |          |             |
|----------|---|-------------|----------|----------|----------|----------|-------------|
| TRDN     | 1 | 2642.56276  | 2.414647 | 0.331613 | 17.5823  | 0.344735 | 1           |
| TREX1    | 1 | 368.5779408 | 17.47029 | 2.393855 | 127.4977 | 0.057186 | 1           |
| TREX2    | 1 | 1113.603426 | 5.765124 | 0.79135  | 41.99995 | 0.162822 | 1           |
| TRHDE    | 1 | 209.4573823 | 30.7616  | 4.206705 | 224.9447 | 0.032859 | 1           |
| TRIM16   | 1 | 10566.92511 | 0.584623 | 0.080311 | 4.255775 | 1        | 1           |
| TRIM22   | 2 | 11784.73596 | 1.07057  | 0.258241 | 4.438182 | 0.711612 | 1           |
| TRIM29   | 1 | 11027.1546  | 0.559153 | 0.076812 | 4.07035  | 1        | 1           |
| TRIM41   | 1 | 1728.33141  | 3.705481 | 0.50879  | 26.98675 | 0.241127 | 1           |
| TRIM45   | 2 | 7952.253027 | 1.611882 | 0.388794 | 6.682627 | 0.362194 | 1           |
| TRIM46   | 1 | 5385.762837 | 1.171704 | 0.160945 | 8.530191 | 0.579382 | 1           |
| TRIM47   | 1 | 709.2041433 | 9.067108 | 1.243981 | 66.08821 | 0.106916 | 1           |
| TRIM48   | 1 | 215.6050863 | 29.88374 | 4.087193 | 218.4967 | 0.033936 | 1           |
| TRIM51   | 2 | 6591.551386 | 1.955489 | 0.471657 | 8.107457 | 0.282331 | 1           |
| TRIM59   | 1 | 445.6038395 | 14.44599 | 1.98035  | 105.3787 | 0.068668 | 1           |
| TRIM63   | 1 | 1573.74217  | 4.07199  | 0.559084 | 29.65764 | 0.222186 | 1           |
| TRIML1   | 1 | 2065.394201 | 3.096579 | 0.425222 | 22.5501  | 0.281021 | 1           |
| TRIOBP   | 3 | 9637.291631 | 2.034821 | 0.627284 | 6.600679 | 0.197087 | 1           |
| TRIP11   | 1 | 10091.73853 | 0.613358 | 0.084258 | 4.464973 | 1        | 1           |
| TRMT44   | 1 | 1112.12794  | 5.772806 | 0.792403 | 42.05597 | 0.162554 | 1           |
| TRNAU1A  | 1 | 439.9655683 | 14.63145 | 2.005718 | 106.7345 | 0.067789 | 1           |
| TRPM1    | 4 | 7564.694558 | 3.582891 | 1.274949 | 10.06873 | 0.031686 | 1           |
| TRPM2    | 1 | 14393.85218 | 0.422371 | 0.058023 | 3.074581 | 0.727859 | 1           |
| TRPM3    | 1 | 2318.912002 | 2.755239 | 0.378369 | 20.06334 | 0.309731 | 1           |
| TRPM4    | 1 | 4163.00977  | 1.523386 | 0.209241 | 11.09108 | 0.487147 | 1           |
| TRPM8    | 1 | 2362.976038 | 2.703382 | 0.37125  | 19.68557 | 0.31459  | 1           |
| TRPV1    | 1 | 1397.566838 | 4.588532 | 0.629956 | 33.42237 | 0.199974 | 1           |
| TSACC    | 2 | 3686.00049  | 3.538424 | 0.853317 | 14.67267 | 0.116448 | 1           |
| TSC22D1  | 1 | 968.7192618 | 6.631205 | 0.910114 | 48.31578 | 0.14321  | 1           |
| TSEN54   | 1 | 3918.734529 | 1.619945 | 0.2225   | 11.79425 | 0.466517 | 1           |
| TSNARE1  | 1 | 1421.882681 | 4.509624 | 0.61913  | 32.84723 | 0.203039 | 1           |
| TSNAXIP1 | 2 | 9445.855275 | 1.348685 | 0.325318 | 5.591301 | 0.662426 | 1           |
| TSPAN32  | 1 | 963.0108634 | 6.670665 | 0.915525 | 48.60358 | 0.142389 | 1           |
| TSPEAR   | 1 | 2214.91199  | 2.885813 | 0.396292 | 21.01458 | 0.298114 | 1           |
| TSPYL6   | 2 | 7489.760784 | 1.714665 | 0.413581 | 7.108827 | 0.335299 | 1           |
| TSTA3    | 1 | 688.5962869 | 9.33923  | 1.281263 | 68.07443 | 0.104063 | 1           |
| TTBK1    | 1 | 1714.223266 | 3.736188 | 0.513004 | 27.21051 | 0.239424 | 1           |
| TTC13    | 2 | 605.5480574 | 21.8063  | 5.248965 | 90.59206 | 0.004281 | 1           |
| TTC16    | 1 | 2045.903374 | 3.126324 | 0.429305 | 22.76681 | 0.278828 | 1           |
| TTC27    | 5 | 7714.429346 | 4.514389 | 1.768155 | 11.52598 | 0.007317 | 1           |
| TTC38    | 3 | 3102.569298 | 6.491397 | 2.000419 | 21.0647  | 0.013228 | 1           |
| TTC39B   | 1 | 1019.146383 | 6.301826 | 0.864951 | 45.91362 | 0.150023 | 1           |
| TTC40    | 3 | 11314.26205 | 1.721208 | 0.530618 | 5.58322  | 0.426553 | 1           |
| TTC6     | 1 | 1960.759124 | 3.263195 | 0.448091 | 23.76403 | 0.268933 | 1           |
| TTC7A    | 2 | 3361.994947 | 3.884504 | 0.936744 | 16.10832 | 0.099978 | 1           |
| TTLL2    | 1 | 12681.87618 | 0.48285  | 0.066331 | 3.514859 | 0.722327 | 1           |
| TTLL4    | 1 | 7265.288414 | 0.861951 | 0.118403 | 6.274853 | 1        | 1           |
| TTN      | 7 | 138780.5786 | 0.172282 | 0.07621  | 0.389465 | 1.37E-06 | 0.003192141 |
| TUBB1    | 2 | 8607.560954 | 1.48516  | 0.358232 | 6.157176 | 0.399722 | 1           |
| TUBB8    | 1 | 5257.240826 | 1.200975 | 0.164965 | 8.743327 | 0.570474 | 1           |
| TUBGCP6  | 2 | 13987.37978 | 0.893695 | 0.215579 | 3.704859 | 1        | 1           |
| TUT1     | 1 | 3540.125208 | 1.795937 | 0.246666 | 13.07593 | 0.432858 | 1           |
| TXNDC11  | 1 | 1749.713502 | 3.659885 | 0.502533 | 26.6545  | 0.243796 | 1           |
| TXNDC16  | 3 | 8790.924235 | 2.238535 | 0.690072 | 7.261616 | 0.163473 | 1           |
| TYK2     | 2 | 13496.12308 | 0.928141 | 0.223888 | 3.847671 | 1        | 1           |
| TYRO3    | 1 | 559.5361777 | 11.49929 | 1.577093 | 83.84643 | 0.085446 | 1           |
| UBAP2    | 1 | 6116.488542 | 1.028659 | 0.141299 | 7.488642 | 0.626502 | 1           |
| UBE2Q2   | 1 | 134.6784142 | 47.85594 | 6.527671 | 350.8435 | 0.021402 | 1           |
| UBE4B    | 1 | 2441.286913 | 2.615841 | 0.359233 | 19.04786 | 0.32312  | 1           |
| UBN2     | 1 | 1275.126619 | 5.031594 | 0.690738 | 36.65202 | 0.184085 | 1           |
| UBXN11   | 1 | 5077.615874 | 1.244367 | 0.170924 | 9.059292 | 0.557806 | 1           |
| UCMA     | 1 | 612.6608019 | 10.49995 | 1.440252 | 76.54831 | 0.09314  | 1           |
| UCN2     | 1 | 805.5403551 | 7.979688 | 1.094968 | 58.15275 | 0.120628 | 1           |
| UGGT2    | 1 | 15731.5058  | 0.384276 | 0.05279  | 2.797262 | 0.516225 | 1           |
| UGT1A1   | 1 | 5772.784225 | 1.091431 | 0.14992  | 7.945695 | 0.605041 | 1           |
| UGT2B11  | 3 | 8212.09754  | 2.402032 | 0.740464 | 7.792089 | 0.141633 | 1           |
| UGT2B15  | 1 | 5411.703012 | 1.165965 | 0.160157 | 8.4884   | 0.581156 | 1           |
| UGT3A1   | 1 | 2243.445542 | 2.848784 | 0.391209 | 20.74482 | 0.30126  | 1           |
| UIMC1    | 1 | 3682.861041 | 1.725339 | 0.236972 | 12.56178 | 0.445794 | 1           |
| UNC13C   | 1 | 5665.640966 | 1.112556 | 0.152822 | 8.099513 | 0.598104 | 1           |
| UNC50    | 1 | 66.3723496  | 97.13252 | 13.15204 | 717.3583 | 0.0106   | 1           |
| UNC5CL   | 1 | 453.5868406 | 14.1913  | 1.945509 | 103.5168 | 0.069866 | 1           |
| UNC80    | 2 | 3882.403286 | 3.35676  | 0.809523 | 13.91911 | 0.126729 | 1           |
| UNC93A   | 1 | 4154.368392 | 1.526608 | 0.209683 | 11.11454 | 0.4864   | 1           |

|         |   |             |          |          |          |          |   |
|---------|---|-------------|----------|----------|----------|----------|---|
| UNC93B1 | 1 | 1004.648888 | 6.393134 | 0.877471 | 46.5795  | 0.148121 | 1 |
| UPB1    | 1 | 668.668775  | 9.61832  | 1.319496 | 70.11167 | 0.101201 | 1 |
| UPK2    | 1 | 670.776231  | 9.58802  | 1.315345 | 69.89049 | 0.101488 | 1 |
| UPK3B   | 2 | 4112.03853  | 3.166363 | 0.763621 | 13.12936 | 0.139063 | 1 |
| URB1    | 2 | 4709.13608  | 2.758209 | 0.665216 | 11.43647 | 0.172194 | 1 |
| URB2    | 1 | 6206.279681 | 1.013406 | 0.139204 | 7.377581 | 1        | 1 |
| UROC1   | 1 | 1839.714937 | 3.479584 | 0.477789 | 25.3407  | 0.25462  | 1 |
| UROD    | 1 | 267.1344212 | 24.11432 | 3.300962 | 176.161  | 0.041748 | 1 |
| USH2A   | 4 | 24675.7294  | 1.021338 | 0.363498 | 2.8697   | 1        | 1 |
| USP20   | 1 | 2706.440629 | 2.357051 | 0.323706 | 17.16276 | 0.351337 | 1 |
| USP21   | 1 | 6383.86152  | 0.984502 | 0.135235 | 7.167133 | 1        | 1 |
| USP35   | 2 | 5500.731636 | 2.353709 | 0.567683 | 9.758871 | 0.217893 | 1 |
| USP54   | 1 | 4097.945119 | 1.547981 | 0.212618 | 11.27018 | 0.481728 | 1 |
| USP6    | 1 | 5581.630374 | 1.129687 | 0.155174 | 8.224251 | 0.592574 | 1 |
| USP8    | 5 | 14078.47116 | 2.409125 | 0.943697 | 6.150152 | 0.07112  | 1 |
| USPL1   | 3 | 11792.34073 | 1.64814  | 0.508095 | 5.346174 | 0.43527  | 1 |
| UTP11L  | 1 | 986.5640171 | 6.510798 | 0.893605 | 47.43762 | 0.145669 | 1 |
| UTP20   | 2 | 11416.15001 | 1.106834 | 0.266987 | 4.588536 | 0.70337  | 1 |
| VCAN    | 3 | 3825.653256 | 5.249137 | 1.617759 | 17.03186 | 0.022916 | 1 |
| VEPH1   | 1 | 1957.746378 | 3.268256 | 0.448785 | 23.80091 | 0.268582 | 1 |
| VIM     | 1 | 438.0198041 | 14.69656 | 2.014624 | 107.2105 | 0.067492 | 1 |
| VN1R2   | 1 | 3648.535433 | 1.741812 | 0.239234 | 12.68175 | 0.442745 | 1 |
| VPS13B  | 1 | 5119.010461 | 1.234098 | 0.169514 | 8.984512 | 0.56074  | 1 |
| VPS37C  | 2 | 12407.33865 | 1.014207 | 0.244647 | 4.2045   | 1        | 1 |
| VPS8    | 1 | 2856.87232  | 2.231588 | 0.306481 | 16.2489  | 0.366899 | 1 |
| VPS9D1  | 1 | 5465.972507 | 1.154134 | 0.158532 | 8.402254 | 0.584816 | 1 |
| VRK3    | 1 | 7642.297506 | 0.818165 | 0.112389 | 5.956055 | 1        | 1 |
| VSIG10L | 1 | 5583.366154 | 1.129328 | 0.155125 | 8.221636 | 0.592641 | 1 |
| VSIG8   | 2 | 4637.329435 | 2.801734 | 0.67571  | 11.61699 | 0.168126 | 1 |
| VSX2    | 1 | 289.1644497 | 22.27522 | 3.05005  | 162.681  | 0.045098 | 1 |
| VWA2    | 1 | 4388.604679 | 1.443759 | 0.198306 | 10.51122 | 0.50556  | 1 |
| VWA3A   | 1 | 3391.869176 | 1.875557 | 0.257599 | 13.6558  | 0.41916  | 1 |
| VWA3B   | 1 | 12553.73836 | 0.48804  | 0.067044 | 3.552644 | 0.722307 | 1 |
| VWA5A   | 1 | 6473.520281 | 0.970512 | 0.133313 | 7.065267 | 1        | 1 |
| VWA5B1  | 2 | 17221.38168 | 0.715985 | 0.172715 | 2.968097 | 1        | 1 |
| VWF     | 1 | 13831.67547 | 0.44058  | 0.060525 | 3.20714  | 0.72504  | 1 |
| WDFY2   | 1 | 339.2072948 | 18.9852  | 2.600844 | 138.5849 | 0.052671 | 1 |
| WDFY4   | 2 | 3404.771605 | 3.835039 | 0.92482  | 15.90312 | 0.102123 | 1 |
| WDHD1   | 1 | 896.4927744 | 7.167518 | 0.983643 | 52.22763 | 0.133168 | 1 |
| WDR17   | 2 | 8634.734684 | 1.48032  | 0.357065 | 6.137109 | 0.401247 | 1 |
| WDR27   | 2 | 3516.193193 | 3.711846 | 0.895123 | 15.39207 | 0.107719 | 1 |
| WDR34   | 1 | 1827.498702 | 3.503016 | 0.481005 | 25.51143 | 0.253066 | 1 |
| WDR35   | 1 | 4945.637748 | 1.278259 | 0.175578 | 9.306075 | 0.548233 | 1 |
| WDR41   | 1 | 2548.131716 | 2.505082 | 0.344028 | 18.24104 | 0.334655 | 1 |
| WDR48   | 1 | 883.5196173 | 7.273139 | 0.998122 | 52.99809 | 0.131506 | 1 |
| WDR52   | 3 | 21772.1599  | 0.855508 | 0.263756 | 2.774889 | 1        | 1 |
| WDR6    | 3 | 2369.056457 | 8.526383 | 2.627102 | 27.67278 | 0.00638  | 1 |
| WDR62   | 1 | 1824.338137 | 3.509129 | 0.481844 | 25.55598 | 0.252707 | 1 |
| WDR63   | 1 | 798.2388603 | 8.052913 | 1.105004 | 58.68703 | 0.119505 | 1 |
| WDR65   | 1 | 5784.6568   | 1.089138 | 0.149605 | 7.929002 | 0.605812 | 1 |
| WDR66   | 2 | 2186.648714 | 6.000756 | 1.446763 | 24.8894  | 0.047485 | 1 |
| WDR75   | 1 | 643.2245022 | 9.999809 | 1.371753 | 72.89666 | 0.097467 | 1 |
| WDR81   | 1 | 1841.875476 | 3.475473 | 0.477225 | 25.31074 | 0.254859 | 1 |
| WDR83   | 1 | 243.1636483 | 26.49401 | 3.62542  | 193.6141 | 0.038079 | 1 |
| WDR91   | 1 | 513.6506947 | 12.52884 | 1.718027 | 91.36741 | 0.078716 | 1 |
| WDR96   | 1 | 3040.193034 | 2.095479 | 0.287794 | 15.25754 | 0.385271 | 1 |
| WFS1    | 1 | 6237.72361  | 1.008168 | 0.138485 | 7.339444 | 1        | 1 |
| WIPF1   | 1 | 775.5783816 | 8.288948 | 1.137352 | 60.40932 | 0.11641  | 1 |
| WISP3   | 1 | 1142.445191 | 5.618932 | 0.7713   | 40.93402 | 0.166558 | 1 |
| WNK1    | 1 | 5754.204998 | 1.095038 | 0.150416 | 7.971958 | 0.603818 | 1 |
| WNK4    | 1 | 3919.898287 | 1.619457 | 0.222433 | 11.79069 | 0.466603 | 1 |
| WWC3    | 1 | 3913.031483 | 1.622344 | 0.222829 | 11.81172 | 0.465999 | 1 |
| WWOX    | 1 | 5054.865974 | 1.250083 | 0.171709 | 9.100913 | 0.556153 | 1 |
| XDH     | 4 | 8776.49164  | 3.072849 | 1.093491 | 8.635101 | 0.050075 | 1 |
| XIRP1   | 1 | 8454.37014  | 0.737114 | 0.101256 | 5.36596  | 1        | 1 |
| XIRP2   | 1 | 24679.79956 | 0.23565  | 0.032373 | 1.715331 | 0.178059 | 1 |
| XKR9    | 1 | 2341.049905 | 2.728942 | 0.374759 | 19.87177 | 0.312165 | 1 |
| XYLT1   | 1 | 2029.250984 | 3.152189 | 0.432855 | 22.95526 | 0.276859 | 1 |
| YIPF3   | 1 | 437.1017607 | 14.72748 | 2.018853 | 107.4366 | 0.067343 | 1 |
| ZAP70   | 1 | 814.4690415 | 7.891929 | 1.08294  | 57.51244 | 0.12175  | 1 |
| ZBED5   | 1 | 6807.505138 | 0.921639 | 0.126601 | 6.709429 | 1        | 1 |
| ZBP1    | 1 | 2201.101923 | 2.90408  | 0.3988   | 21.14766 | 0.296535 | 1 |
| ZBTB5   | 1 | 253.5131991 | 25.41136 | 3.477835 | 185.6722 | 0.039762 | 1 |

|          |   |             |          |          |          |          |   |
|----------|---|-------------|----------|----------|----------|----------|---|
| ZC2HC1A  | 3 | 4113.078118 | 4.876658 | 1.503008 | 15.8228  | 0.027596 | 1 |
| ZC3H12C  | 1 | 662.2573196 | 9.711685 | 1.332286 | 70.79323 | 0.100197 | 1 |
| ZC3H3    | 2 | 10765.56858 | 1.176902 | 0.283887 | 4.879049 | 0.68915  | 1 |
| ZC3H6    | 1 | 4564.702274 | 1.387072 | 0.190522 | 10.09843 | 0.519452 | 1 |
| ZC3HC1   | 1 | 1762.368562 | 3.633421 | 0.498901 | 26.46165 | 0.245248 | 1 |
| ZCWPW1   | 1 | 2926.317604 | 2.178021 | 0.299127 | 15.85873 | 0.373888 | 1 |
| ZCWPW2   | 1 | 142.405234  | 45.25791 | 6.175692 | 331.6679 | 0.022492 | 1 |
| ZDHHHC11 | 2 | 649.8953028 | 20.3147  | 4.890667 | 84.38254 | 0.004902 | 1 |
| ZDHHHC21 | 1 | 234.6311812 | 27.45841 | 3.756845 | 200.6908 | 0.036854 | 1 |
| ZDHHHC6  | 1 | 2540.363619 | 2.512821 | 0.345091 | 18.29741 | 0.333799 | 1 |
| ZFAND1   | 2 | 293.9468046 | 44.97807 | 10.8011  | 187.2982 | 0.001045 | 1 |
| ZFAT     | 1 | 1904.278788 | 3.360741 | 0.461479 | 24.47477 | 0.262224 | 1 |
| ZFHX3    | 3 | 16285.59252 | 1.171042 | 0.361027 | 3.798437 | 0.74307  | 1 |
| ZFP14    | 1 | 1037.897102 | 6.187514 | 0.849275 | 45.07999 | 0.152598 | 1 |
| ZFR2     | 7 | 12405.27524 | 4.088278 | 1.808176 | 9.243577 | 0.00315  | 1 |
| ZFYVE26  | 1 | 6268.601024 | 1.003076 | 0.137786 | 7.302367 | 1        | 1 |
| ZG16     | 1 | 3833.372227 | 1.656589 | 0.227532 | 12.06111 | 0.459054 | 1 |
| ZIC3     | 1 | 738.049311  | 8.711736 | 1.195288 | 63.4946  | 0.111037 | 1 |
| ZIM3     | 1 | 311.3850015 | 20.68382 | 2.832822 | 151.0227 | 0.048437 | 1 |
| ZMYND10  | 1 | 2054.294598 | 3.113449 | 0.427538 | 22.67301 | 0.279752 | 1 |
| ZNF12    | 1 | 157.9033933 | 40.81335 | 5.57291  | 298.8976 | 0.024977 | 1 |
| ZNF132   | 1 | 749.0958956 | 8.58289  | 1.177633 | 62.55431 | 0.112596 | 1 |
| ZNF134   | 1 | 216.8050265 | 29.71821 | 4.064654 | 217.2809 | 0.03409  | 1 |
| ZNF142   | 3 | 5471.875203 | 3.645533 | 1.12368  | 11.82713 | 0.056111 | 1 |
| ZNF19    | 5 | 6852.924803 | 5.099868 | 1.997403 | 13.02123 | 0.004474 | 1 |
| ZNF221   | 2 | 9334.818393 | 1.365353 | 0.329338 | 5.660414 | 0.660374 | 1 |
| ZNF227   | 1 | 425.7079934 | 15.12234 | 2.072858 | 110.3236 | 0.065708 | 1 |
| ZNF268   | 2 | 1113.337497 | 11.83651 | 2.852049 | 49.12366 | 0.013697 | 1 |
| ZNF280D  | 1 | 4376.025546 | 1.447983 | 0.198886 | 10.54198 | 0.504519 | 1 |
| ZNF30    | 2 | 6429.830577 | 2.005997 | 0.483837 | 8.316904 | 0.27273  | 1 |
| ZNF304   | 1 | 123.1554107 | 52.33597 | 7.133978 | 383.9448 | 0.019532 | 1 |
| ZNF318   | 2 | 17405.67733 | 0.707846 | 0.170752 | 2.934357 | 1        | 1 |
| ZNF337   | 1 | 384.3295251 | 16.75323 | 2.295847 | 122.2515 | 0.059436 | 1 |
| ZNF365   | 1 | 1125.498108 | 5.703925 | 0.782957 | 41.55372 | 0.164292 | 1 |
| ZNF407   | 1 | 2000.478008 | 3.197896 | 0.439128 | 23.28827 | 0.273489 | 1 |
| ZNF414   | 1 | 412.5351963 | 15.60603 | 2.139004 | 113.8606 | 0.063771 | 1 |
| ZNF419   | 1 | 3110.545046 | 2.047505 | 0.281208 | 14.90812 | 0.392258 | 1 |
| ZNF423   | 1 | 1320.460471 | 4.85797  | 0.66692  | 35.38636 | 0.189934 | 1 |
| ZNF43    | 1 | 2318.845426 | 2.755319 | 0.37838  | 20.06392 | 0.309731 | 1 |
| ZNF432   | 1 | 3963.435245 | 1.601386 | 0.219952 | 11.6591  | 0.470296 | 1 |
| ZNF469   | 2 | 7279.908032 | 1.76561  | 0.425867 | 7.320076 | 0.322976 | 1 |
| ZNF471   | 2 | 4845.465626 | 2.679125 | 0.646147 | 11.10847 | 0.179926 | 1 |
| ZNF48    | 1 | 589.3388938 | 10.91648 | 1.497293 | 79.58993 | 0.089664 | 1 |
| ZNF493   | 2 | 5832.751534 | 2.216732 | 0.534653 | 9.190813 | 0.237407 | 1 |
| ZNF517   | 1 | 1201.237258 | 5.34267  | 0.733408 | 38.91983 | 0.174378 | 1 |
| ZNF528   | 1 | 4710.907064 | 1.343228 | 0.184501 | 9.779166 | 0.530686 | 1 |
| ZNF530   | 2 | 10422.87984 | 1.217328 | 0.293637 | 5.04666  | 0.681869 | 1 |
| ZNF544   | 1 | 4426.67504  | 1.431122 | 0.196571 | 10.4192  | 0.508592 | 1 |
| ZNF550   | 2 | 3925.439704 | 3.319381 | 0.800511 | 13.76407 | 0.129014 | 1 |
| ZNF598   | 1 | 1411.206774 | 4.543934 | 0.623837 | 33.0973  | 0.201636 | 1 |
| ZNF599   | 1 | 3501.638186 | 1.815959 | 0.249415 | 13.22175 | 0.429371 | 1 |
| ZNF600   | 1 | 5375.30586  | 1.174033 | 0.161265 | 8.547151 | 0.57863  | 1 |
| ZNF607   | 1 | 6190.131045 | 1.016116 | 0.139577 | 7.397317 | 1        | 1 |
| ZNF621   | 1 | 767.6762314 | 8.374535 | 1.149081 | 61.03385 | 0.115281 | 1 |
| ZNF644   | 1 | 2147.979622 | 2.976536 | 0.408745 | 21.67553 | 0.290529 | 1 |
| ZNF653   | 2 | 3353.468131 | 3.894515 | 0.939157 | 16.14985 | 0.099531 | 1 |
| ZNF678   | 1 | 6167.540703 | 1.019932 | 0.140101 | 7.4251   | 1        | 1 |
| ZNF708   | 1 | 7895.208458 | 0.791135 | 0.108676 | 5.759259 | 1        | 1 |
| ZNF721   | 1 | 3003.047447 | 2.121716 | 0.291397 | 15.44863 | 0.381599 | 1 |
| ZNF764   | 1 | 5553.516801 | 1.135536 | 0.155978 | 8.266837 | 0.590715 | 1 |
| ZNF778   | 2 | 11664.65406 | 1.082133 | 0.26103  | 4.486122 | 0.708922 | 1 |
| ZNF780B  | 1 | 3388.828504 | 1.877263 | 0.257833 | 13.66822 | 0.418879 | 1 |
| ZNF804B  | 1 | 1102.593714 | 5.822946 | 0.79928  | 42.42156 | 0.16135  | 1 |
| ZNF808   | 1 | 3879.773561 | 1.63647  | 0.224769 | 11.91459 | 0.463145 | 1 |
| ZNF836   | 2 | 7096.150709 | 1.812694 | 0.437222 | 7.515319 | 0.312139 | 1 |
| ZNF839   | 1 | 744.3787285 | 8.637443 | 1.185108 | 62.95242 | 0.111888 | 1 |
| ZNF845   | 1 | 1079.10269  | 5.950264 | 0.81674  | 43.34993 | 0.158129 | 1 |
| ZNF98    | 1 | 542.5978466 | 11.85906 | 1.626348 | 86.47437 | 0.082964 | 1 |
| ZP4      | 1 | 2411.972881 | 2.647944 | 0.36364  | 19.28173 | 0.319961 | 1 |
| ZPBP2    | 1 | 1837.221369 | 3.484342 | 0.478442 | 25.37536 | 0.254261 | 1 |
| ZSCAN30  | 1 | 5064.449488 | 1.247669 | 0.171377 | 9.083334 | 0.5568   | 1 |
| ZSCAN5B  | 1 | 1110.898874 | 5.779222 | 0.793283 | 42.10274 | 0.162421 | 1 |
| ZSWIM4   | 2 | 5054.93764  | 2.565923 | 0.618853 | 10.63898 | 0.19197  | 1 |



|       |   |             |          |          |          |          |   |
|-------|---|-------------|----------|----------|----------|----------|---|
| ZUFSP | 1 | 594.7760009 | 10.81645 | 1.483596 | 78.85947 | 0.090534 | 1 |
| ZYX   | 1 | 1252.488403 | 5.123002 | 0.703277 | 37.31838 | 0.18108  | 1 |
